# Supplementary material
Source: publisher site journal article supplement (https://www.dovepress.com/get_supplementary_file.php?f=292143.xlsx)
Supplement: Supplementary file 1 [file get_supplementary_file.php]

## Sheet: Filter on Volcano Plot
Moderated T-Test [Treated] Vs [Untreated] P <= 0.05 FC >=2.0
Created from Advanced Analysis operation: significance Analysis.
Experiment: Treated vs Untreated
corrected p-value cut-off:0.05
Fold change cut-off:2.0
Selected Test : Moderated T-Test
Entity List: Filtered on Expression (20.0 - 100.0)th Percentile in the Normalized Data
Interpretation: Treatment (Non-averaged)
p-value computation: Asymptotic
Multiple Testing Correction: Benjamini-Hochberg
Number of entities: 1387
ProbeName	p (Corr) ([Treated] Vs [Untreated])	p ([Treated] Vs [Untreated])	Regulation ([Treated] Vs [Untreated])	FC (abs) ([Treated] Vs [Untreated])	FC ([Treated] Vs [Untreated])	Log FC ([Treated] Vs [Untreated])	Description	PrimaryAccession
CUST_1623_PI443154341	0.0271477	0.0141052	up	3.96858	3.96858	1.98862	Unknown	6666666.414137.peg.1595
CUST_299_PI443154341	0.00159333	5.4201e-05	up	3.82324	3.82324	1.9348	Unknown	6666666.414137.peg.292
CUST_5943_PI443154341	0.00526014	0.00114625	up	4.20825	4.20825	2.07322	Unknown	6666666.414137.peg.5853
CUST_3972_PI443154341	0.00260263	0.000254916	down	2.09616	-2.09616	-1.06775	Unknown	6666666.414137.peg.3896
CUST_4890_PI443154341	0.00197395	0.000108024	down	2.17588	-2.17588	-1.1216	Unknown	6666666.414137.peg.4805
CUST_2340_PI443154341	0.00433501	0.000785695	up	4.74416	4.74416	2.24615	Unknown	6666666.414137.peg.2305
CUST_70_PI443154341	0.00546591	0.0012396	down	2.4251	-2.4251	-1.27805	Unknown	6666666.414137.peg.69
CUST_1234_PI443154341	0.00526873	0.00115224	up	2.69203	2.69203	1.42869	Unknown	6666666.414137.peg.1215
CUST_1928_PI443154341	0.00155167	5.15097e-05	down	2.69471	-2.69471	-1.43013	Unknown	6666666.414137.peg.1897
CUST_1422_PI443154341	0.00631048	0.00160847	up	2.01155	2.01155	1.00831	Unknown	6666666.414137.peg.1401
CUST_2117_PI443154341	0.00960308	0.00329442	down	2.15916	-2.15916	-1.11047	Unknown	6666666.414137.peg.2083
CUST_3499_PI443154341	0.000977173	1.26864e-05	up	4.7203	4.7203	2.23888	Unknown	6666666.414137.peg.3427
CUST_3325_PI443154341	0.00197189	0.000107263	up	10.4925	10.4925	3.39128	Unknown	6666666.414137.peg.3262
CUST_7_PI443154341	0.0341029	0.0190326	up	2.01562	2.01562	1.01122	Unknown	6666666.414137.peg.6
CUST_4149_PI443154341	0.00484157	0.000991387	up	2.16725	2.16725	1.11586	Unknown	6666666.414137.peg.4069
CUST_4484_PI443154341	0.00165181	6.19204e-05	up	9.85501	9.85501	3.30086	Unknown	6666666.414137.peg.4403
CUST_3265_PI443154341	0.0164208	0.00711614	up	2.66206	2.66206	1.41255	Unknown	6666666.414137.peg.3207
CUST_4757_PI443154341	0.00131456	3.50954e-05	down	2.92984	-2.92984	-1.55082	Unknown	6666666.414137.repeat.41
CUST_5147_PI443154341	0.0180144	0.00812833	up	3.6337	3.6337	1.86144	Unknown	6666666.414137.peg.5060
CUST_559_PI443154341	0.000773776	1.32742e-06	up	46.0228	46.0228	5.52428	Unknown	6666666.414137.peg.549
CUST_2820_PI443154341	0.00276296	0.000295594	up	2.10519	2.10519	1.07395	Unknown	6666666.414137.peg.2769
CUST_2256_PI443154341	0.00268609	0.000278322	down	2.6617	-2.6617	-1.41235	Unknown	6666666.414137.peg.2222
CUST_2002_PI443154341	0.00518018	0.00111961	up	2.70654	2.70654	1.43645	Unknown	6666666.414137.peg.1970
CUST_2341_PI443154341	0.0017053	7.33309e-05	up	4.19134	4.19134	2.06741	Unknown	6666666.414137.peg.2306
CUST_5328_PI443154341	0.0189225	0.00871957	up	2.19395	2.19395	1.13353	Unknown	6666666.414137.peg.5240
CUST_5480_PI443154341	0.00289151	0.000323127	up	2.10448	2.10448	1.07347	Unknown	6666666.414137.peg.5392
CUST_2302_PI443154341	0.0198118	0.00927899	down	2.27048	-2.27048	-1.183	Unknown	6666666.414137.peg.2267
CUST_1143_PI443154341	0.000883675	4.60527e-06	up	34.0044	34.0044	5.08765	Unknown	6666666.414137.peg.1124
CUST_2973_PI443154341	0.00204792	0.000122841	up	2.715	2.715	1.44095	Unknown	6666666.414137.peg.2921
CUST_217_PI443154341	0.000886816	6.72199e-06	up	14.9141	14.9141	3.8986	Unknown	6666666.414137.peg.210
CUST_3125_PI443154341	0.00392433	0.00063171	up	2.47794	2.47794	1.30914	Unknown	6666666.414137.peg.3067
CUST_422_PI443154341	0.0136812	0.0055534	up	2.13494	2.13494	1.0942	Unknown	6666666.414137.peg.415
CUST_3776_PI443154341	0.015368	0.00649418	up	4.67246	4.67246	2.22418	Unknown	6666666.414137.peg.3702
CUST_5282_PI443154341	0.00173601	7.75028e-05	up	6.8026	6.8026	2.76609	Unknown	6666666.414137.peg.5194
CUST_5412_PI443154341	0.00118797	2.62802e-05	down	3.42916	-3.42916	-1.77785	Unknown	6666666.414137.peg.5324
CUST_5346_PI443154341	0.00171707	7.4533e-05	down	2.62723	-2.62723	-1.39354	Unknown	6666666.414137.peg.5258
CUST_5909_PI443154341	0.0070862	0.00198786	up	4.16205	4.16205	2.0573	Unknown	6666666.414137.peg.5819
CUST_2554_PI443154341	0.00117042	2.23431e-05	up	4.35694	4.35694	2.12332	Unknown	6666666.414137.peg.2510
CUST_1972_PI443154341	0.0157087	0.00668879	up	2.8464	2.8464	1.50914	Unknown	6666666.414137.peg.1941
CUST_5044_PI443154341	0.00260898	0.000257682	down	2.00995	-2.00995	-1.00716	Unknown	6666666.414137.peg.4959
CUST_2720_PI443154341	0.00116069	2.10738e-05	up	4.31517	4.31517	2.10942	Unknown	6666666.414137.peg.2672
CUST_2876_PI443154341	0.0078036	0.00232633	up	2.51128	2.51128	1.32842	Unknown	6666666.414137.peg.2825
CUST_4924_PI443154341	0.0146282	0.00610368	up	4.72793	4.72793	2.24121	Unknown	6666666.414137.peg.4839
CUST_1149_PI443154341	0.00220214	0.000141863	up	21.2774	21.2774	4.41125	Unknown	6666666.414137.peg.1130
CUST_550_PI443154341	0.00385347	0.000602253	up	4.56084	4.56084	2.1893	Unknown	6666666.414137.peg.540
CUST_2922_PI443154341	0.00212854	0.000130806	up	4.57417	4.57417	2.19351	Unknown	6666666.414137.peg.2870
CUST_3466_PI443154341	0.00258773	0.000246869	up	4.24144	4.24144	2.08455	Unknown	6666666.414137.peg.3398
CUST_1287_PI443154341	0.00419715	0.000723696	down	2.21213	-2.21213	-1.14544	Unknown	6666666.414137.peg.1267
CUST_897_PI443154341	0.00379547	0.000577483	up	2.71859	2.71859	1.44286	Unknown	6666666.414137.peg.882
CUST_3473_PI443154341	0.00127191	3.17715e-05	up	5.25889	5.25889	2.39476	Unknown	6666666.414137.peg.3405
CUST_3994_PI443154341	0.00267383	0.000275832	down	2.64731	-2.64731	-1.40452	Unknown	6666666.414137.peg.3918
CUST_2900_PI443154341	0.00944274	0.00321534	down	2.10328	-2.10328	-1.07264	Unknown	6666666.414137.peg.2849
CUST_3862_PI443154341	0.00701901	0.00196094	down	2.18708	-2.18708	-1.12901	Unknown	6666666.414137.peg.3788
CUST_3845_PI443154341	0.000661713	4.88456e-07	up	26.817	26.817	4.74507	Unknown	6666666.414137.peg.3771
CUST_5711_PI443154341	0.00159333	5.49875e-05	down	3.12262	-3.12262	-1.64276	Unknown	6666666.414137.peg.5623
CUST_3526_PI443154341	0.00168152	7.12917e-05	down	3.38307	-3.38307	-1.75833	Unknown	6666666.414137.peg.3454
CUST_566_PI443154341	0.000773776	2.21356e-06	up	33.5853	33.5853	5.06976	Unknown	6666666.414137.peg.556
CUST_3278_PI443154341	0.00166822	6.66191e-05	up	2.67682	2.67682	1.42052	Unknown	6666666.414137.peg.3220
CUST_4029_PI443154341	0.00171707	7.4371e-05	up	2.45079	2.45079	1.29325	Unknown	6666666.414137.peg.3953
CUST_5154_PI443154341	0.00225191	0.000147516	up	2.45115	2.45115	1.29346	Unknown	6666666.414137.peg.5066
CUST_5684_PI443154341	0.00322701	0.000423727	up	2.49674	2.49674	1.32004	Unknown	6666666.414137.peg.5596
CUST_2405_PI443154341	0.00324822	0.000432141	up	2.19551	2.19551	1.13455	Unknown	6666666.414137.peg.2367
CUST_4925_PI443154341	0.00117042	2.30542e-05	up	4.17596	4.17596	2.06211	Unknown	6666666.414137.peg.4840
CUST_2842_PI443154341	0.0232487	0.0115575	up	2.96921	2.96921	1.57008	Unknown	6666666.414137.peg.2791
CUST_2846_PI443154341	0.00911569	0.00303057	down	2.31203	-2.31203	-1.20916	Unknown	6666666.414137.peg.2795
CUST_3537_PI443154341	0.00199843	0.000114356	down	2.29745	-2.29745	-1.20003	Unknown	6666666.414137.peg.3465
CUST_5694_PI443154341	0.00258773	0.000247504	up	6.34082	6.34082	2.66467	Unknown	6666666.414137.peg.5606
CUST_4515_PI443154341	0.00294582	0.000341322	down	2.27313	-2.27313	-1.18468	Unknown	6666666.414137.peg.4432
CUST_2719_PI443154341	0.00236688	0.000160784	up	6.74575	6.74575	2.75398	Unknown	6666666.414137.peg.2671
CUST_2261_PI443154341	0.00173601	7.86884e-05	down	2.44232	-2.44232	-1.28825	Unknown	6666666.414137.peg.2227
CUST_1661_PI443154341	0.00257147	0.000234846	up	2.63371	2.63371	1.3971	Unknown	6666666.414137.peg.1631
CUST_1115_PI443154341	0.00545531	0.0012354	down	2.00354	-2.00354	-1.00255	Unknown	6666666.414137.peg.1098
CUST_563_PI443154341	0.00103294	1.59566e-05	up	31.7862	31.7862	4.99033	Unknown	6666666.414137.peg.553
CUST_2003_PI443154341	0.00940682	0.00319693	up	2.18252	2.18252	1.126	Unknown	6666666.414137.peg.1971
CUST_979_PI443154341	0.0274217	0.014326	up	2.343	2.343	1.22836	Unknown	6666666.414137.peg.964
CUST_5960_PI443154341	0.00159625	5.75295e-05	up	8.79453	8.79453	3.13661	Unknown	6666666.414137.peg.5870
CUST_2512_PI443154341	0.0030266	0.00036075	down	4.26225	-4.26225	-2.09161	Unknown	6666666.414137.peg.2468
CUST_1159_PI443154341	0.00454566	0.000862497	up	2.47291	2.47291	1.30621	Unknown	6666666.414137.peg.1140
CUST_4643_PI443154341	0.00248222	0.00020084	up	2.72696	2.72696	1.44729	Unknown	6666666.414137.peg.4560
CUST_5275_PI443154341	0.00657034	0.00173085	up	8.62365	8.62365	3.1083	Unknown	6666666.414137.peg.5187
CUST_2089_PI443154341	0.00257147	0.00022854	down	2.13875	-2.13875	-1.09677	Unknown	6666666.414137.peg.2056
CUST_5186_PI443154341	0.00118644	2.47622e-05	up	5.99013	5.99013	2.58259	Unknown	6666666.414137.peg.5098
CUST_2813_PI443154341	0.00611602	0.00152188	up	5.92739	5.92739	2.5674	Unknown	6666666.414137.peg.2763
CUST_4144_PI443154341	0.00203552	0.000120656	up	30.9765	30.9765	4.9531	Unknown	6666666.414137.peg.4064
CUST_3751_PI443154341	0.00451148	0.000852622	up	3.15609	3.15609	1.65814	Unknown	6666666.414137.peg.3678
CUST_2433_PI443154341	0.00974426	0.00336445	down	2.07594	-2.07594	-1.05376	Unknown	6666666.414137.peg.2395
CUST_5190_PI443154341	0.0172587	0.00762675	up	2.34317	2.34317	1.22846	Unknown	6666666.414137.peg.5102
CUST_785_PI443154341	0.00538811	0.00121044	up	9.35755	9.35755	3.22613	Unknown	6666666.414137.peg.772
CUST_3437_PI443154341	0.00304891	0.000365769	up	2.57934	2.57934	1.367	Unknown	6666666.414137.peg.3370
CUST_1258_PI443154341	0.000969903	1.24326e-05	up	6.31001	6.31001	2.65764	Unknown	6666666.414137.peg.1238
CUST_51_PI443154341	0.0133714	0.00537712	up	2.15337	2.15337	1.1066	Unknown	6666666.414137.peg.50
CUST_2519_PI443154341	0.00253256	0.000212677	down	2.47277	-2.47277	-1.30613	Unknown	6666666.414137.peg.2475
CUST_2821_PI443154341	0.00241484	0.00017609	down	3.67787	-3.67787	-1.87887	Unknown	6666666.414137.peg.2770
CUST_2174_PI443154341	0.00665746	0.00177527	up	2.04518	2.04518	1.03223	Unknown	6666666.414137.peg.2140
CUST_2753_PI443154341	0.00621777	0.00156747	up	2.75364	2.75364	1.46134	Unknown	6666666.414137.peg.2705
CUST_6014_PI443154341	0.00311425	0.000386403	down	2.32659	-2.32659	-1.21822	Unknown	6666666.414137.peg.5923
CUST_1869_PI443154341	0.00165181	6.26747e-05	up	69.8532	69.8532	6.12625	Unknown	6666666.414137.peg.1838
CUST_2673_PI443154341	0.0102204	0.00361194	up	2.79227	2.79227	1.48144	Unknown	6666666.414137.peg.2626
CUST_641_PI443154341	0.0110332	0.00402707	up	4.81194	4.81194	2.26662	Unknown	6666666.414137.peg.630
CUST_4290_PI443154341	0.00263359	0.000264873	up	7.63137	7.63137	2.93194	Unknown	6666666.414137.peg.4210
CUST_5290_PI443154341	0.000917137	9.06865e-06	up	9.68123	9.68123	3.27519	Unknown	6666666.414137.peg.5202
CUST_1666_PI443154341	0.0320343	0.0175781	up	2.9725	2.9725	1.57168	Unknown	6666666.414137.peg.1636
CUST_2386_PI443154341	0.00436116	0.000798411	up	3.576	3.576	1.83835	Unknown	6666666.414137.rna.23
CUST_5201_PI443154341	0.00541643	0.00122304	up	4.07381	4.07381	2.02638	Unknown	6666666.414137.peg.5113
CUST_549_PI443154341	0.000661713	6.38808e-07	up	34.1523	34.1523	5.09391	Unknown	6666666.414137.peg.539
CUST_5756_PI443154341	0.00322701	0.000417967	down	2.09423	-2.09423	-1.06642	Unknown	6666666.414137.peg.5668
CUST_4242_PI443154341	0.00694235	0.00192013	up	2.38366	2.38366	1.25318	Unknown	6666666.414137.peg.4162
CUST_3963_PI443154341	0.00199633	0.000112529	up	2.25726	2.25726	1.17457	Unknown	6666666.414137.peg.3888
CUST_1646_PI443154341	0.0274217	0.0143241	up	2.56479	2.56479	1.35884	Unknown	6666666.414137.peg.1616
CUST_4557_PI443154341	0.00131346	3.47521e-05	up	8.86141	8.86141	3.14754	Unknown	6666666.414137.peg.4474
CUST_860_PI443154341	0.00204792	0.000122684	up	2.20258	2.20258	1.1392	Unknown	6666666.414137.peg.845
CUST_4373_PI443154341	0.0052116	0.00113225	down	2.72355	-2.72355	-1.44549	Unknown	6666666.414137.peg.4293
CUST_1913_PI443154341	0.00280121	0.000302448	down	2.2528	-2.2528	-1.17172	Unknown	6666666.414137.peg.1882
CUST_5974_PI443154341	0.0208051	0.00991535	up	2.62029	2.62029	1.38972	Unknown	6666666.414137.peg.5883
CUST_5923_PI443154341	0.00518018	0.00112031	up	2.29032	2.29032	1.19555	Unknown	6666666.414137.peg.5833
CUST_5122_PI443154341	0.00173601	7.64157e-05	down	2.42191	-2.42191	-1.27614	Unknown	6666666.414137.peg.5036
(+)E1A_r60_a20	0.00203552	0.000119323	down	2.23984	-2.23984	-1.16339	Unknown	#N/A
CUST_2162_PI443154341	0.0325596	0.0179573	down	4.27462	-4.27462	-2.0958	Unknown	6666666.414137.peg.2128
CUST_2809_PI443154341	0.00324822	0.000429787	up	9.74028	9.74028	3.28396	Unknown	6666666.414137.peg.2759
CUST_737_PI443154341	0.00146022	4.28289e-05	up	5.10674	5.10674	2.3524	Unknown	6666666.414137.peg.726
CUST_4533_PI443154341	0.00124688	3.04788e-05	down	6.50119	-6.50119	-2.7007	Unknown	6666666.414137.peg.4450
CUST_2052_PI443154341	0.00165181	6.15769e-05	down	2.49773	-2.49773	-1.32062	Unknown	6666666.414137.peg.2019
CUST_1335_PI443154341	0.00989293	0.00343854	up	2.00805	2.00805	1.0058	Unknown	6666666.414137.peg.1315
CUST_1673_PI443154341	0.00268609	0.000277676	down	2.25767	-2.25767	-1.17483	Unknown	6666666.414137.peg.1643
CUST_5049_PI443154341	0.00449523	0.000843077	up	2.23829	2.23829	1.1624	Unknown	6666666.414137.peg.4964
CUST_2971_PI443154341	0.000917137	9.24554e-06	up	57.2095	57.2095	5.83818	Unknown	6666666.414137.peg.2919
CUST_472_PI443154341	0.00288809	0.000320558	up	2.49544	2.49544	1.3193	Unknown	6666666.414137.peg.462
CUST_4161_PI443154341	0.00168008	7.01298e-05	up	10.2519	10.2519	3.35782	Unknown	6666666.414137.peg.4081
CUST_293_PI443154341	0.00116069	2.11621e-05	up	3.67521	3.67521	1.87783	Unknown	6666666.414137.peg.286
CUST_3989_PI443154341	0.00166216	6.36455e-05	down	4.89942	-4.89942	-2.29261	Unknown	6666666.414137.peg.3913
CUST_1862_PI443154341	0.0447028	0.0268804	up	2.23714	2.23714	1.16165	Unknown	6666666.414137.peg.1831
CUST_3691_PI443154341	0.00455943	0.000872924	up	2.40299	2.40299	1.26483	Unknown	6666666.414137.peg.3619
CUST_2316_PI443154341	0.00118797	2.538e-05	up	8.23262	8.23262	3.04135	Unknown	6666666.414137.peg.2281
CUST_1278_PI443154341	0.00258773	0.000247164	up	9.54079	9.54079	3.25411	Unknown	6666666.414137.peg.1258
CUST_599_PI443154341	0.000917137	7.55308e-06	up	12.8943	12.8943	3.68866	Unknown	6666666.414137.peg.589
CUST_3215_PI443154341	0.00373407	0.000565066	up	3.19281	3.19281	1.67483	Unknown	6666666.414137.peg.3157
CUST_5285_PI443154341	0.00106062	1.79577e-05	up	114.212	114.212	6.83557	Unknown	6666666.414137.peg.5197
CUST_297_PI443154341	0.0114143	0.00423577	up	3.05663	3.05663	1.61194	Unknown	6666666.414137.peg.290
CUST_5805_PI443154341	0.0205245	0.00974968	up	2.6029	2.6029	1.38012	Unknown	6666666.414137.peg.5716
CUST_1587_PI443154341	0.00124688	3.04631e-05	up	26.406	26.406	4.72279	Unknown	6666666.414137.peg.1559
CUST_609_PI443154341	0.0122437	0.00470835	up	4.88831	4.88831	2.28934	Unknown	6666666.414137.peg.599
CUST_3653_PI443154341	0.0090108	0.00297201	up	2.07413	2.07413	1.0525	Unknown	6666666.414137.peg.3581
CUST_19_PI443154341	0.00106062	1.73229e-05	down	4.79484	-4.79484	-2.26148	Unknown	6666666.414137.peg.18
CUST_3762_PI443154341	0.0105612	0.00379274	down	2.25366	-2.25366	-1.17227	Unknown	6666666.414137.peg.3688
CUST_3682_PI443154341	0.00397779	0.000648215	down	2.0848	-2.0848	-1.05991	Unknown	6666666.414137.peg.3610
CUST_5265_PI443154341	0.00220198	0.00014115	up	2.39476	2.39476	1.25988	Unknown	6666666.414137.peg.5177
CUST_10_PI443154341	0.0131443	0.00524262	up	2.61347	2.61347	1.38596	Unknown	6666666.414137.peg.9
CUST_1372_PI443154341	0.00386593	0.000606731	up	2.24483	2.24483	1.1666	Unknown	6666666.414137.peg.1352
CUST_1539_PI443154341	0.0366227	0.0209866	up	2.07804	2.07804	1.05522	Unknown	6666666.414137.peg.1511
CUST_310_PI443154341	0.0012002	2.74161e-05	up	18.5839	18.5839	4.21598	Unknown	6666666.414137.peg.303
CUST_1253_PI443154341	0.0023683	0.000162687	down	2.18665	-2.18665	-1.12872	Unknown	6666666.414137.repeat.10
CUST_3705_PI443154341	0.00120772	2.83819e-05	up	3.18131	3.18131	1.66962	Unknown	6666666.414137.peg.3632
CUST_942_PI443154341	0.0125496	0.00491449	up	3.22098	3.22098	1.6875	Unknown	6666666.414137.peg.927
CUST_511_PI443154341	0.00159625	5.71116e-05	down	5.011	-5.011	-2.3251	Unknown	6666666.414137.peg.501
CUST_1271_PI443154341	0.00245383	0.000192978	down	2.13478	-2.13478	-1.09409	Unknown	6666666.414137.peg.1251
CUST_2936_PI443154341	0.0103866	0.00369759	up	2.81016	2.81016	1.49065	Unknown	6666666.414137.peg.2884
CUST_255_PI443154341	0.00886162	0.00291082	up	36.0527	36.0527	5.17203	Unknown	6666666.414137.peg.248
CUST_4191_PI443154341	0.0023962	0.000167805	up	2.09445	2.09445	1.06657	Unknown	6666666.414137.peg.4111
CUST_5302_PI443154341	0.00165181	6.27062e-05	down	2.74504	-2.74504	-1.45683	Unknown	6666666.414137.peg.5214
CUST_67_PI443154341	0.00245383	0.000190362	down	3.9368	-3.9368	-1.97702	Unknown	6666666.414137.peg.66
CUST_3634_PI443154341	0.000773776	2.58322e-06	up	21.2902	21.2902	4.41212	Unknown	6666666.414137.peg.3562
CUST_3425_PI443154341	0.00236688	0.000159926	down	5.07789	-5.07789	-2.34423	Unknown	6666666.414137.peg.3358
CUST_736_PI443154341	0.00245383	0.000193961	up	11.8987	11.8987	3.57273	Unknown	6666666.414137.peg.725
CUST_2763_PI443154341	0.00199843	0.000114618	down	2.32928	-2.32928	-1.21988	Unknown	6666666.414137.peg.2715
CUST_1227_PI443154341	0.00117186	2.33024e-05	up	8.71847	8.71847	3.12407	Unknown	6666666.414137.peg.1208
CUST_4422_PI443154341	0.00413439	0.000698772	up	6.26806	6.26806	2.64802	Unknown	6666666.414137.peg.4342
CUST_2368_PI443154341	0.00220198	0.000141491	up	2.45056	2.45056	1.29311	Unknown	6666666.414137.peg.2333
CUST_3646_PI443154341	0.0114041	0.0042243	up	2.6338	2.6338	1.39714	Unknown	6666666.414137.peg.3574
CUST_3811_PI443154341	0.00197201	0.000107594	down	2.43761	-2.43761	-1.28547	Unknown	6666666.414137.peg.3737
CUST_2814_PI443154341	0.0127809	0.00505355	up	2.48188	2.48188	1.31143	Unknown	6666666.414137.peg.2764
CUST_725_PI443154341	0.00268609	0.000278541	up	2.83153	2.83153	1.50158	Unknown	6666666.414137.peg.714
CUST_2914_PI443154341	0.00334376	0.000451696	down	2.35731	-2.35731	-1.23714	Unknown	6666666.414137.peg.2863
CUST_2562_PI443154341	0.000917137	8.58697e-06	down	6.52498	-6.52498	-2.70597	Unknown	6666666.414137.peg.2517
CUST_3582_PI443154341	0.00183497	9.12529e-05	up	6.60589	6.60589	2.72375	Unknown	6666666.414137.peg.3510
CUST_5203_PI443154341	0.00777134	0.00231544	down	2.16244	-2.16244	-1.11266	Unknown	6666666.414137.peg.5115
CUST_5246_PI443154341	0.0170065	0.00748454	down	2.31198	-2.31198	-1.20913	Unknown	6666666.414137.peg.5158
CUST_510_PI443154341	0.00118797	2.61936e-05	down	3.18458	-3.18458	-1.6711	Unknown	6666666.414137.peg.500
CUST_3099_PI443154341	0.00328061	0.000438852	down	2.09192	-2.09192	-1.06483	Unknown	6666666.414137.peg.3042
CUST_251_PI443154341	0.00454566	0.000865818	up	2.12629	2.12629	1.08834	Unknown	6666666.414137.peg.244
CUST_3463_PI443154341	0.00146022	4.4321e-05	up	22.253	22.253	4.47593	Unknown	6666666.414137.peg.3395
CUST_188_PI443154341	0.000773776	1.86759e-06	up	59.6982	59.6982	5.89961	Unknown	6666666.414137.peg.184
CUST_5337_PI443154341	0.00159625	5.77201e-05	up	2.82567	2.82567	1.49859	Unknown	6666666.414137.peg.5249
CUST_5211_PI443154341	0.00166726	6.43599e-05	up	6.07186	6.07186	2.60214	Unknown	6666666.414137.peg.5123
CUST_565_PI443154341	0.000917137	7.46896e-06	up	28.4117	28.4117	4.82841	Unknown	6666666.414137.peg.555
CUST_2067_PI443154341	0.00491123	0.00101937	up	2.90173	2.90173	1.53691	Unknown	6666666.414137.peg.2034
CUST_119_PI443154341	0.00466385	0.000909769	up	2.83261	2.83261	1.50213	Unknown	6666666.414137.peg.116
CUST_2163_PI443154341	0.0219209	0.0106864	down	3.13971	-3.13971	-1.65063	Unknown	6666666.414137.peg.2129
CUST_4562_PI443154341	0.00590267	0.00141528	up	2.58596	2.58596	1.3707	Unknown	6666666.414137.peg.4479
CUST_2943_PI443154341	0.0139106	0.00566942	up	20.7361	20.7361	4.37408	Unknown	6666666.414137.peg.2891
CUST_5984_PI443154341	0.00603346	0.00147837	up	4.08718	4.08718	2.0311	Unknown	6666666.414137.peg.5893
CUST_30_PI443154341	0.00203552	0.000120667	down	3.20736	-3.20736	-1.68139	Unknown	6666666.414137.peg.29
CUST_2536_PI443154341	0.0462358	0.0280074	up	2.7739	2.7739	1.47191	Unknown	6666666.414137.peg.2492
CUST_1726_PI443154341	0.0030585	0.0003716	up	2.00131	2.00131	1.00095	Unknown	6666666.414137.peg.1696
CUST_1145_PI443154341	0.00245383	0.000192685	up	19.1467	19.1467	4.25902	Unknown	6666666.414137.peg.1126
CUST_5283_PI443154341	0.00255015	0.000217967	up	22.7189	22.7189	4.50582	Unknown	6666666.414137.peg.5195
CUST_218_PI443154341	0.00102263	1.4776e-05	up	30.7551	30.7551	4.94275	Unknown	6666666.414137.peg.211
CUST_420_PI443154341	0.00500028	0.00105593	down	5.34816	-5.34816	-2.41904	Unknown	6666666.414137.peg.413
CUST_5709_PI443154341	0.00516935	0.00111373	down	2.26426	-2.26426	-1.17904	Unknown	6666666.414137.peg.5621
CUST_2324_PI443154341	0.00421746	0.000739207	up	5.8211	5.8211	2.54129	Unknown	6666666.414137.peg.2289
CUST_1144_PI443154341	0.0018802	9.78051e-05	up	2.79256	2.79256	1.48159	Unknown	6666666.414137.peg.1125
CUST_5655_PI443154341	0.00308043	0.000376998	down	2.04652	-2.04652	-1.03317	Unknown	6666666.414137.peg.5567
CUST_3406_PI443154341	0.0023962	0.000168147	up	2.91984	2.91984	1.54589	Unknown	6666666.414137.peg.3341
CUST_3478_PI443154341	0.00117997	2.42919e-05	up	12.7628	12.7628	3.67387	Unknown	6666666.414137.peg.3408
CUST_568_PI443154341	0.00117932	2.38384e-05	up	8.02421	8.02421	3.00436	Unknown	6666666.414137.peg.558
CUST_2164_PI443154341	0.0350981	0.0198506	down	2.43423	-2.43423	-1.28347	Unknown	6666666.414137.peg.2130
CUST_3810_PI443154341	0.0075458	0.00219119	up	2.79635	2.79635	1.48355	Unknown	6666666.414137.peg.3736
CUST_399_PI443154341	0.00717003	0.0020241	up	2.89524	2.89524	1.53368	Unknown	#N/A
CUST_523_PI443154341	0.00397779	0.000648475	up	3.76981	3.76981	1.91449	Unknown	6666666.414137.peg.513
CUST_3271_PI443154341	0.00196567	0.000106001	down	2.25944	-2.25944	-1.17596	Unknown	6666666.414137.peg.3213
CUST_857_PI443154341	0.0336071	0.0187172	up	2.47749	2.47749	1.30888	Unknown	6666666.414137.peg.842
CUST_4394_PI443154341	0.011851	0.00449889	up	6.70017	6.70017	2.7442	Unknown	6666666.414137.peg.4314
CUST_4230_PI443154341	0.0108534	0.00393292	up	2.08502	2.08502	1.06006	Unknown	6666666.414137.peg.4150
CUST_2713_PI443154341	0.00248222	0.000200837	down	2.03443	-2.03443	-1.02463	Unknown	6666666.414137.peg.2666
CUST_453_PI443154341	0.00617069	0.00155022	up	2.94182	2.94182	1.55671	Unknown	6666666.414137.peg.443
CUST_3965_PI443154341	0.00367345	0.000544309	up	2.7273	2.7273	1.44747	Unknown	6666666.414137.peg.3890
(+)E1A_r60_a22	0.00513482	0.00110038	down	8.99058	-8.99058	-3.16841	Unknown	#N/A
CUST_4809_PI443154341	0.00474248	0.000940703	down	2.00381	-2.00381	-1.00275	Unknown	6666666.414137.peg.4724
CUST_5843_PI443154341	0.00147977	4.62047e-05	up	3.84701	3.84701	1.94374	Unknown	6666666.414137.peg.5754
CUST_5918_PI443154341	0.00286482	0.000315436	up	4.03356	4.03356	2.01205	Unknown	6666666.414137.peg.5828
CUST_4817_PI443154341	0.0027891	0.000300611	up	3.22993	3.22993	1.6915	Unknown	6666666.414137.peg.4732
CUST_2527_PI443154341	0.0125496	0.00491672	up	2.44479	2.44479	1.28971	Unknown	6666666.414137.peg.2483
CUST_2062_PI443154341	0.00282898	0.000309165	up	2.22376	2.22376	1.153	Unknown	6666666.414137.peg.2029
CUST_479_PI443154341	0.00549235	0.00125214	up	2.34552	2.34552	1.22991	Unknown	6666666.414137.peg.469
CUST_1033_PI443154341	0.00241484	0.000173364	up	2.32291	2.32291	1.21593	Unknown	6666666.414137.peg.1017
CUST_5045_PI443154341	0.00384437	0.000596676	down	2.4591	-2.4591	-1.29813	Unknown	6666666.414137.peg.4960
CUST_4689_PI443154341	0.0034025	0.000470493	up	4.69772	4.69772	2.23196	Unknown	6666666.414137.peg.4606
CUST_4864_PI443154341	0.00166822	6.57307e-05	down	2.6368	-2.6368	-1.39879	Unknown	6666666.414137.peg.4779
CUST_841_PI443154341	0.00262336	0.000260827	up	4.87258	4.87258	2.28469	Unknown	6666666.414137.peg.826
CUST_1658_PI443154341	0.00549235	0.00125318	up	3.20793	3.20793	1.68164	Unknown	6666666.414137.peg.1628
CUST_616_PI443154341	0.0099038	0.00344721	up	2.46628	2.46628	1.30234	Unknown	6666666.414137.peg.606
CUST_587_PI443154341	0.00116069	2.11728e-05	up	3.45358	3.45358	1.78809	Unknown	6666666.414137.peg.577
CUST_3132_PI443154341	0.00413439	0.000699438	down	2.0049	-2.0049	-1.00353	Unknown	6666666.414137.peg.3074
CUST_3543_PI443154341	0.00660429	0.00174899	up	2.98146	2.98146	1.57602	Unknown	6666666.414137.peg.3471
CUST_3737_PI443154341	0.00428426	0.000770251	up	2.36915	2.36915	1.24437	Unknown	6666666.414137.peg.3664
CUST_1721_PI443154341	0.00102263	1.39881e-05	up	8.48885	8.48885	3.08557	Unknown	6666666.414137.peg.1691
CUST_2555_PI443154341	0.00183704	9.22603e-05	up	4.9827	4.9827	2.31693	Unknown	6666666.414137.peg.2511
CUST_720_PI443154341	0.0430388	0.0256394	up	6.37348	6.37348	2.67208	Unknown	6666666.414137.peg.709
CUST_4432_PI443154341	0.00365622	0.000539996	up	2.9873	2.9873	1.57884	Unknown	6666666.414137.peg.4352
CUST_4942_PI443154341	0.00302011	0.000355365	up	2.84083	2.84083	1.50631	Unknown	6666666.414137.peg.4857
CUST_5518_PI443154341	0.00167865	6.94191e-05	down	2.42603	-2.42603	-1.27859	Unknown	6666666.414137.peg.5430
CUST_5686_PI443154341	0.00102263	1.52281e-05	up	94.9448	94.9448	6.56902	Unknown	6666666.414137.peg.5598
CUST_3854_PI443154341	0.012043	0.00458961	down	2.1547	-2.1547	-1.10749	Unknown	6666666.414137.peg.3780
CUST_4336_PI443154341	0.000773776	2.08607e-06	up	12.2208	12.2208	3.61127	Unknown	6666666.414137.peg.4256
CUST_5439_PI443154341	0.0285518	0.0151414	up	2.74637	2.74637	1.45753	Unknown	6666666.414137.peg.5351
CUST_4729_PI443154341	0.00117042	2.29276e-05	down	3.3432	-3.3432	-1.74123	Unknown	6666666.414137.peg.4646
CUST_2721_PI443154341	0.0192011	0.00891732	up	3.52659	3.52659	1.81827	Unknown	6666666.414137.peg.2673
CUST_3324_PI443154341	0.00182692	9.037e-05	up	2.69802	2.69802	1.4319	Unknown	6666666.414137.peg.3261
CUST_498_PI443154341	0.00269671	0.000281415	up	3.01582	3.01582	1.59255	Unknown	6666666.414137.peg.488
CUST_1183_PI443154341	0.00198298	0.000109496	down	2.19344	-2.19344	-1.13319	Unknown	6666666.414137.peg.1164
CUST_229_PI443154341	0.0356249	0.0202099	down	2.85505	-2.85505	-1.51352	Unknown	6666666.414137.peg.222
CUST_3937_PI443154341	0.00199904	0.00011531	up	2.42005	2.42005	1.27503	Unknown	6666666.414137.peg.3863
CUST_4788_PI443154341	0.0263406	0.0136226	up	4.82095	4.82095	2.26932	Unknown	6666666.414137.peg.4703
CUST_4183_PI443154341	0.00237912	0.000164212	up	2.34957	2.34957	1.23239	Unknown	6666666.414137.peg.4103
CUST_4566_PI443154341	0.000917137	1.08683e-05	down	6.01597	-6.01597	-2.5888	Unknown	6666666.414137.peg.4483
CUST_5540_PI443154341	0.00150305	4.71786e-05	up	2.68014	2.68014	1.42231	Unknown	6666666.414137.peg.5452
CUST_3479_PI443154341	0.00117997	2.41299e-05	up	3.24984	3.24984	1.70037	Unknown	6666666.414137.repeat.34
CUST_1259_PI443154341	0.0297188	0.0159509	up	2.816	2.816	1.49365	Unknown	6666666.414137.peg.1239
CUST_5531_PI443154341	0.00932962	0.00314923	up	2.29324	2.29324	1.19738	Unknown	6666666.414137.peg.5443
CUST_6_PI443154341	0.00690396	0.00190497	up	5.3146	5.3146	2.40996	Unknown	6666666.414137.peg.5
CUST_1695_PI443154341	0.00203552	0.000118765	down	2.75083	-2.75083	-1.45987	Unknown	6666666.414137.peg.1665
CUST_8_PI443154341	0.00384765	0.000599437	up	2.39787	2.39787	1.26176	Unknown	6666666.414137.peg.7
CUST_4296_PI443154341	0.00337426	0.000461917	up	2.355	2.355	1.23572	Unknown	6666666.414137.peg.4216
CUST_4680_PI443154341	0.0277492	0.0145429	up	5.40803	5.40803	2.4351	Unknown	6666666.414137.peg.4597
CUST_1675_PI443154341	0.00183497	9.13714e-05	down	3.46823	-3.46823	-1.7942	Unknown	6666666.414137.peg.1645
CUST_1117_PI443154341	0.0011963	2.71306e-05	down	3.4036	-3.4036	-1.76706	Unknown	6666666.414137.peg.1100
CUST_3745_PI443154341	0.00532807	0.00118382	up	3.93951	3.93951	1.97802	Unknown	6666666.414137.peg.3672
CUST_4983_PI443154341	0.00177241	8.47609e-05	down	2.29071	-2.29071	-1.19579	Unknown	6666666.414137.peg.4898
CUST_1148_PI443154341	0.000883675	6.18687e-06	up	40.094	40.094	5.32531	Unknown	6666666.414137.peg.1129
CUST_4433_PI443154341	0.00183704	9.2608e-05	up	2.44629	2.44629	1.29059	Unknown	6666666.414137.peg.4353
CUST_966_PI443154341	0.00575315	0.00135391	up	3.42674	3.42674	1.77684	Unknown	6666666.414137.peg.951
CUST_447_PI443154341	0.0329967	0.0182905	up	2.18601	2.18601	1.1283	Unknown	6666666.414137.peg.437
CUST_311_PI443154341	0.00293797	0.000337009	up	6.03636	6.03636	2.59368	Unknown	6666666.414137.peg.304
CUST_5979_PI443154341	0.00102263	1.51779e-05	up	13.4062	13.4062	3.74483	Unknown	6666666.414137.peg.5888
CUST_3952_PI443154341	0.00135585	3.78792e-05	up	3.1297	3.1297	1.64602	Unknown	6666666.414137.peg.3878
CUST_2381_PI443154341	0.00211318	0.000127798	down	2.27932	-2.27932	-1.1886	Unknown	6666666.414137.peg.2345
CUST_567_PI443154341	0.00293797	0.00033441	up	10.9571	10.9571	3.4538	Unknown	6666666.414137.peg.557
CUST_1470_PI443154341	0.00198395	0.000109875	down	2.55397	-2.55397	-1.35274	Unknown	6666666.414137.peg.1447
CUST_4295_PI443154341	0.0023858	0.000165167	up	2.67568	2.67568	1.41991	Unknown	6666666.414137.peg.4215
CUST_3581_PI443154341	0.00248222	0.000201107	up	2.70677	2.70677	1.43657	Unknown	6666666.414137.peg.3509
CUST_4758_PI443154341	0.00257147	0.000236257	down	2.45477	-2.45477	-1.29559	Unknown	6666666.414137.peg.4673
CUST_1239_PI443154341	0.0112338	0.0041372	up	2.11776	2.11776	1.08254	Unknown	6666666.414137.peg.1220
CUST_5795_PI443154341	0.0156962	0.0066809	up	3.33038	3.33038	1.73569	Unknown	6666666.414137.peg.5706
CUST_3266_PI443154341	0.000917137	1.11227e-05	down	4.83319	-4.83319	-2.27298	Unknown	6666666.414137.peg.3208
CUST_5207_PI443154341	0.0034557	0.000482719	up	4.12592	4.12592	2.04472	Unknown	6666666.414137.peg.5119
CUST_1677_PI443154341	0.00127088	3.1537e-05	down	3.30756	-3.30756	-1.72577	Unknown	6666666.414137.peg.1647
CUST_4743_PI443154341	0.00102263	1.48764e-05	up	4.78814	4.78814	2.25947	Unknown	6666666.414137.peg.4660
CUST_5675_PI443154341	0.0024457	0.000184087	up	2.69239	2.69239	1.42889	Unknown	6666666.414137.peg.5587
CUST_957_PI443154341	0.024269	0.0122442	up	2.32088	2.32088	1.21467	Unknown	6666666.414137.peg.942
CUST_5368_PI443154341	0.00189046	9.94163e-05	down	2.80486	-2.80486	-1.48793	Unknown	6666666.414137.peg.5280
CUST_3940_PI443154341	0.003889	0.000615084	up	3.7359	3.7359	1.90146	Unknown	6666666.414137.peg.3866
CUST_3525_PI443154341	0.00167354	6.79315e-05	up	5.46711	5.46711	2.45078	Unknown	6666666.414137.peg.3453
CUST_575_PI443154341	0.00245383	0.00019124	up	11.9484	11.9484	3.57874	Unknown	6666666.414137.peg.565
CUST_4495_PI443154341	0.00245383	0.000190944	up	3.73009	3.73009	1.89921	Unknown	6666666.414137.peg.4413
CUST_198_PI443154341	0.00382624	0.000584878	up	3.17924	3.17924	1.66868	Unknown	6666666.414137.peg.194
CUST_4802_PI443154341	0.00363268	0.000531494	down	2.8088	-2.8088	-1.48995	Unknown	6666666.414137.peg.4717
CUST_3583_PI443154341	0.00167865	6.91328e-05	up	3.37522	3.37522	1.75498	Unknown	6666666.414137.peg.3511
CUST_646_PI443154341	0.00687132	0.00189258	up	2.21658	2.21658	1.14834	Unknown	6666666.414137.peg.635
CUST_903_PI443154341	0.00504296	0.00106992	up	2.04158	2.04158	1.02969	Unknown	6666666.414137.peg.888
CUST_5963_PI443154341	0.00168152	7.15715e-05	down	2.60351	-2.60351	-1.38046	Unknown	6666666.414137.peg.5872
CUST_5244_PI443154341	0.00274223	0.000289771	down	2.06095	-2.06095	-1.04331	Unknown	6666666.414137.peg.5156
CUST_656_PI443154341	0.00759515	0.00221426	down	2.50815	-2.50815	-1.32662	Unknown	6666666.414137.peg.645
CUST_1534_PI443154341	0.0017053	7.34247e-05	down	3.1138	-3.1138	-1.63868	Unknown	6666666.414137.peg.1506
CUST_981_PI443154341	0.00255015	0.000220973	up	3.90709	3.90709	1.96609	Unknown	6666666.414137.peg.966
CUST_1533_PI443154341	0.00257147	0.00023325	down	2.79653	-2.79653	-1.48364	Unknown	6666666.414137.peg.1505
CUST_4226_PI443154341	0.00116069	2.11431e-05	up	3.80213	3.80213	1.92681	Unknown	6666666.414137.peg.4146
CUST_502_PI443154341	0.00635316	0.00162353	up	2.37519	2.37519	1.24804	Unknown	6666666.414137.peg.492
CUST_3476_PI443154341	0.00267168	0.000272217	up	5.85667	5.85667	2.55008	Unknown	6666666.414137.repeat.33
CUST_3167_PI443154341	0.00424253	0.000752987	up	3.96846	3.96846	1.98858	Unknown	6666666.414137.peg.3109
CUST_2801_PI443154341	0.00118797	2.6356e-05	up	12.974	12.974	3.69755	Unknown	6666666.414137.peg.2751
CUST_5281_PI443154341	0.00974333	0.00336253	up	2.74321	2.74321	1.45586	Unknown	6666666.414137.peg.5193
CUST_5482_PI443154341	0.00601944	0.00147362	up	4.86699	4.86699	2.28303	Unknown	6666666.414137.peg.5394
CUST_5303_PI443154341	0.00186721	9.60453e-05	down	2.5346	-2.5346	-1.34176	Unknown	6666666.414137.peg.5215
CUST_4861_PI443154341	0.00168152	7.06008e-05	down	2.37965	-2.37965	-1.25075	Unknown	6666666.414137.peg.4776
CUST_700_PI443154341	0.0341596	0.0190979	down	2.79923	-2.79923	-1.48503	Unknown	6666666.414137.peg.689
CUST_4998_PI443154341	0.00257147	0.000228723	down	2.14421	-2.14421	-1.10045	Unknown	6666666.414137.peg.4913
CUST_541_PI443154341	0.00165181	6.25929e-05	up	24.0143	24.0143	4.58582	Unknown	6666666.414137.peg.531
CUST_5752_PI443154341	0.00314959	0.000396998	down	2.98746	-2.98746	-1.57892	Unknown	6666666.414137.peg.5664
CUST_5074_PI443154341	0.00156836	5.25795e-05	up	3.71523	3.71523	1.89345	Unknown	6666666.414137.peg.4988
CUST_2537_PI443154341	0.0116566	0.00437529	up	2.09956	2.09956	1.07009	Unknown	6666666.414137.peg.2493
CUST_2855_PI443154341	0.00591663	0.00142058	up	2.61174	2.61174	1.38501	Unknown	6666666.414137.peg.2804
CUST_1229_PI443154341	0.0384924	0.0223427	up	2.03842	2.03842	1.02745	Unknown	6666666.414137.peg.1210
CUST_371_PI443154341	0.0150611	0.0063289	up	3.17629	3.17629	1.66734	Unknown	6666666.414137.peg.364
CUST_4397_PI443154341	0.00546769	0.00124187	up	5.50136	5.50136	2.45979	Unknown	6666666.414137.peg.4317
CUST_3411_PI443154341	0.0028232	0.000307479	down	2.68485	-2.68485	-1.42484	Unknown	6666666.414137.peg.3346
CUST_2743_PI443154341	0.00203552	0.000119052	down	2.2355	-2.2355	-1.1606	Unknown	6666666.414137.peg.2695
CUST_2817_PI443154341	0.00264078	0.000266899	up	4.04577	4.04577	2.01642	Unknown	6666666.414137.rna.32
CUST_172_PI443154341	0.00286674	0.000316119	up	2.84908	2.84908	1.5105	Unknown	6666666.414137.peg.168
CUST_5512_PI443154341	0.00838314	0.00262627	up	2.45821	2.45821	1.29761	Unknown	6666666.414137.peg.5424
CUST_3327_PI443154341	0.0158501	0.00677245	up	2.32461	2.32461	1.21699	Unknown	6666666.414137.peg.3264
CUST_5082_PI443154341	0.00262484	0.000261804	down	2.43429	-2.43429	-1.2835	Unknown	6666666.414137.peg.4996
CUST_2275_PI443154341	0.00257147	0.000231649	down	2.07624	-2.07624	-1.05397	Unknown	6666666.414137.peg.2241
CUST_5160_PI443154341	0.00956173	0.00327157	down	2.38271	-2.38271	-1.2526	Unknown	6666666.414137.peg.5072
CUST_3086_PI443154341	0.0300008	0.0161664	up	3.01184	3.01184	1.59065	Unknown	#N/A
CUST_5284_PI443154341	0.00165181	6.16545e-05	up	25.1567	25.1567	4.65287	Unknown	6666666.414137.peg.5196
CUST_4710_PI443154341	0.00245074	0.000185668	down	2.16816	-2.16816	-1.11647	Unknown	6666666.414137.peg.4627
CUST_4784_PI443154341	0.00116752	2.16199e-05	down	4.4372	-4.4372	-2.14965	Unknown	6666666.414137.peg.4699
CUST_458_PI443154341	0.0163124	0.00704772	up	3.09943	3.09943	1.632	Unknown	6666666.414137.peg.448
CUST_2185_PI443154341	0.00493773	0.00103542	up	3.09814	3.09814	1.6314	Unknown	6666666.414137.peg.2151
CUST_1241_PI443154341	0.00259602	0.000253217	up	2.5868	2.5868	1.37117	Unknown	6666666.414137.peg.1222
CUST_3684_PI443154341	0.00257147	0.000234535	up	2.03865	2.03865	1.02761	Unknown	6666666.414137.peg.3612
CUST_4398_PI443154341	0.00492601	0.00103054	up	5.92339	5.92339	2.56642	Unknown	6666666.414137.peg.4318
CUST_2980_PI443154341	0.00354491	0.000509162	up	5.31756	5.31756	2.41077	Unknown	6666666.414137.peg.2928
CUST_3939_PI443154341	0.00245074	0.000185597	up	4.27519	4.27519	2.09599	Unknown	6666666.414137.peg.3865
CUST_1147_PI443154341	0.00179804	8.71059e-05	up	27.0718	27.0718	4.75872	Unknown	6666666.414137.peg.1128
CUST_2977_PI443154341	0.0111449	0.00408534	up	5.01804	5.01804	2.32713	Unknown	6666666.414137.peg.2925
CUST_795_PI443154341	0.00501439	0.00106017	down	2.28724	-2.28724	-1.19361	Unknown	6666666.414137.peg.782
CUST_3971_PI443154341	0.0188745	0.00867576	up	3.73909	3.73909	1.90269	Unknown	6666666.414137.repeat.38
CUST_774_PI443154341	0.0199091	0.00934434	up	2.92584	2.92584	1.54885	Unknown	6666666.414137.peg.761
CUST_5198_PI443154341	0.00257147	0.000232127	up	2.46218	2.46218	1.29994	Unknown	6666666.414137.peg.5110
CUST_3528_PI443154341	0.00118797	2.55101e-05	down	3.56687	-3.56687	-1.83466	Unknown	6666666.414137.peg.3456
CUST_3224_PI443154341	0.00239299	0.000167136	up	2.36978	2.36978	1.24475	Unknown	6666666.414137.peg.3166
CUST_5286_PI443154341	0.00183704	9.32858e-05	up	26.6654	26.6654	4.7369	Unknown	6666666.414137.peg.5198
CUST_508_PI443154341	0.00106062	1.77948e-05	down	6.31873	-6.31873	-2.65963	Unknown	6666666.414137.peg.498
CUST_1659_PI443154341	0.0245064	0.0124173	up	2.82105	2.82105	1.49623	Unknown	6666666.414137.peg.1629
CUST_5685_PI443154341	0.000773776	2.79755e-06	up	34.4405	34.4405	5.10603	Unknown	6666666.414137.peg.5597
CUST_4184_PI443154341	0.00139767	3.97366e-05	up	2.881	2.881	1.52657	Unknown	6666666.414137.peg.4104
CUST_545_PI443154341	0.000892858	7.04309e-06	up	32.5245	32.5245	5.02346	Unknown	6666666.414137.peg.535
CUST_182_PI443154341	0.00528258	0.00115722	down	2.0222	-2.0222	-1.01593	Unknown	6666666.414137.peg.178
CUST_401_PI443154341	0.00813152	0.00249224	up	2.7716	2.7716	1.47072	Unknown	6666666.414137.peg.394
CUST_3059_PI443154341	0.00363268	0.000533674	down	2.07607	-2.07607	-1.05386	Unknown	6666666.414137.peg.3003
CUST_5106_PI443154341	0.00419715	0.000727	up	2.66877	2.66877	1.41617	Unknown	6666666.414137.peg.5020
CUST_3329_PI443154341	0.00203552	0.000120723	up	3.07055	3.07055	1.6185	Unknown	6666666.414137.peg.3266
CUST_2419_PI443154341	0.0108578	0.00393984	down	2.05146	-2.05146	-1.03665	Unknown	6666666.414137.peg.2381
CUST_4690_PI443154341	0.00117042	2.2888e-05	up	14.3385	14.3385	3.84182	Unknown	6666666.414137.peg.4607
CUST_4021_PI443154341	0.00354088	0.00050742	up	10.8582	10.8582	3.44071	Unknown	6666666.414137.peg.3945
CUST_6018_PI443154341	0.00135585	3.77551e-05	down	2.89604	-2.89604	-1.53408	Unknown	6666666.414137.peg.5926
CUST_1342_PI443154341	0.0137295	0.00557978	down	2.29431	-2.29431	-1.19806	Unknown	6666666.414137.peg.1322
CUST_2245_PI443154341	0.00234428	0.000156029	up	5.60063	5.60063	2.48559	Unknown	6666666.414137.peg.2211
CUST_4148_PI443154341	0.0101272	0.00356143	up	3.67981	3.67981	1.87963	Unknown	6666666.414137.peg.4068
CUST_1244_PI443154341	0.00312086	0.000387736	up	2.92723	2.92723	1.54954	Unknown	6666666.414137.peg.1225
CUST_5266_PI443154341	0.00257147	0.000236357	up	2.14859	2.14859	1.10339	Unknown	6666666.414137.peg.5178
CUST_1589_PI443154341	0.0106525	0.00383911	up	3.4502	3.4502	1.78668	Unknown	6666666.414137.peg.1561
CUST_387_PI443154341	0.00218596	0.000137959	down	2.30959	-2.30959	-1.20764	Unknown	6666666.414137.peg.380
CUST_4289_PI443154341	0.0179133	0.00807499	up	2.55977	2.55977	1.35601	Unknown	6666666.414137.peg.4209
CUST_1385_PI443154341	0.02137	0.0102583	up	3.06055	3.06055	1.61379	Unknown	6666666.414137.repeat.12
CUST_2898_PI443154341	0.00106062	1.77696e-05	down	3.55557	-3.55557	-1.83008	Unknown	6666666.414137.peg.2847
CUST_2733_PI443154341	0.0124933	0.00488236	up	3.31825	3.31825	1.73042	Unknown	6666666.414137.peg.2685
CUST_1599_PI443154341	0.00225191	0.00014766	down	2.0487	-2.0487	-1.03471	Unknown	6666666.414137.peg.1571
CUST_5065_PI443154341	0.00269237	0.000280051	down	2.01785	-2.01785	-1.01282	Unknown	6666666.414137.peg.4979
CUST_4971_PI443154341	0.0017776	8.53587e-05	down	2.48921	-2.48921	-1.31569	Unknown	6666666.414137.peg.4886
CUST_4756_PI443154341	0.00255015	0.000221278	down	3.71773	-3.71773	-1.89442	Unknown	6666666.414137.repeat.40
CUST_1653_PI443154341	0.00159625	5.68383e-05	down	2.51747	-2.51747	-1.33197	Unknown	6666666.414137.peg.1623
CUST_751_PI443154341	0.000883675	3.67314e-06	up	8.79033	8.79033	3.13592	Unknown	6666666.414137.peg.738
CUST_960_PI443154341	0.00685664	0.00188422	up	3.7327	3.7327	1.90022	Unknown	6666666.414137.peg.945
CUST_5539_PI443154341	0.00337426	0.000460937	up	5.50021	5.50021	2.45949	Unknown	6666666.414137.peg.5451
CUST_5834_PI443154341	0.00288809	0.000320264	up	2.89261	2.89261	1.53237	Unknown	6666666.414137.peg.5745
CUST_1409_PI443154341	0.0035319	0.000503811	down	3.03722	-3.03722	-1.60275	Unknown	6666666.414137.peg.1388
CUST_938_PI443154341	0.00464365	0.000898968	up	2.90106	2.90106	1.53658	Unknown	6666666.414137.peg.923
CUST_1101_PI443154341	0.00211476	0.000128589	down	2.53015	-2.53015	-1.33923	Unknown	6666666.414137.peg.1084
CUST_1755_PI443154341	0.00197695	0.000108549	up	3.02165	3.02165	1.59534	Unknown	6666666.414137.peg.1725
CUST_1491_PI443154341	0.00641229	0.00166182	up	2.14339	2.14339	1.09989	Unknown	6666666.414137.peg.1468
CUST_655_PI443154341	0.0018802	9.75707e-05	up	2.60235	2.60235	1.37982	Unknown	6666666.414137.peg.644
CUST_914_PI443154341	0.00532673	0.0011809	down	2.35637	-2.35637	-1.23657	Unknown	6666666.414137.peg.899
CUST_3948_PI443154341	0.00517021	0.00111476	up	3.51515	3.51515	1.81359	Unknown	6666666.414137.peg.3874
CUST_5054_PI443154341	0.00396063	0.000643307	up	4.48364	4.48364	2.16467	Unknown	6666666.414137.peg.4969
CUST_261_PI443154341	0.00392402	0.00062793	down	2.40512	-2.40512	-1.26611	Unknown	6666666.414137.peg.254
CUST_4294_PI443154341	0.000883675	6.07331e-06	up	16.0126	16.0126	4.00113	Unknown	6666666.414137.peg.4214
CUST_32_PI443154341	0.00361072	0.000523023	down	3.06374	-3.06374	-1.6153	Unknown	6666666.414137.peg.31
CUST_5956_PI443154341	0.00383689	0.000593347	down	2.07224	-2.07224	-1.05119	Unknown	6666666.414137.peg.5866
CUST_2313_PI443154341	0.00680183	0.00185779	up	2.18779	2.18779	1.12947	Unknown	6666666.414137.peg.2278
CUST_3246_PI443154341	0.00159625	5.64934e-05	up	6.20354	6.20354	2.63309	Unknown	6666666.414137.peg.3188
CUST_3474_PI443154341	0.000883675	4.67749e-06	up	9.45058	9.45058	3.2404	Unknown	6666666.414137.peg.3406
CUST_2497_PI443154341	0.00320311	0.000409008	up	3.30552	3.30552	1.72488	Unknown	6666666.414137.peg.2454
CUST_2806_PI443154341	0.00266049	0.00027064	up	3.95618	3.95618	1.98411	Unknown	6666666.414137.peg.2756
CUST_4967_PI443154341	0.00598091	0.0014537	up	2.79936	2.79936	1.4851	Unknown	6666666.414137.peg.4882
CUST_1009_PI443154341	0.00146653	4.55503e-05	down	2.76028	-2.76028	-1.46482	Unknown	6666666.414137.peg.993
CUST_5989_PI443154341	0.000917137	1.09366e-05	up	4.28483	4.28483	2.09924	Unknown	6666666.414137.peg.5898
CUST_5972_PI443154341	0.00615567	0.0015417	up	5.9507	5.9507	2.57306	Unknown	6666666.414137.peg.5881
CUST_3339_PI443154341	0.00249127	0.000203656	up	2.13689	2.13689	1.09551	Unknown	6666666.414137.peg.3276
CUST_4912_PI443154341	0.00159333	5.46107e-05	up	4.08456	4.08456	2.03018	Unknown	6666666.414137.peg.4827
CUST_5617_PI443154341	0.0145363	0.00602235	up	2.27237	2.27237	1.1842	Unknown	6666666.414137.peg.5529
CUST_5635_PI443154341	0.00666634	0.00178025	up	2.13657	2.13657	1.0953	Unknown	6666666.414137.peg.5547
CUST_1466_PI443154341	0.00255015	0.00021875	down	2.06818	-2.06818	-1.04836	Unknown	6666666.414137.peg.1443
CUST_2875_PI443154341	0.036815	0.0211391	up	2.27102	2.27102	1.18334	Unknown	6666666.414137.peg.2824
CUST_4724_PI443154341	0.0015336	4.93979e-05	up	3.27446	3.27446	1.71126	Unknown	6666666.414137.peg.4641
CUST_553_PI443154341	0.00294144	0.000340171	up	5.81942	5.81942	2.54088	Unknown	6666666.414137.peg.543
CUST_4679_PI443154341	0.0163115	0.00704464	up	6.7717	6.7717	2.75952	Unknown	6666666.414137.peg.4596
CUST_4130_PI443154341	0.0177607	0.00798285	up	3.23789	3.23789	1.69506	Unknown	6666666.414137.peg.4050
CUST_3368_PI443154341	0.00196567	0.000106279	down	2.21944	-2.21944	-1.15019	Unknown	6666666.414137.peg.3304
CUST_1952_PI443154341	0.00259511	0.000248636	up	3.06392	3.06392	1.61538	Unknown	6666666.414137.peg.1921
CUST_1406_PI443154341	0.00258773	0.000245801	up	2.96627	2.96627	1.56865	Unknown	#N/A
CUST_55_PI443154341	0.00392433	0.000628981	down	4.93396	-4.93396	-2.30275	Unknown	6666666.414137.peg.54
CUST_4675_PI443154341	0.00281471	0.000305603	down	3.13851	-3.13851	-1.65008	Unknown	6666666.414137.peg.4592
CUST_1076_PI443154341	0.00352645	0.000501421	up	3.00721	3.00721	1.58843	Unknown	6666666.414137.peg.1059
CUST_5754_PI443154341	0.00285395	0.000313301	down	2.53933	-2.53933	-1.34445	Unknown	6666666.414137.peg.5666
CUST_944_PI443154341	0.00253136	0.000210912	down	2.69561	-2.69561	-1.43061	Unknown	6666666.414137.peg.929
CUST_2938_PI443154341	0.00267383	0.000274693	up	3.26301	3.26301	1.7062	Unknown	6666666.414137.peg.2886
CUST_1140_PI443154341	0.000917137	1.12704e-05	up	34.021	34.021	5.08835	Unknown	6666666.414137.peg.1121
CUST_5556_PI443154341	0.00235363	0.000157038	up	2.04564	2.04564	1.03255	Unknown	6666666.414137.peg.5468
CUST_777_PI443154341	0.00737423	0.00211471	up	45.6777	45.6777	5.51342	Unknown	6666666.414137.peg.764
CUST_4955_PI443154341	0.00637916	0.00163856	down	2.31204	-2.31204	-1.20916	Unknown	6666666.414137.peg.4870
CUST_548_PI443154341	0.000763472	1.01557e-06	up	20.5907	20.5907	4.36392	Unknown	6666666.414137.peg.538
CUST_2747_PI443154341	0.00168152	7.15534e-05	down	4.65793	-4.65793	-2.21969	Unknown	6666666.414137.peg.2699
CUST_5908_PI443154341	0.0231903	0.0115208	up	2.12158	2.12158	1.08514	Unknown	6666666.414137.peg.5818
CUST_5793_PI443154341	0.0125496	0.00491102	up	2.83364	2.83364	1.50265	Unknown	6666666.414137.peg.5704
CUST_2827_PI443154341	0.00271479	0.000285303	up	2.19659	2.19659	1.13527	Unknown	6666666.414137.peg.2776
CUST_3748_PI443154341	0.0017776	8.55937e-05	down	2.51976	-2.51976	-1.33329	Unknown	6666666.414137.peg.3675
CUST_213_PI443154341	0.00786294	0.00235021	up	2.72722	2.72722	1.44743	Unknown	6666666.414137.repeat.3
CUST_4530_PI443154341	0.0145583	0.00604583	down	2.04481	-2.04481	-1.03197	Unknown	6666666.414137.peg.4447
CUST_238_PI443154341	0.00588181	0.00140158	up	3.44117	3.44117	1.7829	Unknown	6666666.414137.peg.231
CUST_2127_PI443154341	0.00341043	0.000475255	up	3.20149	3.20149	1.67874	Unknown	6666666.414137.peg.2093
CUST_1706_PI443154341	0.00398821	0.000654106	up	3.58151	3.58151	1.84057	Unknown	6666666.414137.peg.1676
CUST_783_PI443154341	0.00102263	1.52933e-05	up	5.31367	5.31367	2.40971	Unknown	6666666.414137.peg.770
CUST_1420_PI443154341	0.0122864	0.00474898	up	2.87609	2.87609	1.52411	Unknown	6666666.414137.peg.1399
CUST_2136_PI443154341	0.0433733	0.0259028	up	2.1456	2.1456	1.10138	Unknown	6666666.414137.peg.2102
CUST_2165_PI443154341	0.0169431	0.00743714	down	2.48191	-2.48191	-1.31145	Unknown	6666666.414137.peg.2131
CUST_2772_PI443154341	0.0261338	0.0134899	up	2.92181	2.92181	1.54686	Unknown	6666666.414137.peg.2722
CUST_5392_PI443154341	0.0042616	0.000762675	up	2.30372	2.30372	1.20396	Unknown	6666666.414137.peg.5304
CUST_4002_PI443154341	0.0012969	3.32481e-05	up	5.29705	5.29705	2.40519	Unknown	6666666.414137.peg.3926
CUST_2559_PI443154341	0.0294771	0.0157825	up	2.28252	2.28252	1.19063	Unknown	6666666.414137.peg.2515
CUST_562_PI443154341	0.00239883	0.000169909	up	19.3094	19.3094	4.27123	Unknown	6666666.414137.peg.552
CUST_984_PI443154341	0.0146912	0.00613966	up	2.69677	2.69677	1.43123	Unknown	6666666.414137.peg.969
CUST_4879_PI443154341	0.0080255	0.00243337	down	2.68758	-2.68758	-1.42631	Unknown	6666666.414137.peg.4794
CUST_1529_PI443154341	0.00539738	0.00121372	down	2.97895	-2.97895	-1.5748	Unknown	6666666.414137.peg.1501
CUST_3633_PI443154341	0.000773776	2.1484e-06	up	34.3458	34.3458	5.10206	Unknown	6666666.414137.peg.3561
CUST_4399_PI443154341	0.00934279	0.00316135	up	3.14636	3.14636	1.65368	Unknown	6666666.414137.peg.4319
CUST_2371_PI443154341	0.0122765	0.00472903	up	2.12414	2.12414	1.08688	Unknown	6666666.414137.peg.2335
CUST_3647_PI443154341	0.00590267	0.00141476	up	3.22831	3.22831	1.69078	Unknown	6666666.414137.peg.3575
CUST_701_PI443154341	0.00246867	0.000197169	up	2.64331	2.64331	1.40235	Unknown	6666666.414137.peg.690
CUST_1083_PI443154341	0.00160377	5.87742e-05	up	2.66213	2.66213	1.41258	Unknown	6666666.414137.peg.1066
CUST_4297_PI443154341	0.00257147	0.000228668	up	2.74079	2.74079	1.45459	Unknown	6666666.414137.peg.4217
CUST_1079_PI443154341	0.00626099	0.00159174	up	3.38518	3.38518	1.75923	Unknown	6666666.414137.peg.1062
CUST_5542_PI443154341	0.00212854	0.000130826	up	2.94635	2.94635	1.55893	Unknown	6666666.414137.peg.5454
CUST_5037_PI443154341	0.00241426	0.000172589	up	3.17141	3.17141	1.66512	Unknown	6666666.414137.peg.4952
CUST_571_PI443154341	0.000661713	6.06738e-07	up	71.2029	71.2029	6.15386	Unknown	6666666.414137.peg.561
CUST_1231_PI443154341	0.00241484	0.00017479	up	2.07063	2.07063	1.05007	Unknown	6666666.414137.peg.1212
CUST_5800_PI443154341	0.00405046	0.000667644	up	2.41815	2.41815	1.2739	Unknown	6666666.414137.peg.5711
CUST_1329_PI443154341	0.00248222	0.000199422	up	2.3959	2.3959	1.26057	Unknown	6666666.414137.peg.1309
CUST_1151_PI443154341	0.00245383	0.000193141	up	7.06252	7.06252	2.82018	Unknown	6666666.414137.peg.1132
CUST_1152_PI443154341	0.00293797	0.000336585	up	3.86764	3.86764	1.95146	Unknown	6666666.414137.peg.1133
CUST_2364_PI443154341	0.0031299	0.000389624	down	6.95629	-6.95629	-2.79832	Unknown	6666666.414137.peg.2329
CUST_1897_PI443154341	0.00682123	0.00186869	up	2.98517	2.98517	1.57781	Unknown	6666666.414137.peg.1866
CUST_754_PI443154341	0.00390382	0.000619736	up	2.71668	2.71668	1.44184	Unknown	6666666.414137.peg.741
CUST_5861_PI443154341	0.0235447	0.0117317	up	4.91795	4.91795	2.29806	Unknown	6666666.414137.peg.5772
CUST_4008_PI443154341	0.00341043	0.000473842	up	2.43477	2.43477	1.28379	Unknown	6666666.414137.peg.3932
CUST_1157_PI443154341	0.00324822	0.000432384	up	6.2732	6.2732	2.6492	Unknown	6666666.414137.peg.1138
CUST_573_PI443154341	0.00120547	2.79329e-05	up	14.5888	14.5888	3.86679	Unknown	6666666.414137.peg.563
CUST_2695_PI443154341	0.00102263	1.46609e-05	down	3.83327	-3.83327	-1.93858	Unknown	6666666.414137.peg.2648
CUST_1865_PI443154341	0.00245383	0.000194104	up	2.0187	2.0187	1.01343	Unknown	6666666.414137.peg.1834
CUST_862_PI443154341	0.00350125	0.00049311	up	4.81226	4.81226	2.26672	Unknown	6666666.414137.peg.847
CUST_2339_PI443154341	0.0226176	0.011136	up	2.27298	2.27298	1.18459	Unknown	6666666.414137.peg.2304
CUST_1694_PI443154341	0.00432996	0.000783284	down	2.17484	-2.17484	-1.12091	Unknown	6666666.414137.peg.1664
CUST_4978_PI443154341	0.0259527	0.0133709	up	2.03945	2.03945	1.02818	Unknown	6666666.414137.peg.4893
CUST_1195_PI443154341	0.00537842	0.00120582	down	2.18354	-2.18354	-1.12667	Unknown	6666666.414137.peg.1176
CUST_1707_PI443154341	0.00134257	3.68461e-05	up	7.91123	7.91123	2.9839	Unknown	6666666.414137.peg.1677
CUST_522_PI443154341	0.0030266	0.000360852	up	3.36414	3.36414	1.75024	Unknown	6666666.414137.peg.512
CUST_3040_PI443154341	0.00111546	1.94313e-05	up	4.07423	4.07423	2.02653	Unknown	6666666.414137.peg.2984
CUST_2492_PI443154341	0.00424965	0.000756346	down	2.46409	-2.46409	-1.30106	Unknown	#N/A
CUST_6000_PI443154341	0.0055982	0.00129102	up	4.98848	4.98848	2.3186	Unknown	6666666.414137.peg.5909
CUST_5038_PI443154341	0.00195845	0.000105245	up	2.2376	2.2376	1.16195	Unknown	6666666.414137.peg.4953
CUST_2121_PI443154341	0.00372189	0.000559048	up	2.30794	2.30794	1.20661	Unknown	6666666.414137.peg.2087
CUST_4734_PI443154341	0.0140022	0.00571824	up	2.25605	2.25605	1.1738	Unknown	6666666.414137.peg.4651
CUST_1557_PI443154341	0.00487007	0.00100443	up	3.65588	3.65588	1.87022	Unknown	6666666.414137.peg.1529
CUST_2808_PI443154341	0.00241484	0.000176842	up	4.73889	4.73889	2.24455	Unknown	6666666.414137.peg.2758
CUST_1973_PI443154341	0.0231755	0.0115051	up	2.64986	2.64986	1.40592	Unknown	6666666.414137.peg.1942
CUST_679_PI443154341	0.00620547	0.00156157	up	3.66002	3.66002	1.87185	Unknown	6666666.414137.peg.668
CUST_1431_PI443154341	0.0117561	0.00444363	up	2.60513	2.60513	1.38135	Unknown	6666666.414137.peg.1410
CUST_607_PI443154341	0.00831552	0.002591	up	4.89044	4.89044	2.28996	Unknown	6666666.414137.peg.597
CUST_3218_PI443154341	0.00165181	6.24051e-05	up	5.27522	5.27522	2.39923	Unknown	6666666.414137.peg.3160
CUST_3592_PI443154341	0.00913524	0.00305659	down	2.2808	-2.2808	-1.18954	Unknown	6666666.414137.peg.3520
CUST_382_PI443154341	0.00199843	0.000114324	down	2.17516	-2.17516	-1.12112	Unknown	6666666.414137.peg.375
CUST_927_PI443154341	0.0102035	0.00359748	up	2.26284	2.26284	1.17814	Unknown	#N/A
CUST_5002_PI443154341	0.0135523	0.00547883	up	3.7232	3.7232	1.89654	Unknown	6666666.414137.peg.4917
CUST_1085_PI443154341	0.00231359	0.000153606	up	7.03676	7.03676	2.81491	Unknown	6666666.414137.peg.1068
CUST_1563_PI443154341	0.00258277	0.000243229	down	2.10305	-2.10305	-1.07248	Unknown	6666666.414137.peg.1535
CUST_374_PI443154341	0.00433501	0.000789348	down	2.21282	-2.21282	-1.14589	Unknown	6666666.414137.peg.367
CUST_1870_PI443154341	0.00257147	0.000228107	up	7.98969	7.98969	2.99814	Unknown	#N/A
CUST_1496_PI443154341	0.00255015	0.00021932	down	2.12473	-2.12473	-1.08728	Unknown	6666666.414137.peg.1473
CUST_5819_PI443154341	0.00159625	5.6269e-05	down	3.36555	-3.36555	-1.75084	Unknown	6666666.414137.peg.5730
CUST_535_PI443154341	0.00288809	0.000319663	down	2.35118	-2.35118	-1.23338	Unknown	6666666.414137.peg.525
CUST_5340_PI443154341	0.00565762	0.00131562	up	2.86059	2.86059	1.51631	Unknown	6666666.414137.peg.5252
CUST_2124_PI443154341	0.00322701	0.000421044	up	2.39404	2.39404	1.25945	Unknown	6666666.414137.peg.2090
CUST_1156_PI443154341	0.0017379	7.99691e-05	up	12.9011	12.9011	3.68942	Unknown	6666666.414137.peg.1137
CUST_5820_PI443154341	0.00248222	0.000198799	down	2.00789	-2.00789	-1.00568	Unknown	6666666.414137.peg.5731
CUST_4651_PI443154341	0.0152834	0.00644919	up	2.57186	2.57186	1.36281	Unknown	6666666.414137.peg.4568
CUST_1719_PI443154341	0.00116752	2.16811e-05	down	4.9037	-4.9037	-2.29387	Unknown	6666666.414137.peg.1689
CUST_1727_PI443154341	0.00392126	0.000624889	up	2.57223	2.57223	1.36302	Unknown	6666666.414137.peg.1697
CUST_1412_PI443154341	0.0127978	0.00506653	up	2.53412	2.53412	1.34148	Unknown	6666666.414137.peg.1391
CUST_4604_PI443154341	0.00245383	0.000188275	down	2.57588	-2.57588	-1.36506	Unknown	6666666.414137.peg.4521
CUST_512_PI443154341	0.000883675	4.5078e-06	down	6.48989	-6.48989	-2.69819	Unknown	6666666.414137.peg.502
CUST_4401_PI443154341	0.0134305	0.00540668	up	2.01236	2.01236	1.00889	Unknown	6666666.414137.peg.4321
CUST_4424_PI443154341	0.00385347	0.00060221	up	4.07737	4.07737	2.02764	Unknown	6666666.414137.peg.4344
CUST_4972_PI443154341	0.00240496	0.000171394	down	2.17842	-2.17842	-1.12328	Unknown	6666666.414137.peg.4887
CUST_356_PI443154341	0.0277746	0.0145651	up	2.54004	2.54004	1.34485	Unknown	6666666.414137.peg.349
CUST_4388_PI443154341	0.00167354	6.76e-05	down	3.39999	-3.39999	-1.76553	Unknown	6666666.414137.repeat.39
CUST_1279_PI443154341	0.00440183	0.000811645	up	4.85778	4.85778	2.2803	Unknown	6666666.414137.peg.1259
CUST_5316_PI443154341	0.00665746	0.00177262	up	3.00556	3.00556	1.58763	Unknown	6666666.414137.peg.5228
CUST_4145_PI443154341	0.00373908	0.000566545	up	3.8962	3.8962	1.96207	Unknown	#N/A
CUST_1179_PI443154341	0.00508507	0.00108554	up	3.12583	3.12583	1.64424	Unknown	6666666.414137.peg.1160
CUST_1506_PI443154341	0.00402152	0.000661552	up	2.5365	2.5365	1.34284	Unknown	6666666.414137.peg.1483
CUST_2195_PI443154341	0.0146377	0.0061102	up	5.87927	5.87927	2.55564	Unknown	6666666.414137.peg.2161
CUST_279_PI443154341	0.00099106	1.30358e-05	up	4.55893	4.55893	2.1887	Unknown	6666666.414137.peg.272
CUST_532_PI443154341	0.00821819	0.00254176	up	2.67886	2.67886	1.42162	Unknown	6666666.414137.peg.522
CUST_5873_PI443154341	0.00248222	0.000199787	down	4.44957	-4.44957	-2.15367	Unknown	6666666.414137.peg.5784
CUST_3195_PI443154341	0.00419715	0.000724955	up	2.08081	2.08081	1.05715	Unknown	#N/A
CUST_1430_PI443154341	0.0125496	0.00490714	up	3.16467	3.16467	1.66206	Unknown	#N/A
CUST_4759_PI443154341	0.00117042	2.21207e-05	down	3.69897	-3.69897	-1.88712	Unknown	6666666.414137.peg.4674
CUST_5459_PI443154341	0.00555724	0.00127401	up	3.67142	3.67142	1.87634	Unknown	#N/A
CUST_3464_PI443154341	0.00224716	0.000145872	up	8.322	8.322	3.05693	Unknown	6666666.414137.peg.3396
CUST_2680_PI443154341	0.0436894	0.0261562	up	2.97578	2.97578	1.57327	Unknown	#N/A
CUST_327_PI443154341	0.00701901	0.00195872	down	2.28572	-2.28572	-1.19265	Unknown	6666666.414137.peg.320
CUST_393_PI443154341	0.0303973	0.0164577	up	2.06486	2.06486	1.04605	Unknown	6666666.414137.peg.386
CUST_3457_PI443154341	0.0185442	0.00843859	up	2.1739	2.1739	1.12028	Unknown	6666666.414137.peg.3389
CUST_3919_PI443154341	0.00413439	0.000701181	down	2.02117	-2.02117	-1.01519	Unknown	6666666.414137.peg.3845
CUST_2212_PI443154341	0.00224716	0.000145686	up	2.31943	2.31943	1.21377	Unknown	6666666.414137.peg.2178
CUST_3465_PI443154341	0.00146022	4.33457e-05	up	22.4819	22.4819	4.49069	Unknown	6666666.414137.peg.3397
CUST_5513_PI443154341	0.0066721	0.00178368	up	2.18982	2.18982	1.13081	Unknown	6666666.414137.peg.5425
CUST_3815_PI443154341	0.00159625	5.75012e-05	down	3.38673	-3.38673	-1.75989	Unknown	6666666.414137.peg.3741
CUST_4162_PI443154341	0.00248222	0.000200604	up	25.3196	25.3196	4.66218	Unknown	6666666.414137.peg.4082
CUST_2146_PI443154341	0.00874894	0.00282813	up	2.18477	2.18477	1.12748	Unknown	6666666.414137.peg.2112
CUST_557_PI443154341	0.00117932	2.37297e-05	up	8.59179	8.59179	3.10296	Unknown	6666666.414137.peg.547
CUST_2869_PI443154341	0.0252703	0.0129279	up	2.0801	2.0801	1.05665	Unknown	6666666.414137.peg.2818
CUST_2691_PI443154341	0.00180378	8.83365e-05	up	7.19094	7.19094	2.84618	Unknown	6666666.414137.peg.2644
CUST_5309_PI443154341	0.00193323	0.000102619	down	2.72223	-2.72223	-1.44479	Unknown	6666666.414137.peg.5221
CUST_3471_PI443154341	0.00220198	0.000140747	up	6.80103	6.80103	2.76575	Unknown	6666666.414137.peg.3403
CUST_3114_PI443154341	0.0335079	0.0186565	up	2.32291	2.32291	1.21593	Unknown	6666666.414137.peg.3056
CUST_3651_PI443154341	0.0211844	0.0101413	up	3.09326	3.09326	1.62913	Unknown	6666666.414137.peg.3579
CUST_1404_PI443154341	0.00189135	9.97736e-05	down	2.66385	-2.66385	-1.41351	Unknown	6666666.414137.peg.1383
CUST_3107_PI443154341	0.00310361	0.000383552	down	2.12673	-2.12673	-1.08864	Unknown	6666666.414137.rna.40
CUST_4270_PI443154341	0.00102263	1.41185e-05	up	5.65296	5.65296	2.49901	Unknown	6666666.414137.peg.4190
CUST_3788_PI443154341	0.00424965	0.000756197	down	2.30392	-2.30392	-1.20409	Unknown	6666666.414137.peg.3714
CUST_3628_PI443154341	0.00382624	0.000586143	up	4.00689	4.00689	2.00248	Unknown	6666666.414137.peg.3556
CUST_3716_PI443154341	0.00530005	0.00117237	up	2.13684	2.13684	1.09548	Unknown	6666666.414137.peg.3643
CUST_3084_PI443154341	0.00878261	0.00285231	up	4.29685	4.29685	2.10328	Unknown	6666666.414137.peg.3027
CUST_1622_PI443154341	0.0125496	0.00491654	up	6.58838	6.58838	2.71992	Unknown	6666666.414137.peg.1594
CUST_3579_PI443154341	0.00454566	0.000868792	up	2.4278	2.4278	1.27965	Unknown	6666666.414137.peg.3507
CUST_1256_PI443154341	0.00117042	2.30814e-05	up	5.61198	5.61198	2.48851	Unknown	6666666.414137.peg.1236
CUST_4975_PI443154341	0.0212099	0.0101605	up	2.1262	2.1262	1.08828	Unknown	6666666.414137.peg.4890
CUST_2706_PI443154341	0.00528612	0.00115973	down	3.48772	-3.48772	-1.80228	Unknown	6666666.414137.peg.2659
CUST_3033_PI443154341	0.00293542	0.000330446	down	2.03106	-2.03106	-1.02223	Unknown	6666666.414137.peg.2977
CUST_3951_PI443154341	0.0122864	0.00474401	down	2.02834	-2.02834	-1.0203	Unknown	6666666.414137.peg.3877
CUST_298_PI443154341	0.00353906	0.000505699	up	2.54705	2.54705	1.34882	Unknown	#N/A
CUST_1711_PI443154341	0.00387061	0.000610435	up	32.5816	32.5816	5.02599	Unknown	6666666.414137.peg.1681
CUST_5789_PI443154341	0.00246867	0.000196544	up	3.34012	3.34012	1.7399	Unknown	6666666.414137.peg.5700
CUST_5_PI443154341	0.0152834	0.00644993	up	3.49098	3.49098	1.80363	Unknown	6666666.414137.peg.4
CUST_6001_PI443154341	0.00411855	0.000686989	up	7.12199	7.12199	2.83228	Unknown	6666666.414137.peg.5910
CUST_1526_PI443154341	0.0236502	0.0118037	down	2.34173	-2.34173	-1.22758	Unknown	6666666.414137.peg.1498
CUST_2078_PI443154341	0.00763731	0.00224287	down	2.28209	-2.28209	-1.19036	Unknown	6666666.414137.peg.2045
CUST_3696_PI443154341	0.00322701	0.000420347	up	24.7115	24.7115	4.62711	Unknown	6666666.414137.peg.3624
CUST_5271_PI443154341	0.00236688	0.000159837	down	2.37638	-2.37638	-1.24876	Unknown	6666666.414137.peg.5183
CUST_5159_PI443154341	0.00611602	0.00152272	down	2.61787	-2.61787	-1.38839	Unknown	6666666.414137.peg.5071
CUST_4881_PI443154341	0.00438525	0.000804262	down	2.05323	-2.05323	-1.0379	Unknown	#N/A
CUST_5848_PI443154341	0.00598091	0.00145007	down	2.73485	-2.73485	-1.45146	Unknown	#N/A
CUST_3632_PI443154341	0.00116021	2.04015e-05	up	25.2731	25.2731	4.65953	Unknown	6666666.414137.peg.3560
CUST_2570_PI443154341	0.0124231	0.00481986	up	2.02437	2.02437	1.01748	Unknown	6666666.414137.peg.2525
CUST_5359_PI443154341	0.00627842	0.00159824	up	2.61597	2.61597	1.38735	Unknown	6666666.414137.peg.5271
CUST_5557_PI443154341	0.00152692	4.85984e-05	up	2.85547	2.85547	1.51373	Unknown	6666666.414137.peg.5469
CUST_197_PI443154341	0.00757667	0.00220763	up	3.18018	3.18018	1.66911	Unknown	6666666.414137.peg.193
CUST_338_PI443154341	0.00159333	5.44356e-05	down	3.03372	-3.03372	-1.60109	Unknown	6666666.414137.peg.331
CUST_2068_PI443154341	0.00517341	0.0011163	up	3.29723	3.29723	1.72126	Unknown	6666666.414137.peg.2035
CUST_291_PI443154341	0.00122045	2.88817e-05	up	4.87421	4.87421	2.28517	Unknown	6666666.414137.peg.284
CUST_442_PI443154341	0.00392402	0.000626191	up	3.17649	3.17649	1.66743	Unknown	6666666.414137.peg.432
CUST_4732_PI443154341	0.00245383	0.000187056	up	3.21671	3.21671	1.68559	Unknown	6666666.414137.peg.4649
CUST_1922_PI443154341	0.00664258	0.00176408	up	2.35968	2.35968	1.23859	Unknown	#N/A
CUST_600_PI443154341	0.000773776	2.71274e-06	up	12.8628	12.8628	3.68513	Unknown	6666666.414137.peg.590
CUST_4244_PI443154341	0.0254569	0.0130527	up	2.92652	2.92652	1.54918	Unknown	6666666.414137.peg.4164
CUST_639_PI443154341	0.00173916	8.16591e-05	up	3.18294	3.18294	1.67036	Unknown	6666666.414137.peg.628
CUST_3571_PI443154341	0.0036549	0.000537573	up	3.80576	3.80576	1.92819	Unknown	6666666.414137.peg.3499
CUST_5991_PI443154341	0.00166822	6.56967e-05	up	2.44111	2.44111	1.28754	Unknown	6666666.414137.peg.5900
CUST_824_PI443154341	0.00167865	6.92032e-05	down	2.73418	-2.73418	-1.45111	Unknown	6666666.414137.peg.811
CUST_779_PI443154341	0.000883675	3.72589e-06	up	7.0545	7.0545	2.81854	Unknown	6666666.414137.peg.766
CUST_3439_PI443154341	0.00235524	0.000157919	up	2.64819	2.64819	1.40501	Unknown	6666666.414137.peg.3372
CUST_153_PI443154341	0.00372906	0.000561709	up	2.197	2.197	1.13554	Unknown	6666666.414137.peg.149
CUST_5622_PI443154341	0.0187958	0.00863138	up	2.67863	2.67863	1.42149	Unknown	6666666.414137.peg.5534
CUST_1233_PI443154341	0.00935981	0.00316865	up	3.98	3.98	1.99277	Unknown	6666666.414137.peg.1214
CUST_3353_PI443154341	0.00239052	0.000166378	up	3.91495	3.91495	1.969	Unknown	6666666.414137.peg.3289
CUST_2835_PI443154341	0.00203552	0.000121094	down	2.42412	-2.42412	-1.27746	Unknown	6666666.414137.peg.2784
CUST_1527_PI443154341	0.00641229	0.00166173	down	2.34172	-2.34172	-1.22757	Unknown	6666666.414137.peg.1499
CUST_4236_PI443154341	0.00241484	0.000176275	up	2.76538	2.76538	1.46748	Unknown	6666666.414137.peg.4156
CUST_1291_PI443154341	0.0187758	0.00861425	up	2.55458	2.55458	1.35308	Unknown	6666666.414137.peg.1271
CUST_2498_PI443154341	0.00832756	0.00259679	up	2.06245	2.06245	1.04436	Unknown	6666666.414137.peg.2455
CUST_450_PI443154341	0.0247392	0.0125627	up	4.97055	4.97055	2.3134	Unknown	6666666.414137.peg.440
CUST_3082_PI443154341	0.015897	0.00680294	down	2.09852	-2.09852	-1.06937	Unknown	#N/A
CUST_4263_PI443154341	0.00472861	0.000930957	up	4.20003	4.20003	2.0704	Unknown	6666666.414137.peg.4183
CUST_756_PI443154341	0.0186138	0.00848551	up	2.3438	2.3438	1.22885	Unknown	#N/A
CUST_2832_PI443154341	0.028266	0.0148971	up	2.50536	2.50536	1.32502	Unknown	#N/A
CUST_4271_PI443154341	0.0024274	0.000180709	down	2.01634	-2.01634	-1.01174	Unknown	6666666.414137.peg.4191
CUST_5205_PI443154341	0.00179804	8.74641e-05	up	6.31519	6.31519	2.65883	Unknown	6666666.414137.peg.5117
CUST_1349_PI443154341	0.00173601	7.87101e-05	down	2.88158	-2.88158	-1.52686	Unknown	6666666.414137.peg.1329
CUST_199_PI443154341	0.0114096	0.00423008	up	3.26355	3.26355	1.70644	Unknown	6666666.414137.peg.195
CUST_140_PI443154341	0.0021205	0.000129635	down	2.32394	-2.32394	-1.21657	Unknown	6666666.414137.peg.136
CUST_1142_PI443154341	0.000763472	9.9129e-07	up	86.192	86.192	6.42948	Unknown	6666666.414137.peg.1123
CUST_2542_PI443154341	0.0328435	0.0181795	up	2.45883	2.45883	1.29797	Unknown	6666666.414137.peg.2498
CUST_2829_PI443154341	0.024374	0.0123332	up	2.04758	2.04758	1.03392	Unknown	#N/A
CUST_5310_PI443154341	0.0157479	0.00671582	down	2.32261	-2.32261	-1.21575	Unknown	6666666.414137.peg.5222
CUST_3976_PI443154341	0.00256307	0.000223242	up	3.48711	3.48711	1.80203	Unknown	6666666.414137.peg.3900
CUST_4922_PI443154341	0.00716465	0.00201847	up	4.11844	4.11844	2.0421	Unknown	6666666.414137.peg.4837
CUST_5790_PI443154341	0.00650242	0.001698	up	2.47144	2.47144	1.30535	Unknown	6666666.414137.peg.5701
CUST_3133_PI443154341	0.0023683	0.000162619	down	2.19632	-2.19632	-1.13509	Unknown	6666666.414137.peg.3075
CUST_4121_PI443154341	0.00257147	0.000236651	down	2.54965	-2.54965	-1.3503	Unknown	6666666.414137.peg.4041
CUST_3130_PI443154341	0.00947445	0.00323393	up	2.5225	2.5225	1.33486	Unknown	6666666.414137.peg.3072
CUST_4691_PI443154341	0.00146022	4.3376e-05	up	6.13229	6.13229	2.61643	Unknown	6666666.414137.peg.4608
CUST_4400_PI443154341	0.00811936	0.00247917	up	2.35738	2.35738	1.23718	Unknown	6666666.414137.peg.4320
CUST_2508_PI443154341	0.0258496	0.0133135	up	2.10554	2.10554	1.07419	Unknown	6666666.414137.repeat.21
CUST_954_PI443154341	0.00773007	0.0023006	up	3.17105	3.17105	1.66496	Unknown	6666666.414137.peg.939
CUST_2674_PI443154341	0.00258085	0.000240074	up	2.4345	2.4345	1.28363	Unknown	6666666.414137.peg.2627
CUST_3261_PI443154341	0.00198895	0.000110914	up	2.8063	2.8063	1.48867	Unknown	6666666.414137.peg.3203
CUST_2134_PI443154341	0.0014341	4.14793e-05	down	3.33205	-3.33205	-1.73641	Unknown	6666666.414137.peg.2100
CUST_2332_PI443154341	0.013171	0.00525541	up	2.63017	2.63017	1.39515	Unknown	6666666.414137.peg.2297
CUST_1485_PI443154341	0.0036201	0.000525911	up	3.16163	3.16163	1.66067	Unknown	6666666.414137.peg.1462
CUST_564_PI443154341	0.00106062	1.80323e-05	up	34.588	34.588	5.1122	Unknown	6666666.414137.peg.554
CUST_211_PI443154341	0.0111912	0.00410749	up	5.4147	5.4147	2.43688	Unknown	6666666.414137.repeat.2
CUST_3055_PI443154341	0.00647942	0.00168454	down	2.99154	-2.99154	-1.58089	Unknown	6666666.414137.peg.2999
CUST_3475_PI443154341	0.00153817	5.03033e-05	up	9.05503	9.05503	3.17872	Unknown	6666666.414137.repeat.32
CUST_5375_PI443154341	0.00196822	0.00010674	up	5.77109	5.77109	2.52884	Unknown	#N/A
CUST_988_PI443154341	0.0422781	0.0250959	up	2.8035	2.8035	1.48723	Unknown	6666666.414137.peg.973
CUST_2354_PI443154341	0.00159333	5.42295e-05	up	3.1879	3.1879	1.67261	Unknown	#N/A
CUST_3162_PI443154341	0.00293797	0.000333722	up	2.21215	2.21215	1.14545	Unknown	6666666.414137.peg.3104
CUST_207_PI443154341	0.00245383	0.000189544	down	2.28478	-2.28478	-1.19205	Unknown	6666666.414137.peg.203
CUST_4408_PI443154341	0.0274166	0.0143137	up	6.65597	6.65597	2.73465	Unknown	#N/A
CUST_5940_PI443154341	0.00843456	0.00266413	up	2.88538	2.88538	1.52876	Unknown	#N/A
CUST_196_PI443154341	0.027097	0.0140661	up	2.75671	2.75671	1.46295	Unknown	6666666.414137.peg.192
CUST_5869_PI443154341	0.0238549	0.0119446	up	2.24358	2.24358	1.1658	Unknown	#N/A
CUST_5012_PI443154341	0.00203078	0.000117809	up	13.673	13.673	3.77325	Unknown	6666666.414137.peg.4927
CUST_2351_PI443154341	0.0012077	2.81829e-05	up	3.55673	3.55673	1.83055	Unknown	6666666.414137.peg.2316
CUST_1295_PI443154341	0.00675113	0.00183277	up	2.58267	2.58267	1.36886	Unknown	6666666.414137.peg.1275
CUST_1502_PI443154341	0.00308775	0.000378548	up	2.45325	2.45325	1.29469	Unknown	#N/A
CUST_2547_PI443154341	0.0169706	0.0074576	up	2.10338	2.10338	1.07271	Unknown	#N/A
CUST_3927_PI443154341	0.0205864	0.00978406	up	2.97836	2.97836	1.57452	Unknown	6666666.414137.peg.3853
CUST_1228_PI443154341	0.00250685	0.00020681	up	5.15635	5.15635	2.36635	Unknown	6666666.414137.peg.1209
CUST_5006_PI443154341	0.00760807	0.00222032	up	7.91433	7.91433	2.98447	Unknown	6666666.414137.peg.4921
CUST_547_PI443154341	0.000883675	5.61341e-06	up	50.3342	50.3342	5.65347	Unknown	6666666.414137.peg.537
CUST_3784_PI443154341	0.00258085	0.000240908	down	2.0693	-2.0693	-1.04914	Unknown	6666666.414137.peg.3710
CUST_930_PI443154341	0.00242189	0.000178309	up	2.10504	2.10504	1.07385	Unknown	6666666.414137.peg.915
CUST_1251_PI443154341	0.012234	0.00469907	up	2.73234	2.73234	1.45014	Unknown	6666666.414137.peg.1232
CUST_5208_PI443154341	0.00697607	0.00194178	up	2.34735	2.34735	1.23103	Unknown	6666666.414137.peg.5120
CUST_3973_PI443154341	0.00866565	0.00278412	up	2.43443	2.43443	1.28358	Unknown	6666666.414137.peg.3897
CUST_1202_PI443154341	0.0307439	0.016673	up	2.35598	2.35598	1.23633	Unknown	6666666.414137.peg.1183
CUST_3876_PI443154341	0.0349515	0.019713	up	2.13427	2.13427	1.09374	Unknown	6666666.414137.peg.3802
CUST_2911_PI443154341	0.00571174	0.00133893	up	2.23269	2.23269	1.15878	Unknown	6666666.414137.peg.2860
CUST_1182_PI443154341	0.00195128	0.000104218	up	3.48044	3.48044	1.79927	Unknown	6666666.414137.peg.1163
CUST_5600_PI443154341	0.0298206	0.0160257	up	2.27445	2.27445	1.18552	Unknown	6666666.414137.peg.5512
CUST_2450_PI443154341	0.0021601	0.000134033	up	2.57351	2.57351	1.36374	Unknown	6666666.414137.peg.2408
CUST_5374_PI443154341	0.00167354	6.77875e-05	up	6.2866	6.2866	2.65228	Unknown	6666666.414137.peg.5286
CUST_4476_PI443154341	0.00584755	0.0013915	up	5.1109	5.1109	2.35358	Unknown	6666666.414137.peg.4395
CUST_858_PI443154341	0.00124688	2.9917e-05	up	4.11868	4.11868	2.04218	Unknown	6666666.414137.peg.843
CUST_2160_PI443154341	0.0028232	0.000307606	up	2.69109	2.69109	1.42819	Unknown	6666666.414137.peg.2126
CUST_676_PI443154341	0.003889	0.000615465	up	3.13228	3.13228	1.64721	Unknown	6666666.414137.peg.665
CUST_256_PI443154341	0.0140257	0.00573657	up	6.67437	6.67437	2.73863	Unknown	#N/A
CUST_540_PI443154341	0.00335435	0.000454781	up	2.20882	2.20882	1.14328	Unknown	6666666.414137.peg.530
CUST_726_PI443154341	0.0112855	0.00415996	up	3.37142	3.37142	1.75336	Unknown	#N/A
CUST_5529_PI443154341	0.00242544	0.000180164	up	2.24497	2.24497	1.1667	Unknown	6666666.414137.peg.5441
CUST_4328_PI443154341	0.00325582	0.000433931	up	3.46675	3.46675	1.79358	Unknown	6666666.414137.peg.4248
CUST_4362_PI443154341	0.00441768	0.000816744	up	3.12546	3.12546	1.64407	Unknown	#N/A
CUST_2841_PI443154341	0.00768587	0.00227383	up	4.13992	4.13992	2.0496	Unknown	6666666.414137.peg.2790
CUST_1594_PI443154341	0.0024457	0.000183616	down	2.10569	-2.10569	-1.07429	Unknown	6666666.414137.peg.1566
CUST_5334_PI443154341	0.00198895	0.000111542	up	5.03301	5.03301	2.33142	Unknown	6666666.414137.peg.5246
CUST_5112_PI443154341	0.00432364	0.000780173	up	4.22375	4.22375	2.07852	Unknown	6666666.414137.peg.5026
CUST_784_PI443154341	0.0026945	0.000280742	up	2.062	2.062	1.04404	Unknown	6666666.414137.peg.771
CUST_5289_PI443154341	0.00102263	1.45202e-05	up	4.22527	4.22527	2.07904	Unknown	6666666.414137.peg.5201
CUST_5298_PI443154341	0.00258277	0.00024352	down	3.16309	-3.16309	-1.66134	Unknown	6666666.414137.peg.5210
CUST_2868_PI443154341	0.00199843	0.000114065	down	2.28516	-2.28516	-1.1923	Unknown	6666666.414137.peg.2817
CUST_4929_PI443154341	0.00989829	0.00344204	up	2.78757	2.78757	1.47901	Unknown	6666666.414137.peg.4844
CUST_4655_PI443154341	0.00257147	0.000229112	up	2.37986	2.37986	1.25087	Unknown	6666666.414137.peg.4572
CUST_3487_PI443154341	0.00932962	0.0031481	down	2.11057	-2.11057	-1.07763	Unknown	6666666.414137.peg.3415
CUST_4222_PI443154341	0.00270651	0.000283772	up	3.38025	3.38025	1.75713	Unknown	6666666.414137.peg.4142
CUST_5202_PI443154341	0.00477236	0.000964338	up	7.14133	7.14133	2.83619	Unknown	6666666.414137.peg.5114
CUST_1164_PI443154341	0.00152692	4.86806e-05	up	3.21889	3.21889	1.68656	Unknown	6666666.414137.peg.1145
CUST_3713_PI443154341	0.00618008	0.00155391	up	3.80825	3.80825	1.92913	Unknown	6666666.414137.peg.3640
CUST_1277_PI443154341	0.00205584	0.000123655	up	3.68115	3.68115	1.88016	Unknown	6666666.414137.peg.1257
CUST_5996_PI443154341	0.00461763	0.000891385	up	6.25215	6.25215	2.64435	Unknown	6666666.414137.peg.5905
CUST_3467_PI443154341	0.00199843	0.000113976	up	5.86813	5.86813	2.5529	Unknown	6666666.414137.peg.3399
CUST_3469_PI443154341	0.000917137	1.01523e-05	up	6.30439	6.30439	2.65636	Unknown	#N/A
CUST_1905_PI443154341	0.00439858	0.000808044	down	2.03197	-2.03197	-1.02288	Unknown	6666666.414137.peg.1874
CUST_5780_PI443154341	0.00695943	0.00192957	down	3.16114	-3.16114	-1.66044	Unknown	6666666.414137.peg.5691
CUST_1236_PI443154341	0.00563499	0.00130573	up	4.33475	4.33475	2.11595	Unknown	6666666.414137.peg.1217
CUST_2976_PI443154341	0.0133228	0.00533787	up	3.06928	3.06928	1.6179	Unknown	6666666.414137.peg.2924
CUST_3631_PI443154341	0.000661713	6.5247e-07	up	34.3858	34.3858	5.10374	Unknown	6666666.414137.peg.3559
CUST_4565_PI443154341	0.000883675	6.13356e-06	up	5.4955	5.4955	2.45825	Unknown	6666666.414137.peg.4482
CUST_5990_PI443154341	0.000883675	5.63078e-06	up	7.02711	7.02711	2.81293	Unknown	6666666.414137.peg.5899
CUST_4877_PI443154341	0.00350696	0.000495066	down	2.06586	-2.06586	-1.04674	Unknown	6666666.414137.peg.4792
CUST_4235_PI443154341	0.00308043	0.000376371	up	3.23923	3.23923	1.69565	Unknown	6666666.414137.peg.4155
CUST_661_PI443154341	0.00492386	0.00102685	down	3.56234	-3.56234	-1.83283	Unknown	#N/A
CUST_4437_PI443154341	0.00322701	0.00041599	up	2.03605	2.03605	1.02577	Unknown	6666666.414137.peg.4357
CUST_2400_PI443154341	0.00159333	5.48578e-05	up	3.22379	3.22379	1.68876	Unknown	6666666.414137.peg.2362
CUST_1818_PI443154341	0.00193363	0.000102957	down	2.40051	-2.40051	-1.26334	Unknown	6666666.414137.peg.1787
CUST_274_PI443154341	0.0120154	0.00457315	down	2.04975	-2.04975	-1.03545	Unknown	6666666.414137.peg.267
CUST_1663_PI443154341	0.00665997	0.00177745	up	2.53781	2.53781	1.34358	Unknown	6666666.414137.peg.1633
CUST_3413_PI443154341	0.00454566	0.000861201	up	2.53947	2.53947	1.34453	Unknown	6666666.414137.peg.3348
CUST_3978_PI443154341	0.0102457	0.00362682	up	2.08135	2.08135	1.05752	Unknown	6666666.414137.peg.3902
CUST_281_PI443154341	0.00106062	1.76399e-05	up	42.0011	42.0011	5.39236	Unknown	6666666.414137.peg.274
CUST_5706_PI443154341	0.00371887	0.000556099	down	2.12171	-2.12171	-1.08523	Unknown	6666666.414137.peg.5618
CUST_98_PI443154341	0.00256468	0.000223836	up	4.30238	4.30238	2.10513	Unknown	6666666.414137.peg.96
CUST_1421_PI443154341	0.00424966	0.000758036	up	2.3057	2.3057	1.20521	Unknown	6666666.414137.peg.1400
CUST_491_PI443154341	0.00363268	0.000532967	down	2.0472	-2.0472	-1.03365	Unknown	#N/A
CUST_1644_PI443154341	0.012047	0.00459312	up	2.90703	2.90703	1.53955	Unknown	6666666.414137.peg.1614
CUST_11_PI443154341	0.021094	0.0100931	up	2.89995	2.89995	1.53603	Unknown	6666666.414137.peg.10
CUST_2287_PI443154341	0.00764491	0.00224762	up	2.76722	2.76722	1.46844	Unknown	6666666.414137.peg.2253
CUST_3977_PI443154341	0.00255015	0.000219765	up	4.09417	4.09417	2.03357	Unknown	6666666.414137.peg.3901
CUST_1408_PI443154341	0.011588	0.00434001	up	2.37124	2.37124	1.24564	Unknown	6666666.414137.peg.1387
CUST_2714_PI443154341	0.00246867	0.000196896	down	2.44816	-2.44816	-1.2917	Unknown	6666666.414137.peg.2667
CUST_3979_PI443154341	0.0112164	0.00412712	up	3.16581	3.16581	1.66258	Unknown	6666666.414137.peg.3903
CUST_1845_PI443154341	0.0126681	0.00497552	up	2.1956	2.1956	1.13462	Unknown	6666666.414137.peg.1814
CUST_1651_PI443154341	0.000917137	9.17853e-06	down	4.96434	-4.96434	-2.3116	Unknown	6666666.414137.peg.1621
CUST_6022_PI443154341	0.0015336	4.93411e-05	up	2.70573	2.70573	1.43602	Unknown	6666666.414137.peg.5930
CUST_5229_PI443154341	0.00267383	0.000275234	down	2.11928	-2.11928	-1.08357	Unknown	6666666.414137.peg.5141
CUST_608_PI443154341	0.0132521	0.00529648	up	6.79453	6.79453	2.76437	Unknown	#N/A
CUST_5387_PI443154341	0.00267383	0.000275952	up	2.99248	2.99248	1.58134	Unknown	6666666.414137.peg.5299
CUST_4741_PI443154341	0.00541643	0.00122252	down	7.75804	-7.75804	-2.95569	Unknown	6666666.414137.peg.4658
CUST_1276_PI443154341	0.0012969	3.31982e-05	up	3.56657	3.56657	1.83454	Unknown	6666666.414137.peg.1256
CUST_230_PI443154341	0.0384771	0.0223211	down	2.43163	-2.43163	-1.28192	Unknown	6666666.414137.peg.223
CUST_1248_PI443154341	0.0017637	8.3185e-05	up	3.57691	3.57691	1.83871	Unknown	6666666.414137.peg.1229
CUST_555_PI443154341	0.00124688	3.05316e-05	up	8.20772	8.20772	3.03698	Unknown	#N/A
CUST_4822_PI443154341	0.00685664	0.00188628	up	2.2714	2.2714	1.18358	Unknown	6666666.414137.peg.4737
CUST_1709_PI443154341	0.00665746	0.00177359	up	2.63441	2.63441	1.39748	Unknown	#N/A
CUST_2320_PI443154341	0.0201823	0.00952894	up	3.56337	3.56337	1.83324	Unknown	6666666.414137.peg.2285
CUST_2679_PI443154341	0.00423706	0.000751256	up	3.93451	3.93451	1.97619	Unknown	6666666.414137.peg.2632
CUST_2745_PI443154341	0.0023683	0.000162602	down	2.21208	-2.21208	-1.1454	Unknown	6666666.414137.peg.2697
CUST_787_PI443154341	0.00534968	0.00119221	up	2.16851	2.16851	1.1167	Unknown	#N/A
CUST_1500_PI443154341	0.0307497	0.0166811	up	2.80191	2.80191	1.48641	Unknown	6666666.414137.peg.1477
CUST_1978_PI443154341	0.00144075	4.19084e-05	down	2.76291	-2.76291	-1.46619	Unknown	6666666.414137.peg.1947
CUST_2123_PI443154341	0.00461887	0.000892653	up	2.19321	2.19321	1.13304	Unknown	6666666.414137.peg.2089
CUST_3680_PI443154341	0.00404453	0.000666002	up	2.21449	2.21449	1.14698	Unknown	6666666.414137.peg.3608
CUST_5621_PI443154341	0.00934251	0.00315829	up	6.55671	6.55671	2.71297	Unknown	6666666.414137.peg.5533
CUST_703_PI443154341	0.00225191	0.000147424	up	3.69286	3.69286	1.88474	Unknown	6666666.414137.peg.692
CUST_3714_PI443154341	0.00492412	0.00102933	up	2.71374	2.71374	1.44028	Unknown	6666666.414137.peg.3641
CUST_594_PI443154341	0.00239883	0.000168953	up	10.0387	10.0387	3.3275	Unknown	6666666.414137.peg.584
CUST_4003_PI443154341	0.00911053	0.00302736	down	2.83471	-2.83471	-1.5032	Unknown	6666666.414137.peg.3927
CUST_1257_PI443154341	0.0133085	0.00532778	up	3.62334	3.62334	1.85732	Unknown	6666666.414137.peg.1237
CUST_4261_PI443154341	0.0171904	0.00758243	up	7.32339	7.32339	2.87251	Unknown	6666666.414137.peg.4181
CUST_2477_PI443154341	0.00241484	0.000176846	up	2.04791	2.04791	1.03415	Unknown	6666666.414137.peg.2434
CUST_3585_PI443154341	0.0020072	0.000116111	up	2.77937	2.77937	1.47476	Unknown	#N/A
CUST_5218_PI443154341	0.00305141	0.000369299	up	2.01621	2.01621	1.01165	Unknown	6666666.414137.peg.5130
CUST_2515_PI443154341	0.00293797	0.000332797	down	2.7887	-2.7887	-1.4796	Unknown	6666666.414137.peg.2471
CUST_2758_PI443154341	0.00489884	0.00101439	down	2.50123	-2.50123	-1.32264	Unknown	6666666.414137.peg.2710
CUST_254_PI443154341	0.0254805	0.0130691	up	8.0478	8.0478	3.00859	Unknown	6666666.414137.peg.247
CUST_305_PI443154341	0.0127077	0.00501208	up	3.3315	3.3315	1.73617	Unknown	6666666.414137.peg.298
CUST_4384_PI443154341	0.0187237	0.00856949	up	4.37959	4.37959	2.1308	Unknown	6666666.414137.peg.4304
CUST_2545_PI443154341	0.00271479	0.000285856	up	4.07136	4.07136	2.02551	Unknown	6666666.414137.peg.2501
CUST_5708_PI443154341	0.00383378	0.000589715	up	2.91248	2.91248	1.54225	Unknown	6666666.414137.peg.5620
CUST_3002_PI443154341	0.00318999	0.000406764	up	2.0931	2.0931	1.06564	Unknown	6666666.414137.peg.2950
CUST_5777_PI443154341	0.0132582	0.00530109	up	4.60454	4.60454	2.20306	Unknown	6666666.414137.peg.5688
CUST_538_PI443154341	0.000917137	1.04043e-05	up	15.2417	15.2417	3.92996	Unknown	6666666.414137.peg.528
CUST_3461_PI443154341	0.00185877	9.51496e-05	up	10.6555	10.6555	3.41353	Unknown	6666666.414137.peg.3393
CUST_879_PI443154341	0.00384437	0.000595442	up	35.0096	35.0096	5.12968	Unknown	6666666.414137.peg.864
CUST_727_PI443154341	0.00614471	0.00153149	up	4.59952	4.59952	2.20148	Unknown	6666666.414137.peg.716
CUST_330_PI443154341	0.00288809	0.000320846	up	2.9981	2.9981	1.58405	Unknown	#N/A
CUST_277_PI443154341	0.00120547	2.77607e-05	up	3.98465	3.98465	1.99445	Unknown	#N/A
CUST_4104_PI443154341	0.00938499	0.00318797	up	2.03886	2.03886	1.02776	Unknown	6666666.414137.peg.4024
CUST_5440_PI443154341	0.00314504	0.000395391	up	2.31168	2.31168	1.20894	Unknown	6666666.414137.peg.5352
CUST_695_PI443154341	0.00176423	8.35001e-05	down	2.50171	-2.50171	-1.32292	Unknown	#N/A
CUST_561_PI443154341	0.0010556	1.64802e-05	up	8.17479	8.17479	3.03118	Unknown	6666666.414137.peg.551
CUST_551_PI443154341	0.00258085	0.000239216	up	2.47319	2.47319	1.30637	Unknown	6666666.414137.peg.541
CUST_1225_PI443154341	0.0477957	0.0290859	up	2.31672	2.31672	1.21208	Unknown	#N/A
CUST_4789_PI443154341	0.0127978	0.00506647	up	3.28155	3.28155	1.71438	Unknown	6666666.414137.peg.4704
CUST_3679_PI443154341	0.00166822	6.52576e-05	up	3.25455	3.25455	1.70246	Unknown	6666666.414137.peg.3607
CUST_1252_PI443154341	0.00173601	7.90064e-05	down	2.58085	-2.58085	-1.36784	Unknown	6666666.414137.peg.1233
CUST_4564_PI443154341	0.00241484	0.000174778	up	5.10355	5.10355	2.3515	Unknown	6666666.414137.peg.4481
CUST_342_PI443154341	0.00220198	0.000140906	down	2.10251	-2.10251	-1.07211	Unknown	6666666.414137.peg.335
CUST_876_PI443154341	0.012234	0.0047006	up	3.84035	3.84035	1.94124	Unknown	#N/A
CUST_195_PI443154341	0.030315	0.0163905	up	2.30428	2.30428	1.20432	Unknown	6666666.414137.peg.191
CUST_2942_PI443154341	0.017291	0.00767796	up	26.6689	26.6689	4.73709	Unknown	6666666.414137.peg.2890
CUST_3949_PI443154341	0.00598091	0.00145332	up	2.08472	2.08472	1.05985	Unknown	#N/A
CUST_2129_PI443154341	0.00125479	3.09317e-05	up	3.12242	3.12242	1.64266	Unknown	6666666.414137.peg.2095
CUST_5683_PI443154341	0.00823364	0.00254897	up	2.57677	2.57677	1.36557	Unknown	6666666.414137.peg.5595
CUST_3296_PI443154341	0.00267383	0.000273432	up	2.54361	2.54361	1.34688	Unknown	6666666.414137.peg.3238
CUST_877_PI443154341	0.00564278	0.00130938	up	2.43959	2.43959	1.28664	Unknown	6666666.414137.peg.862
CUST_574_PI443154341	0.00181788	8.93258e-05	up	9.62638	9.62638	3.26699	Unknown	6666666.414137.peg.564
CUST_1270_PI443154341	0.00218596	0.000137356	down	2.59671	-2.59671	-1.37669	Unknown	6666666.414137.peg.1250
CUST_620_PI443154341	0.029927	0.0161119	up	2.13597	2.13597	1.09489	Unknown	6666666.414137.peg.610
CUST_2561_PI443154341	0.0013932	3.93805e-05	down	2.99825	-2.99825	-1.58412	Unknown	6666666.414137.repeat.22
CUST_917_PI443154341	0.00691622	0.00191176	down	2.90323	-2.90323	-1.53766	Unknown	6666666.414137.peg.902
CUST_3908_PI443154341	0.00421271	0.000736578	down	2.27223	-2.27223	-1.18411	Unknown	#N/A
CUST_4688_PI443154341	0.0109483	0.00398184	up	2.35222	2.35222	1.23402	Unknown	6666666.414137.peg.4605
CUST_3028_PI443154341	0.00245383	0.000187289	down	2.02909	-2.02909	-1.02083	Unknown	6666666.414137.peg.2972
CUST_1876_PI443154341	0.0017379	7.95337e-05	down	2.76342	-2.76342	-1.46645	Unknown	6666666.414137.peg.1845
CUST_598_PI443154341	0.00367345	0.000544529	up	4.15534	4.15534	2.05497	Unknown	6666666.414137.peg.588
CUST_4107_PI443154341	0.00486833	0.00100167	up	5.04254	5.04254	2.33415	Unknown	#N/A
CUST_1676_PI443154341	0.0025159	0.00020797	down	2.13855	-2.13855	-1.09663	Unknown	6666666.414137.peg.1646
CUST_1652_PI443154341	0.0102812	0.00364954	down	2.49205	-2.49205	-1.31733	Unknown	6666666.414137.peg.1622
CUST_2802_PI443154341	0.00179804	8.74402e-05	up	5.79838	5.79838	2.53565	Unknown	6666666.414137.peg.2752
CUST_2717_PI443154341	0.00353906	0.000506578	down	2.0152	-2.0152	-1.01092	Unknown	6666666.414137.peg.2669
CUST_2825_PI443154341	0.00117997	2.44333e-05	up	5.94608	5.94608	2.57194	Unknown	6666666.414137.peg.2774
CUST_2126_PI443154341	0.00635963	0.0016325	up	3.436	3.436	1.78073	Unknown	6666666.414137.peg.2092
CUST_1725_PI443154341	0.00615558	0.00154067	up	2.14292	2.14292	1.09958	Unknown	6666666.414137.peg.1695
CUST_457_PI443154341	0.00476762	0.000959791	up	2.03133	2.03133	1.02242	Unknown	6666666.414137.peg.447
CUST_2357_PI443154341	0.00340725	0.000472317	up	9.65585	9.65585	3.2714	Unknown	6666666.414137.peg.2322
CUST_4926_PI443154341	0.00407649	0.000676383	up	2.91879	2.91879	1.54537	Unknown	6666666.414137.peg.4841
CUST_2019_PI443154341	0.0046642	0.000911377	up	2.20505	2.20505	1.14081	Unknown	6666666.414137.peg.1986
CUST_2469_PI443154341	0.00257147	0.000231449	up	2.18519	2.18519	1.12776	Unknown	6666666.414137.peg.2426
CUST_560_PI443154341	0.00275274	0.000293209	up	9.53662	9.53662	3.25348	Unknown	6666666.414137.peg.550
CUST_5047_PI443154341	0.00340085	0.000467792	up	2.10116	2.10116	1.07118	Unknown	6666666.414137.peg.4962
CUST_4962_PI443154341	0.00258085	0.000240888	up	2.01707	2.01707	1.01226	Unknown	6666666.414137.peg.4877
CUST_5716_PI443154341	0.00242507	0.00017934	down	2.36949	-2.36949	-1.24458	Unknown	6666666.414137.peg.5628
CUST_3706_PI443154341	0.00389854	0.000617615	down	3.18714	-3.18714	-1.67226	Unknown	6666666.414137.peg.3633
CUST_5994_PI443154341	0.00173601	7.76576e-05	up	4.82372	4.82372	2.27014	Unknown	6666666.414137.peg.5903
CUST_4711_PI443154341	0.00313777	0.000393401	down	2.14973	-2.14973	-1.10415	Unknown	6666666.414137.peg.4628
CUST_2319_PI443154341	0.00281471	0.000305673	up	4.13832	4.13832	2.04904	Unknown	6666666.414137.peg.2284
CUST_642_PI443154341	0.00131456	3.52133e-05	up	6.70057	6.70057	2.74428	Unknown	6666666.414137.peg.631
CUST_2862_PI443154341	0.00383477	0.000592191	down	2.4056	-2.4056	-1.2664	Unknown	6666666.414137.peg.2811
CUST_2377_PI443154341	0.00957075	0.00327938	down	2.0197	-2.0197	-1.01414	Unknown	6666666.414137.peg.2341
CUST_4696_PI443154341	0.00129878	3.38006e-05	up	5.0437	5.0437	2.33448	Unknown	6666666.414137.peg.4613
CUST_4404_PI443154341	0.00659118	0.00173959	up	2.62486	2.62486	1.39224	Unknown	6666666.414137.peg.4324
CUST_945_PI443154341	0.00166216	6.35683e-05	down	3.17656	-3.17656	-1.66747	Unknown	6666666.414137.peg.930
CUST_4875_PI443154341	0.00340725	0.000472592	down	2.0138	-2.0138	-1.00992	Unknown	6666666.414137.peg.4790
CUST_2750_PI443154341	0.00257147	0.000229074	down	2.27551	-2.27551	-1.18619	Unknown	#N/A
CUST_3516_PI443154341	0.00231359	0.000153368	up	2.10183	2.10183	1.07165	Unknown	6666666.414137.peg.3444
CUST_6003_PI443154341	0.000661713	5.9608e-07	up	23.4506	23.4506	4.55155	Unknown	6666666.414137.peg.5912
CUST_4786_PI443154341	0.00931954	0.00313839	up	2.23615	2.23615	1.16102	Unknown	6666666.414137.peg.4701
CUST_4018_PI443154341	0.0219599	0.0107219	up	3.1746	3.1746	1.66657	Unknown	6666666.414137.peg.3942
CUST_3470_PI443154341	0.00304938	0.000366327	up	4.48492	4.48492	2.16508	Unknown	6666666.414137.peg.3402
CUST_187_PI443154341	0.00180378	8.82729e-05	up	4.4357	4.4357	2.14916	Unknown	6666666.414137.peg.183
CUST_744_PI443154341	0.00301562	0.000354342	down	3.68379	-3.68379	-1.88119	Unknown	#N/A
CUST_2412_PI443154341	0.00506944	0.00107887	down	2.20492	-2.20492	-1.14073	Unknown	#N/A
CUST_5184_PI443154341	0.00173916	8.165e-05	up	2.558	2.558	1.35502	Unknown	6666666.414137.peg.5096
CUST_2581_PI443154341	0.00210072	0.000126699	up	3.85952	3.85952	1.94842	Unknown	6666666.414137.peg.2536
CUST_2148_PI443154341	0.00099106	1.31924e-05	up	4.05947	4.05947	2.02129	Unknown	6666666.414137.peg.2114
CUST_572_PI443154341	0.000963629	1.21938e-05	up	43.2505	43.2505	5.43464	Unknown	6666666.414137.peg.562
CUST_5258_PI443154341	0.0161806	0.00695884	up	2.78093	2.78093	1.47557	Unknown	6666666.414137.peg.5170
CUST_1586_PI443154341	0.00715857	0.00201522	up	3.89785	3.89785	1.96268	Unknown	#N/A
CUST_4423_PI443154341	0.00444862	0.000826119	up	2.37819	2.37819	1.24987	Unknown	6666666.414137.peg.4343
CUST_2353_PI443154341	0.00173916	8.14143e-05	up	3.22967	3.22967	1.69139	Unknown	6666666.414137.peg.2318
CUST_1943_PI443154341	0.00875089	0.00283412	up	2.69437	2.69437	1.42995	Unknown	6666666.414137.peg.1912
CUST_546_PI443154341	0.000886816	6.42077e-06	up	20.2145	20.2145	4.33732	Unknown	6666666.414137.peg.536
CUST_5849_PI443154341	0.000917137	9.90012e-06	down	4.35781	-4.35781	-2.1236	Unknown	6666666.414137.peg.5760
CUST_280_PI443154341	0.00118797	2.60164e-05	up	30.4952	30.4952	4.93051	Unknown	6666666.414137.peg.273
CUST_2718_PI443154341	0.00183704	9.32858e-05	up	10.1877	10.1877	3.34876	Unknown	6666666.414137.peg.2670
CUST_419_PI443154341	0.0104067	0.00371371	down	4.72961	-4.72961	-2.24172	Unknown	#N/A
CUST_2143_PI443154341	0.00718406	0.00203302	up	3.83032	3.83032	1.93747	Unknown	6666666.414137.peg.2109
CUST_1687_PI443154341	0.00473959	0.000939351	up	4.18253	4.18253	2.06438	Unknown	6666666.414137.peg.1657
CUST_5734_PI443154341	0.000883675	6.24454e-06	down	5.65389	-5.65389	-2.49924	Unknown	6666666.414137.peg.5646
CUST_5391_PI443154341	0.0217744	0.010592	up	2.25777	2.25777	1.1749	Unknown	#N/A
CUST_2892_PI443154341	0.00263767	0.000266139	down	2.14024	-2.14024	-1.09777	Unknown	6666666.414137.peg.2841
CUST_1585_PI443154341	0.00721225	0.00205131	up	2.44301	2.44301	1.28866	Unknown	6666666.414137.peg.1557
CUST_2234_PI443154341	0.00530549	0.00117532	up	3.91992	3.91992	1.97083	Unknown	#N/A
CUST_2982_PI443154341	0.00218596	0.000138323	up	2.7712	2.7712	1.47051	Unknown	#N/A
CUST_5965_PI443154341	0.00994591	0.0034684	up	4.41626	4.41626	2.14283	Unknown	6666666.414137.peg.5874
CUST_1196_PI443154341	0.00717003	0.00202434	up	3.2088	3.2088	1.68203	Unknown	#N/A
CUST_3299_PI443154341	0.00748993	0.00216285	up	2.9561	2.9561	1.5637	Unknown	6666666.414137.peg.3241
CUST_2322_PI443154341	0.0064165	0.00166397	up	2.43094	2.43094	1.28151	Unknown	6666666.414137.peg.2287
CUST_3774_PI443154341	0.0102812	0.00364523	up	3.40617	3.40617	1.76815	Unknown	6666666.414137.peg.3700
CUST_2356_PI443154341	0.00249375	0.000205159	up	2.8533	2.8533	1.51263	Unknown	6666666.414137.peg.2321
CUST_257_PI443154341	0.0120959	0.00462713	up	4.01661	4.01661	2.00598	Unknown	6666666.414137.peg.250
CUST_3454_PI443154341	0.00415507	0.000708786	down	2.45216	-2.45216	-1.29405	Unknown	6666666.414137.repeat.31
CUST_2511_PI443154341	0.00297108	0.00034569	down	2.06738	-2.06738	-1.0478	Unknown	6666666.414137.peg.2467
CUST_2169_PI443154341	0.00259602	0.000253147	up	5.51539	5.51539	2.46346	Unknown	#N/A
CUST_4908_PI443154341	0.00153817	5.00977e-05	up	2.79635	2.79635	1.48355	Unknown	6666666.414137.peg.4823
CUST_4138_PI443154341	0.00261571	0.000259207	up	2.04627	2.04627	1.033	Unknown	#N/A
CUST_1060_PI443154341	0.00236929	0.000163144	down	2.13817	-2.13817	-1.09638	Unknown	6666666.414137.peg.1044
CUST_3243_PI443154341	0.00245383	0.000188881	up	2.24887	2.24887	1.1692	Unknown	6666666.414137.peg.3185
CUST_4405_PI443154341	0.00440183	0.000811208	up	2.72309	2.72309	1.44525	Unknown	6666666.414137.peg.4325
CUST_683_PI443154341	0.0165874	0.0072183	up	3.05869	3.05869	1.61291	Unknown	#N/A
CUST_2097_PI443154341	0.0076349	0.00223888	up	2.15668	2.15668	1.10881	Unknown	6666666.414137.peg.2064
CUST_558_PI443154341	0.000917137	8.64355e-06	up	20.7342	20.7342	4.37394	Unknown	6666666.414137.peg.548
CUST_253_PI443154341	0.0251647	0.0128615	up	2.58639	2.58639	1.37094	Unknown	6666666.414137.peg.246
CUST_554_PI443154341	0.00146022	4.46703e-05	up	7.35836	7.35836	2.87938	Unknown	6666666.414137.peg.544
CUST_3323_PI443154341	0.00173916	8.14993e-05	up	55.0463	55.0463	5.78257	Unknown	6666666.414137.peg.3260
CUST_5379_PI443154341	0.003678	0.000547501	up	4.18247	4.18247	2.06435	Unknown	6666666.414137.peg.5291
CUST_581_PI443154341	0.000883675	5.57575e-06	up	22.5725	22.5725	4.4965	Unknown	6666666.414137.peg.571
CUST_3407_PI443154341	0.00604774	0.00148883	up	3.29564	3.29564	1.72056	Unknown	6666666.414137.peg.3342
CUST_6007_PI443154341	0.000886816	6.84969e-06	up	6.24441	6.24441	2.64256	Unknown	6666666.414137.peg.5916
CUST_410_PI443154341	0.00185877	9.5252e-05	down	2.28158	-2.28158	-1.19004	Unknown	6666666.414137.peg.403
CUST_4057_PI443154341	0.00466093	0.000905993	down	2.25002	-2.25002	-1.16994	Unknown	6666666.414137.peg.3981
CUST_2824_PI443154341	0.00310773	0.000385078	up	6.1563	6.1563	2.62206	Unknown	6666666.414137.peg.2773
CUST_2186_PI443154341	0.00129878	3.37943e-05	up	7.78693	7.78693	2.96105	Unknown	6666666.414137.peg.2152
CUST_2488_PI443154341	0.00624169	0.00158376	up	13.8367	13.8367	3.79043	Unknown	6666666.414137.peg.2445
CUST_4823_PI443154341	0.00258277	0.000244058	up	10.5892	10.5892	3.40452	Unknown	6666666.414137.peg.4738
CUST_2805_PI443154341	0.000917137	9.00728e-06	up	5.83815	5.83815	2.54551	Unknown	6666666.414137.peg.2755
CUST_1602_PI443154341	0.00259602	0.000249762	down	2.45818	-2.45818	-1.29759	Unknown	6666666.414137.peg.1574
CUST_5267_PI443154341	0.00703908	0.00197117	up	2.10659	2.10659	1.07491	Unknown	#N/A
CUST_1403_PI443154341	0.00350696	0.000494926	up	2.84125	2.84125	1.50653	Unknown	#N/A
CUST_577_PI443154341	0.000883675	5.73415e-06	up	14.6844	14.6844	3.87621	Unknown	6666666.414137.peg.567
CUST_3529_PI443154341	0.00416862	0.000712468	down	2.05579	-2.05579	-1.0397	Unknown	6666666.414137.peg.3457
CUST_5476_PI443154341	0.0106612	0.00384467	up	2.55852	2.55852	1.35531	Unknown	6666666.414137.peg.5388
CUST_1325_PI443154341	0.00440552	0.000813772	up	2.44505	2.44505	1.28986	Unknown	#N/A
CUST_750_PI443154341	0.00293797	0.000333544	down	2.11369	-2.11369	-1.07976	Unknown	6666666.414137.peg.737
CUST_2283_PI443154341	0.00625071	0.0015881	up	7.96001	7.96001	2.99277	Unknown	6666666.414137.peg.2249
CUST_2406_PI443154341	0.00413439	0.000700072	up	3.02468	3.02468	1.59678	Unknown	6666666.414137.peg.2368
CUST_5995_PI443154341	0.00327403	0.000436896	up	2.17927	2.17927	1.12385	Unknown	6666666.414137.peg.5904
CUST_1364_PI443154341	0.00597214	0.0014447	down	2.89983	-2.89983	-1.53597	Unknown	6666666.414137.peg.1344
CUST_2877_PI443154341	0.00616361	0.00154673	up	4.39629	4.39629	2.13629	Unknown	6666666.414137.peg.2826
CUST_3387_PI443154341	0.00258773	0.000247408	down	2.46392	-2.46392	-1.30096	Unknown	6666666.414137.peg.3322
CUST_3359_PI443154341	0.00869561	0.00280518	up	2.3458	2.3458	1.23008	Unknown	6666666.414137.peg.3295
CUST_2921_PI443154341	0.00473497	0.000934127	up	2.09848	2.09848	1.06935	Unknown	6666666.414137.peg.2869
CUST_1185_PI443154341	0.00244487	0.000182411	up	2.55843	2.55843	1.35526	Unknown	#N/A
CUST_667_PI443154341	0.00246867	0.000196143	up	2.26488	2.26488	1.17943	Unknown	6666666.414137.peg.656
CUST_5506_PI443154341	0.00476762	0.000950853	up	2.27043	2.27043	1.18297	Unknown	6666666.414137.peg.5418
CUST_4439_PI443154341	0.00638894	0.00164449	up	2.12852	2.12852	1.08985	Unknown	6666666.414137.peg.4359
CUST_636_PI443154341	0.00146022	4.37789e-05	up	2.72666	2.72666	1.44714	Unknown	6666666.414137.peg.625
CUST_1794_PI443154341	0.00650868	0.00170813	down	2.21687	-2.21687	-1.14853	Unknown	6666666.414137.peg.1763
CUST_5797_PI443154341	0.0017379	7.97387e-05	up	3.46209	3.46209	1.79164	Unknown	6666666.414137.peg.5708
CUST_2365_PI443154341	0.00309682	0.000380677	down	3.28929	-3.28929	-1.71778	Unknown	6666666.414137.peg.2330
CUST_1808_PI443154341	0.00811703	0.00247486	up	2.09437	2.09437	1.06652	Unknown	6666666.414137.peg.1777
CUST_278_PI443154341	0.000883675	5.06009e-06	up	6.77109	6.77109	2.75939	Unknown	6666666.414137.peg.271
CUST_1254_PI443154341	0.00617069	0.00155053	up	2.03195	2.03195	1.02287	Unknown	6666666.414137.peg.1234
CUST_5690_PI443154341	0.00660429	0.00174977	up	2.75834	2.75834	1.4638	Unknown	6666666.414137.peg.5602
CUST_71_PI443154341	0.0034025	0.000470245	down	2.29934	-2.29934	-1.20122	Unknown	6666666.414137.peg.70
CUST_2687_PI443154341	0.00267383	0.000275052	up	2.06933	2.06933	1.04916	Unknown	#N/A
CUST_4646_PI443154341	0.0118727	0.0045091	up	2.23202	2.23202	1.15835	Unknown	6666666.414137.peg.4563
CUST_361_PI443154341	0.0190702	0.00882526	up	2.61065	2.61065	1.38441	Unknown	6666666.414137.peg.354
CUST_2018_PI443154341	0.0109549	0.00398769	up	2.1071	2.1071	1.07526	Unknown	6666666.414137.peg.1985
CUST_1139_PI443154341	0.00173916	8.17418e-05	up	9.21347	9.21347	3.20374	Unknown	6666666.414137.repeat.9
CUST_1297_PI443154341	0.00853293	0.00271904	up	2.74086	2.74086	1.45463	Unknown	6666666.414137.peg.1277
CUST_1439_PI443154341	0.00412109	0.000688162	down	2.84652	-2.84652	-1.5092	Unknown	#N/A
CUST_4514_PI443154341	0.0124558	0.00485132	down	2.052	-2.052	-1.03703	Unknown	6666666.414137.peg.4431
CUST_5616_PI443154341	0.00419836	0.000730118	up	2.04401	2.04401	1.0314	Unknown	6666666.414137.peg.5528
CUST_2029_PI443154341	0.0166142	0.00723816	up	5.32514	5.32514	2.41282	Unknown	6666666.414137.peg.1996
CUST_3671_PI443154341	0.0117444	0.0044314	up	2.68384	2.68384	1.4243	Unknown	6666666.414137.peg.3599
CUST_2061_PI443154341	0.000963629	1.20679e-05	up	7.153	7.153	2.83855	Unknown	6666666.414137.peg.2028
CUST_2950_PI443154341	0.00274304	0.000290307	up	2.28394	2.28394	1.19152	Unknown	6666666.414137.peg.2898
CUST_3570_PI443154341	0.0030266	0.000359473	down	3.59725	-3.59725	-1.84689	Unknown	6666666.414137.peg.3498
CUST_5011_PI443154341	0.00269237	0.000280077	up	8.47555	8.47555	3.08331	Unknown	6666666.414137.peg.4926
CUST_4396_PI443154341	0.0119321	0.00453361	up	4.19494	4.19494	2.06865	Unknown	6666666.414137.peg.4316
CUST_1108_PI443154341	0.00167865	6.94957e-05	down	2.38814	-2.38814	-1.25589	Unknown	6666666.414137.peg.1091
CUST_589_PI443154341	0.0018802	9.79498e-05	up	24.0126	24.0126	4.58572	Unknown	6666666.414137.peg.579
CUST_2249_PI443154341	0.00173601	7.65439e-05	down	2.3847	-2.3847	-1.25381	Unknown	6666666.414137.peg.2215
CUST_5695_PI443154341	0.00166822	6.6445e-05	up	3.4862	3.4862	1.80166	Unknown	6666666.414137.peg.5607
CUST_118_PI443154341	0.00433501	0.000788324	up	2.5501	2.5501	1.35056	Unknown	6666666.414137.peg.115
CUST_1833_PI443154341	0.00204792	0.000122283	down	2.44598	-2.44598	-1.29041	Unknown	#N/A
CUST_3334_PI443154341	0.00198475	0.000110246	up	3.08329	3.08329	1.62447	Unknown	6666666.414137.peg.3271
CUST_613_PI443154341	0.00755836	0.00219973	up	2.83428	2.83428	1.50298	Unknown	6666666.414137.peg.603
CUST_5973_PI443154341	0.00517912	0.00111838	up	5.29654	5.29654	2.40505	Unknown	6666666.414137.peg.5882
CUST_290_PI443154341	0.00173601	7.90262e-05	up	2.73931	2.73931	1.45382	Unknown	6666666.414137.peg.283
CUST_69_PI443154341	0.00934251	0.00315943	down	2.39961	-2.39961	-1.2628	Unknown	#N/A
CUST_421_PI443154341	0.0039416	0.000639336	down	3.95347	-3.95347	-1.98312	Unknown	6666666.414137.peg.414
CUST_5799_PI443154341	0.000773776	2.25796e-06	up	12.1761	12.1761	3.60598	Unknown	6666666.414137.peg.5710
CUST_3445_PI443154341	0.0140257	0.00573068	up	3.81704	3.81704	1.93245	Unknown	6666666.414137.peg.3378
CUST_392_PI443154341	0.00615755	0.00154322	up	4.03022	4.03022	2.01086	Unknown	6666666.414137.peg.385
CUST_1723_PI443154341	0.00412109	0.000691755	up	3.89235	3.89235	1.96064	Unknown	6666666.414137.peg.1693
CUST_1703_PI443154341	0.0198506	0.00930384	up	2.45612	2.45612	1.29638	Unknown	6666666.414137.peg.1673
CUST_1528_PI443154341	0.0032361	0.00042758	down	2.68062	-2.68062	-1.42257	Unknown	6666666.414137.peg.1500
CUST_295_PI443154341	0.0012969	3.32484e-05	up	3.98723	3.98723	1.99539	Unknown	6666666.414137.peg.288
CUST_3146_PI443154341	0.00768532	0.00227201	down	2.89294	-2.89294	-1.53254	Unknown	#N/A
CUST_5700_PI443154341	0.00259661	0.000253901	up	7.30196	7.30196	2.86828	Unknown	#N/A
CUST_4022_PI443154341	0.00151255	4.77253e-05	up	3.01715	3.01715	1.59319	Unknown	6666666.414137.peg.3946
CUST_3117_PI443154341	0.0169891	0.00747407	up	2.13813	2.13813	1.09635	Unknown	#N/A
CUST_2000_PI443154341	0.0116614	0.004379	up	2.61768	2.61768	1.38829	Unknown	#N/A
CUST_5815_PI443154341	0.00195845	0.000105105	down	2.63509	-2.63509	-1.39785	Unknown	#N/A
CUST_2553_PI443154341	0.00419715	0.000724593	up	3.09262	3.09262	1.62883	Unknown	6666666.414137.peg.2509
CUST_1974_PI443154341	0.00155167	5.12696e-05	down	2.73346	-2.73346	-1.45073	Unknown	6666666.414137.peg.1943
CUST_506_PI443154341	0.000917137	1.08318e-05	up	40.9563	40.9563	5.35601	Unknown	6666666.414137.peg.496
CUST_544_PI443154341	0.000917137	1.11479e-05	up	19.0151	19.0151	4.24908	Unknown	#N/A
CUST_5357_PI443154341	0.0021601	0.000134337	up	4.73766	4.73766	2.24418	Unknown	6666666.414137.peg.5269
CUST_556_PI443154341	0.00103294	1.58363e-05	up	10.3467	10.3467	3.3711	Unknown	6666666.414137.peg.546
CUST_3165_PI443154341	0.003889	0.000614415	up	2.16633	2.16633	1.11526	Unknown	#N/A
CUST_4709_PI443154341	0.00183704	9.19112e-05	down	3.23485	-3.23485	-1.6937	Unknown	6666666.414137.peg.4626
CUST_1170_PI443154341	0.0112874	0.00416436	up	3.23855	3.23855	1.69535	Unknown	#N/A
CUST_4293_PI443154341	0.000819493	3.09751e-06	up	22.7802	22.7802	4.50971	Unknown	#N/A
CUST_939_PI443154341	0.0148362	0.00621	up	2.42913	2.42913	1.28044	Unknown	6666666.414137.peg.924
CUST_611_PI443154341	0.00740342	0.00212671	up	3.15806	3.15806	1.65904	Unknown	6666666.414137.peg.601
CUST_174_PI443154341	0.0125515	0.00491953	up	2.16697	2.16697	1.11568	Unknown	6666666.414137.peg.170
CUST_4662_PI443154341	0.00203552	0.000120971	down	2.11666	-2.11666	-1.08179	Unknown	6666666.414137.peg.4579
CUST_1052_PI443154341	0.00409544	0.000681787	down	4.41574	-4.41574	-2.14265	Unknown	6666666.414137.peg.1036
CUST_3970_PI443154341	0.00600374	0.00146418	up	5.25984	5.25984	2.39502	Unknown	6666666.414137.peg.3895
CUST_1432_PI443154341	0.0021601	0.00013454	up	3.91183	3.91183	1.96784	Unknown	6666666.414137.peg.1411
CUST_1813_PI443154341	0.0307439	0.0166689	up	2.59689	2.59689	1.37678	Unknown	6666666.414137.peg.1782
CUST_2299_PI443154341	0.0186362	0.00850661	up	4.19369	4.19369	2.06822	Unknown	6666666.414137.repeat.17
CUST_3712_PI443154341	0.00574782	0.00135171	up	4.84506	4.84506	2.27651	Unknown	6666666.414137.peg.3639
CUST_552_PI443154341	0.0011963	2.68901e-05	up	14.8522	14.8522	3.89261	Unknown	6666666.414137.peg.542
CUST_5691_PI443154341	0.0184639	0.00838065	up	3.47251	3.47251	1.79598	Unknown	6666666.414137.peg.5603
CUST_2252_PI443154341	0.0221097	0.0108278	up	5.74416	5.74416	2.52209	Unknown	6666666.414137.peg.2218
CUST_3622_PI443154341	0.00293797	0.000334706	up	2.83465	2.83465	1.50317	Unknown	6666666.414137.peg.3550
CUST_467_PI443154341	0.00129878	3.41503e-05	up	3.07314	3.07314	1.61971	Unknown	6666666.414137.peg.457
CUST_1846_PI443154341	0.00260444	0.000256806	up	5.13606	5.13606	2.36066	Unknown	6666666.414137.peg.1815
CUST_896_PI443154341	0.00225191	0.000146871	up	2.72762	2.72762	1.44764	Unknown	6666666.414137.peg.881
CUST_946_PI443154341	0.000886816	6.57257e-06	down	5.29674	-5.29674	-2.4051	Unknown	6666666.414137.peg.931
CUST_4381_PI443154341	0.0244245	0.0123668	up	2.73319	2.73319	1.45059	Unknown	6666666.414137.peg.4301
CUST_5234_PI443154341	0.00975745	0.00337382	up	3.2723	3.2723	1.7103	Unknown	6666666.414137.peg.5146
CUST_2602_PI443154341	0.00322701	0.00042255	down	2.03659	-2.03659	-1.02615	Unknown	6666666.414137.peg.2557
CUST_5920_PI443154341	0.0121835	0.00467316	up	2.23271	2.23271	1.1588	Unknown	6666666.414137.peg.5830
CUST_5177_PI443154341	0.011755	0.00444119	up	2.76437	2.76437	1.46695	Unknown	6666666.414137.peg.5089
CUST_3566_PI443154341	0.00423706	0.00075132	up	3.13382	3.13382	1.64792	Unknown	6666666.414137.peg.3494
CUST_4288_PI443154341	0.0102327	0.00361959	up	2.07373	2.07373	1.05223	Unknown	6666666.414137.peg.4208
CUST_3477_PI443154341	0.00218596	0.000138304	up	10.59	10.59	3.40464	Unknown	6666666.414137.peg.3407
CUST_5339_PI443154341	0.0169298	0.00742576	up	2.2825	2.2825	1.19062	Unknown	6666666.414137.peg.5251
CUST_2978_PI443154341	0.00608679	0.00151039	up	4.39331	4.39331	2.13531	Unknown	6666666.414137.peg.2926
CUST_2975_PI443154341	0.00792163	0.00237454	up	5.25519	5.25519	2.39374	Unknown	#N/A
CUST_3016_PI443154341	0.00419715	0.000719544	up	3.44303	3.44303	1.78368	Unknown	#N/A
CUST_576_PI443154341	0.000917137	1.07658e-05	up	6.45137	6.45137	2.68961	Unknown	6666666.414137.peg.566
CUST_2586_PI443154341	0.0017053	7.28692e-05	up	3.78756	3.78756	1.92127	Unknown	6666666.414137.peg.2541
CUST_1455_PI443154341	0.000661713	5.35986e-07	up	31.3275	31.3275	4.96936	Unknown	6666666.414137.peg.1432
CUST_660_PI443154341	0.00440183	0.000809837	down	2.63462	-2.63462	-1.39759	Unknown	#N/A
CUST_1717_PI443154341	0.00173601	7.79979e-05	down	2.61957	-2.61957	-1.38933	Unknown	6666666.414137.peg.1687
CUST_2363_PI443154341	0.000883675	5.84059e-06	down	5.74378	-5.74378	-2.522	Unknown	6666666.414137.peg.2328
CUST_570_PI443154341	0.000773776	1.95228e-06	up	11.9253	11.9253	3.57595	Unknown	6666666.414137.peg.560
CUST_1087_PI443154341	0.00473497	0.000936257	up	2.08176	2.08176	1.05781	Unknown	6666666.414137.peg.1070
CUST_569_PI443154341	0.000917137	8.41147e-06	up	30.3868	30.3868	4.92537	Unknown	6666666.414137.peg.559
CUST_5262_PI443154341	0.00433501	0.000789304	up	2.65269	2.65269	1.40746	Unknown	6666666.414137.peg.5174
CUST_5862_PI443154341	0.00227845	0.000150149	down	3.27811	-3.27811	-1.71287	Unknown	6666666.414137.peg.5773
CUST_4560_PI443154341	0.00118797	2.62944e-05	up	7.26726	7.26726	2.86141	Unknown	6666666.414137.peg.4477
CUST_745_PI443154341	0.00258277	0.000242607	down	2.01066	-2.01066	-1.00767	Unknown	6666666.414137.peg.734
CUST_2306_PI443154341	0.0106738	0.00385556	up	3.67328	3.67328	1.87707	Unknown	6666666.414137.peg.2271
CUST_4524_PI443154341	0.0168137	0.00734993	down	4.16997	-4.16997	-2.06004	Unknown	6666666.414137.peg.4441
CUST_1146_PI443154341	0.00239052	0.00016657	up	9.24694	9.24694	3.20898	Unknown	6666666.414137.peg.1127
CUST_3953_PI443154341	0.00106062	1.81216e-05	up	3.56093	3.56093	1.83225	Unknown	6666666.414137.peg.3879
CUST_433_PI443154341	0.00480252	0.000979896	down	2.1095	-2.1095	-1.0769	Unknown	6666666.414137.repeat.4
CUST_5987_PI443154341	0.00695943	0.00193138	down	2.17473	-2.17473	-1.12083	Unknown	6666666.414137.peg.5896
CUST_875_PI443154341	0.0066835	0.00179299	up	4.80265	4.80265	2.26383	Unknown	6666666.414137.peg.860
CUST_1858_PI443154341	0.00802555	0.00243588	up	2.83845	2.83845	1.5051	Unknown	#N/A
CUST_2343_PI443154341	0.00376004	0.00057034	down	2.80399	-2.80399	-1.48748	Unknown	6666666.414137.peg.2308
CUST_4286_PI443154341	0.0011963	2.70523e-05	down	3.36184	-3.36184	-1.74925	Unknown	6666666.414137.peg.4206
CUST_3555_PI443154341	0.00903067	0.00298598	up	2.70462	2.70462	1.43543	Unknown	6666666.414137.peg.3483
CUST_1744_PI443154341	0.00614531	0.00153608	down	2.35785	-2.35785	-1.23747	Unknown	6666666.414137.peg.1714
CUST_2106_PI443154341	0.00328163	0.000440932	up	3.06338	3.06338	1.61512	Unknown	#N/A
CUST_4052_PI443154341	0.00275283	0.000294057	up	6.08153	6.08153	2.60443	Unknown	6666666.414137.peg.3976
CUST_2807_PI443154341	0.00106879	1.84425e-05	up	5.56523	5.56523	2.47644	Unknown	6666666.414137.peg.2757
CUST_4171_PI443154341	0.00255015	0.000217071	up	2.12119	2.12119	1.08487	Unknown	#N/A
CUST_4558_PI443154341	0.000917137	9.36103e-06	up	9.32335	9.32335	3.22085	Unknown	6666666.414137.peg.4475
CUST_5192_PI443154341	0.0052925	0.00116906	up	2.17868	2.17868	1.12346	Unknown	6666666.414137.peg.5104
CUST_5532_PI443154341	0.00218596	0.000139025	up	3.05614	3.05614	1.61171	Unknown	6666666.414137.peg.5444
CUST_4160_PI443154341	0.00129878	3.40857e-05	up	6.68044	6.68044	2.73994	Unknown	6666666.414137.peg.4080
CUST_537_PI443154341	0.000917137	8.23758e-06	up	12.1681	12.1681	3.60503	Unknown	6666666.414137.peg.527
CUST_3432_PI443154341	0.00304144	0.000363873	up	2.07622	2.07622	1.05396	Unknown	6666666.414137.peg.3365
CUST_2870_PI443154341	0.0168872	0.00740428	up	2.60723	2.60723	1.38252	Unknown	6666666.414137.peg.2819
CUST_5620_PI443154341	0.00845986	0.00268247	up	5.40726	5.40726	2.4349	Unknown	6666666.414137.peg.5532
CUST_3711_PI443154341	0.0109847	0.00400217	up	2.65213	2.65213	1.40715	Unknown	#N/A
CUST_1565_PI443154341	0.00360733	0.000521685	down	2.15934	-2.15934	-1.11059	Unknown	6666666.414137.peg.1537
CUST_3846_PI443154341	0.000773776	2.61657e-06	up	23.0822	23.0822	4.52871	Unknown	#N/A
CUST_865_PI443154341	0.0100986	0.00354322	up	2.91181	2.91181	1.54192	Unknown	6666666.414137.peg.850
CUST_5314_PI443154341	0.0239033	0.0119789	up	2.64422	2.64422	1.40284	Unknown	6666666.414137.peg.5226
CUST_2020_PI443154341	0.00123836	2.95091e-05	down	3.07598	-3.07598	-1.62104	Unknown	#N/A
CUST_2344_PI443154341	0.004018	0.000659652	up	2.2796	2.2796	1.18878	Unknown	6666666.414137.peg.2309
CUST_3962_PI443154341	0.0164911	0.00716827	up	2.00348	2.00348	1.00251	Unknown	6666666.414137.peg.3887
CUST_1167_PI443154341	0.00293797	0.000335148	up	2.68658	2.68658	1.42577	Unknown	6666666.414137.peg.1148
CUST_1155_PI443154341	0.00198895	0.000111786	up	13.536	13.536	3.75873	Unknown	6666666.414137.peg.1136
CUST_1190_PI443154341	0.0162706	0.00702162	up	2.78088	2.78088	1.47554	Unknown	6666666.414137.peg.1171
CUST_1433_PI443154341	0.00167865	6.95186e-05	up	4.99102	4.99102	2.31934	Unknown	6666666.414137.peg.1412
CUST_4918_PI443154341	0.0374587	0.021558	up	3.28268	3.28268	1.71487	Unknown	6666666.414137.peg.4833
CUST_481_PI443154341	0.0216123	0.0104639	up	2.16308	2.16308	1.11308	Unknown	6666666.414137.peg.471
CUST_2016_PI443154341	0.00261026	0.000258238	up	2.62711	2.62711	1.39348	Unknown	#N/A
CUST_5005_PI443154341	0.00761926	0.0022263	up	13.3304	13.3304	3.73664	Unknown	6666666.414137.peg.4920
CUST_5287_PI443154341	0.000917137	8.08313e-06	up	42.7962	42.7962	5.41941	Unknown	6666666.414137.peg.5199
CUST_3773_PI443154341	0.0209806	0.0100197	up	2.27244	2.27244	1.18424	Unknown	6666666.414137.peg.3699
CUST_5511_PI443154341	0.0215683	0.0104244	up	2.86965	2.86965	1.52087	Unknown	#N/A
CUST_831_PI443154341	0.00245383	0.000194141	down	2.23133	-2.23133	-1.1579	Unknown	6666666.414137.repeat.6
CUST_3950_PI443154341	0.0044559	0.000828936	down	2.28681	-2.28681	-1.19334	Unknown	6666666.414137.peg.3876
CUST_5139_PI443154341	0.00254979	0.00021525	down	3.71072	-3.71072	-1.8917	Unknown	6666666.414137.repeat.42
CUST_2688_PI443154341	0.00252895	0.00020988	up	3.554	3.554	1.82944	Unknown	6666666.414137.peg.2641
CUST_4327_PI443154341	0.00363268	0.000533709	up	5.01978	5.01978	2.32762	Unknown	#N/A
CUST_4058_PI443154341	0.00558245	0.00128556	down	2.06139	-2.06139	-1.04362	Unknown	6666666.414137.peg.3982
CUST_2001_PI443154341	0.00783505	0.002337	up	3.14342	3.14342	1.65233	Unknown	6666666.414137.peg.1969
CUST_864_PI443154341	0.00995341	0.00347343	up	4.10669	4.10669	2.03797	Unknown	6666666.414137.peg.849
CUST_2304_PI443154341	0.021094	0.0100886	up	2.23936	2.23936	1.16309	Unknown	6666666.414137.peg.2269
CUST_3093_PI443154341	0.0135175	0.00545586	up	2.3386	2.3386	1.22564	Unknown	6666666.414137.peg.3036
CUST_3239_PI443154341	0.00241484	0.00017491	up	2.55867	2.55867	1.35539	Unknown	6666666.414137.peg.3181
CUST_1718_PI443154341	0.00159625	5.58966e-05	down	2.51414	-2.51414	-1.33007	Unknown	6666666.414137.peg.1688
CUST_521_PI443154341	0.0136111	0.00552275	up	2.27056	2.27056	1.18305	Unknown	#N/A
CUST_2655_PI443154341	0.0030585	0.000371946	up	2.5379	2.5379	1.34363	Unknown	6666666.414137.peg.2611
CUST_5189_PI443154341	0.00836313	0.0026127	up	2.39589	2.39589	1.26056	Unknown	6666666.414137.peg.5101
CUST_4248_PI443154341	0.0106677	0.00385158	up	2.58329	2.58329	1.36921	Unknown	6666666.414137.peg.4168
CUST_1456_PI443154341	0.00101243	1.36433e-05	up	30.6825	30.6825	4.93934	Unknown	6666666.414137.peg.1433
CUST_1173_PI443154341	0.0281903	0.0148402	up	2.00001	2.00001	1.00001	Unknown	6666666.414137.peg.1154
CUST_579_PI443154341	0.00134257	3.66662e-05	up	36.0442	36.0442	5.1717	Unknown	6666666.414137.peg.569
CUST_4000_PI443154341	0.00372906	0.00056207	down	2.21676	-2.21676	-1.14845	Unknown	#N/A
CUST_73_PI443154341	0.0060482	0.00149008	down	2.0041	-2.0041	-1.00295	Unknown	#N/A
CUST_4657_PI443154341	0.0029722	0.000346309	down	2.3419	-2.3419	-1.22768	Unknown	6666666.414137.peg.4574
CUST_3767_PI443154341	0.0058686	0.00139747	up	2.52944	2.52944	1.33882	Unknown	6666666.414137.peg.3693
CUST_1141_PI443154341	0.00106062	1.72093e-05	up	52.3667	52.3667	5.71058	Unknown	6666666.414137.peg.1122
CUST_2689_PI443154341	0.00821819	0.00254124	up	2.3979	2.3979	1.26177	Unknown	6666666.414137.peg.2642
CUST_4319_PI443154341	0.00793832	0.00238215	up	2.9471	2.9471	1.5593	Unknown	#N/A
CUST_5939_PI443154341	0.0468853	0.0284625	up	2.48459	2.48459	1.31301	Unknown	#N/A
CUST_3172_PI443154341	0.00189015	9.87784e-05	down	2.31732	-2.31732	-1.21246	Unknown	6666666.414137.peg.3114
CUST_5086_PI443154341	0.0176143	0.0078852	down	2.21383	-2.21383	-1.14654	Unknown	6666666.414137.peg.5000
CUST_794_PI443154341	0.00146653	4.54332e-05	down	4.79276	-4.79276	-2.26086	Unknown	#N/A
CUST_4740_PI443154341	0.00173601	7.86883e-05	down	2.52167	-2.52167	-1.33438	Unknown	6666666.414137.peg.4657
CUST_3333_PI443154341	0.00146022	4.48744e-05	up	3.3628	3.3628	1.74966	Unknown	6666666.414137.peg.3270
CUST_6024_PI443154341	0.00304721	0.000365064	up	2.75843	2.75843	1.46385	Unknown	6666666.414137.peg.5932
CUST_3924_PI443154341	0.0384924	0.022342	down	2.44455	-2.44455	-1.28957	Unknown	#N/A
CUST_58_PI443154341	0.00537842	0.00120625	down	2.01011	-2.01011	-1.00728	Unknown	6666666.414137.peg.57
CUST_2404_PI443154341	0.00135585	3.75861e-05	up	4.70957	4.70957	2.23559	Unknown	#N/A
CUST_4733_PI443154341	0.00216964	0.000135491	up	2.60569	2.60569	1.38167	Unknown	6666666.414137.peg.4650
CUST_5833_PI443154341	0.00173916	8.08323e-05	up	3.55982	3.55982	1.8318	Unknown	6666666.414137.peg.5744
CUST_1511_PI443154341	0.00168008	7.00404e-05	down	3.261	-3.261	-1.70531	Unknown	6666666.414137.repeat.13
CUST_5441_PI443154341	0.00768587	0.00227482	up	2.09757	2.09757	1.06872	Unknown	#N/A
CUST_1537_PI443154341	0.00199843	0.000114466	down	2.49713	-2.49713	-1.32027	Unknown	6666666.414137.peg.1509
CUST_4923_PI443154341	0.00878261	0.00285345	up	4.09685	4.09685	2.03452	Unknown	6666666.414137.peg.4838
CUST_955_PI443154341	0.00190057	0.000100573	down	2.24868	-2.24868	-1.16908	Unknown	#N/A
CUST_906_PI443154341	0.00308946	0.000379265	down	2.24579	-2.24579	-1.16722	Unknown	6666666.414137.peg.891
CUST_4407_PI443154341	0.0345134	0.0193468	up	2.69417	2.69417	1.42984	Unknown	6666666.414137.peg.4327
CUST_1670_PI443154341	0.00614471	0.00153218	up	3.80714	3.80714	1.92871	Unknown	6666666.414137.peg.1640
CUST_4865_PI443154341	0.00240496	0.000171529	down	2.56865	-2.56865	-1.36101	Unknown	6666666.414137.peg.4780
CUST_4256_PI443154341	0.00236688	0.000160549	down	2.24069	-2.24069	-1.16394	Unknown	6666666.414137.peg.4176
CUST_3934_PI443154341	0.0023683	0.000161539	down	2.21063	-2.21063	-1.14446	Unknown	6666666.414137.peg.3860
CUST_3311_PI443154341	0.00267383	0.000274741	down	2.0291	-2.0291	-1.02084	Unknown	6666666.414137.crispr_array.2
CUST_345_PI443154341	0.00159625	5.7974e-05	down	2.4945	-2.4945	-1.31875	Unknown	6666666.414137.peg.338
CUST_4810_PI443154341	0.00257147	0.000227665	down	2.55565	-2.55565	-1.35369	Unknown	#N/A
CUST_2588_PI443154341	0.00249127	0.00020375	up	2.32884	2.32884	1.21961	Unknown	6666666.414137.peg.2543
CUST_2557_PI443154341	0.00146022	4.47471e-05	up	2.80319	2.80319	1.48707	Unknown	6666666.414137.peg.2513
CUST_490_PI443154341	0.00241484	0.000176996	up	4.1988	4.1988	2.06998	Unknown	6666666.414137.peg.480
CUST_5929_PI443154341	0.00153817	5.02587e-05	down	2.72839	-2.72839	-1.44805	Unknown	#N/A
CUST_905_PI443154341	0.00590267	0.00141527	down	2.00307	-2.00307	-1.00221	Unknown	6666666.414137.peg.890
CUST_5342_PI443154341	0.0233066	0.0115901	up	2.17804	2.17804	1.12303	Unknown	6666666.414137.peg.5254
CUST_4047_PI443154341	0.00183704	9.31531e-05	up	2.27629	2.27629	1.18668	Unknown	6666666.414137.peg.3971
CUST_3596_PI443154341	0.00941473	0.00320116	up	2.36861	2.36861	1.24404	Unknown	6666666.414137.peg.3524
CUST_5364_PI443154341	0.00257147	0.000228449	down	2.02629	-2.02629	-1.01884	Unknown	6666666.414137.peg.5276
CUST_216_PI443154341	0.000773776	2.40261e-06	up	12.5099	12.5099	3.645	Unknown	6666666.414137.peg.209
CUST_5128_PI443154341	0.0155148	0.00658188	up	2.29644	2.29644	1.1994	Unknown	6666666.414137.peg.5042
CUST_4215_PI443154341	0.00211476	0.000128574	down	2.41685	-2.41685	-1.27313	Unknown	6666666.414137.peg.4135
CUST_5204_PI443154341	0.00528852	0.00116653	up	2.11881	2.11881	1.08326	Unknown	6666666.414137.peg.5116
CUST_4563_PI443154341	0.0070862	0.00198555	up	3.32434	3.32434	1.73307	Unknown	6666666.414137.peg.4480
CUST_2225_PI443154341	0.00589573	0.00140698	down	2.04529	-2.04529	-1.0323	Unknown	6666666.414137.peg.2191
CUST_2360_PI443154341	0.00141913	4.05798e-05	down	3.06805	-3.06805	-1.61732	Unknown	6666666.414137.peg.2325
CUST_5254_PI443154341	0.00164174	6.04355e-05	up	3.17331	3.17331	1.66599	Unknown	#N/A
CUST_284_PI443154341	0.00103294	1.57883e-05	up	4.1558	4.1558	2.05513	Unknown	6666666.414137.peg.277
CUST_597_PI443154341	0.00407055	0.000672853	up	2.21529	2.21529	1.14749	Unknown	6666666.414137.peg.587
CUST_584_PI443154341	0.000883675	4.43225e-06	up	7.09488	7.09488	2.82678	Unknown	6666666.414137.peg.574
CUST_3485_PI443154341	0.00843059	0.00265983	up	2.02649	2.02649	1.01898	Unknown	#N/A
CUST_20_PI443154341	0.000883675	5.46057e-06	down	8.11369	-8.11369	-3.02036	Unknown	6666666.414137.peg.19
CUST_4970_PI443154341	0.00889461	0.00292345	down	3.94835	-3.94835	-1.98125	Unknown	6666666.414137.peg.4885
CUST_1441_PI443154341	0.00421868	0.000743209	up	2.54292	2.54292	1.34649	Unknown	#N/A
CUST_5570_PI443154341	0.0014341	4.14632e-05	up	2.95051	2.95051	1.56097	Unknown	#N/A
CUST_863_PI443154341	0.00472571	0.00092961	up	2.57701	2.57701	1.3657	Unknown	6666666.414137.peg.848
CUST_3462_PI443154341	0.00257147	0.000235664	up	3.20139	3.20139	1.6787	Unknown	6666666.414137.peg.3394
CUST_1771_PI443154341	0.00236688	0.000161033	down	2.51958	-2.51958	-1.33318	Unknown	6666666.414137.peg.1740
CUST_5632_PI443154341	0.00434819	0.000793531	up	4.98928	4.98928	2.31883	Unknown	6666666.414137.peg.5544
CUST_543_PI443154341	0.00199855	0.000114954	up	2.18317	2.18317	1.12642	Unknown	6666666.414137.peg.533
CUST_203_PI443154341	0.00146022	4.40318e-05	up	5.70794	5.70794	2.51297	Unknown	6666666.414137.peg.199
CUST_4639_PI443154341	0.00218596	0.00013892	up	5.01501	5.01501	2.32625	Unknown	6666666.414137.peg.4556
CUST_5450_PI443154341	0.00845671	0.0026739	down	2.16371	-2.16371	-1.11351	Unknown	6666666.414137.peg.5362
CUST_183_PI443154341	0.00838314	0.00262344	down	2.14155	-2.14155	-1.09866	Unknown	6666666.414137.peg.179
CUST_586_PI443154341	0.00262484	0.000263131	up	17.0284	17.0284	4.08987	Unknown	6666666.414137.peg.576
CUST_3974_PI443154341	0.00294144	0.000340308	up	4.34953	4.34953	2.12086	Unknown	6666666.414137.peg.3898
CUST_4147_PI443154341	0.00800267	0.0024225	up	4.07222	4.07222	2.02581	Unknown	6666666.414137.peg.4067
CUST_2854_PI443154341	0.00393298	0.000636645	up	2.56704	2.56704	1.3601	Unknown	#N/A
CUST_2725_PI443154341	0.00579236	0.00136504	up	2.60374	2.60374	1.38059	Unknown	6666666.414137.peg.2677
CUST_5553_PI443154341	0.0105765	0.00380304	up	2.47804	2.47804	1.3092	Unknown	6666666.414137.peg.5465
CUST_1815_PI443154341	0.00259602	0.000251693	down	2.4274	-2.4274	-1.27941	Unknown	6666666.414137.peg.1784
CUST_591_PI443154341	0.00134257	3.66909e-05	up	16.5661	16.5661	4.05016	Unknown	6666666.414137.peg.581
CUST_4096_PI443154341	0.00235524	0.000157549	up	2.0219	2.0219	1.01572	Unknown	6666666.414137.peg.4016
CUST_4494_PI443154341	0.0024457	0.00018431	up	2.4408	2.4408	1.28735	Unknown	#N/A
CUST_2407_PI443154341	0.00701901	0.00196034	up	5.13498	5.13498	2.36036	Unknown	#N/A
CUST_1323_PI443154341	0.0184639	0.00838366	up	2.5087	2.5087	1.32694	Unknown	#N/A
CUST_368_PI443154341	0.0284551	0.0150763	up	3.19705	3.19705	1.67674	Unknown	#N/A
CUST_2575_PI443154341	0.00359576	0.00051883	down	5.19833	-5.19833	-2.37805	Unknown	6666666.414137.peg.2530
CUST_2391_PI443154341	0.00392402	0.000628101	up	2.69885	2.69885	1.43235	Unknown	6666666.414137.rna.24
CUST_5952_PI443154341	0.00433501	0.000787333	up	3.32849	3.32849	1.73487	Unknown	6666666.414137.peg.5862
CUST_3066_PI443154341	0.017757	0.00797321	up	2.60344	2.60344	1.38042	Unknown	6666666.414137.peg.3010
CUST_186_PI443154341	0.00212041	0.00012928	up	7.75859	7.75859	2.95579	Unknown	6666666.414137.peg.182
CUST_2656_PI443154341	0.00203552	0.000119599	up	2.29709	2.29709	1.19981	Unknown	6666666.414137.peg.2612
CUST_3250_PI443154341	0.0166357	0.00725301	up	2.48361	2.48361	1.31244	Unknown	6666666.414137.peg.3192
CUST_269_PI443154341	0.00429157	0.000772272	up	2.67917	2.67917	1.42179	Unknown	6666666.414137.peg.262
CUST_4860_PI443154341	0.00168152	7.12752e-05	down	2.41825	-2.41825	-1.27397	Unknown	#N/A
CUST_2337_PI443154341	0.000917137	1.03786e-05	up	5.00283	5.00283	2.32274	Unknown	6666666.414137.peg.2302
CUST_1348_PI443154341	0.00239883	0.00016947	up	6.81239	6.81239	2.76816	Unknown	#N/A
CUST_837_PI443154341	0.0188455	0.00865932	up	2.28678	2.28678	1.19332	Unknown	6666666.414137.peg.822
CUST_3121_PI443154341	0.0140257	0.00573729	up	2.42148	2.42148	1.27589	Unknown	6666666.414137.peg.3063
CUST_5338_PI443154341	0.00422868	0.000748445	up	4.45675	4.45675	2.15599	Unknown	6666666.414137.peg.5250
CUST_1689_PI443154341	0.00372906	0.000562576	up	3.59025	3.59025	1.84408	Unknown	6666666.414137.peg.1659
CUST_2438_PI443154341	0.00255015	0.000220816	up	2.61677	2.61677	1.38779	Unknown	6666666.414137.peg.2400
CUST_5051_PI443154341	0.0126681	0.00498138	up	2.32649	2.32649	1.21816	Unknown	6666666.414137.peg.4966
CUST_2168_PI443154341	0.00245383	0.000194371	up	2.02805	2.02805	1.02009	Unknown	6666666.414137.peg.2134
CUST_3508_PI443154341	0.0045112	0.000851086	up	2.29446	2.29446	1.19816	Unknown	#N/A
CUST_3804_PI443154341	0.0023858	0.000165458	down	2.11728	-2.11728	-1.08221	Unknown	6666666.414137.peg.3730
CUST_309_PI443154341	0.00118797	2.59057e-05	up	22.8413	22.8413	4.51357	Unknown	#N/A
CUST_3460_PI443154341	0.00159625	5.64881e-05	up	4.93433	4.93433	2.30285	Unknown	6666666.414137.peg.3392
CUST_33_PI443154341	0.00513842	0.00110537	up	3.00821	3.00821	1.58891	Unknown	6666666.414137.peg.32
CUST_21_PI443154341	0.000883675	5.70024e-06	down	7.85987	-7.85987	-2.97451	Unknown	6666666.414137.peg.20
CUST_1708_PI443154341	0.00117042	2.29931e-05	up	5.42697	5.42697	2.44015	Unknown	6666666.414137.peg.1678
CUST_3322_PI443154341	0.00281471	0.000304869	up	14.0369	14.0369	3.81115	Unknown	#N/A
CUST_232_PI443154341	0.00249127	0.000202863	down	2.20418	-2.20418	-1.14024	Unknown	6666666.414137.peg.225
CUST_3522_PI443154341	0.0115308	0.00429585	up	4.38522	4.38522	2.13265	Unknown	6666666.414137.peg.3450
CUST_451_PI443154341	0.0021601	0.000134331	up	4.18086	4.18086	2.0638	Unknown	6666666.414137.peg.441
CUST_583_PI443154341	0.000883675	5.16125e-06	up	5.90396	5.90396	2.56168	Unknown	6666666.414137.peg.573
CUST_4339_PI443154341	0.00224716	0.000145166	up	2.08637	2.08637	1.06099	Unknown	6666666.414137.peg.4259
CUST_4731_PI443154341	0.00299998	0.000350101	up	2.10848	2.10848	1.07621	Unknown	6666666.414137.peg.4648
CUST_5719_PI443154341	0.00258085	0.000240514	down	2.42755	-2.42755	-1.2795	Unknown	6666666.414137.peg.5631
CUST_296_PI443154341	0.00301562	0.000353689	up	4.8637	4.8637	2.28205	Unknown	6666666.414137.peg.289
CUST_3480_PI443154341	0.0213718	0.0102697	up	2.02547	2.02547	1.01825	Unknown	6666666.414137.repeat.35
CUST_790_PI443154341	0.00166893	6.69217e-05	up	3.11922	3.11922	1.64118	Unknown	6666666.414137.peg.777
CUST_2853_PI443154341	0.00905725	0.00299775	up	2.2608	2.2608	1.17683	Unknown	6666666.414137.peg.2802
CUST_3819_PI443154341	0.00320769	0.000410648	up	2.27412	2.27412	1.18531	Unknown	6666666.414137.peg.3745
CUST_959_PI443154341	0.0023645	0.000158928	up	4.61177	4.61177	2.20532	Unknown	6666666.414137.peg.944
CUST_2232_PI443154341	0.00713934	0.00200629	down	2.51395	-2.51395	-1.32996	Unknown	6666666.414137.peg.2198
CUST_3483_PI443154341	0.00255015	0.000216147	up	3.80214	3.80214	1.92681	Unknown	#N/A
CUST_5930_PI443154341	0.0221158	0.0108344	down	2.01044	-2.01044	-1.00751	Unknown	6666666.414137.peg.5840
CUST_3695_PI443154341	0.00845986	0.00268578	up	4.1353	4.1353	2.04799	Unknown	6666666.414137.peg.3623
CUST_4790_PI443154341	0.00795162	0.00239841	up	2.14281	2.14281	1.09951	Unknown	6666666.414137.peg.4705
CUST_1601_PI443154341	0.0034025	0.000468959	up	3.83621	3.83621	1.93968	Unknown	6666666.414137.peg.1573
CUST_1066_PI443154341	0.00811703	0.00247606	up	2.27424	2.27424	1.18538	Unknown	6666666.414137.peg.1050
CUST_5004_PI443154341	0.00387061	0.000610647	up	29.3265	29.3265	4.87413	Unknown	6666666.414137.peg.4919
CUST_2974_PI443154341	0.00768587	0.00227722	up	2.01994	2.01994	1.01431	Unknown	#N/A
CUST_5749_PI443154341	0.00189046	9.92414e-05	up	2.5618	2.5618	1.35716	Unknown	6666666.414137.peg.5661
CUST_3975_PI443154341	0.0129061	0.00512003	up	4.25911	4.25911	2.09055	Unknown	#N/A
CUST_5345_PI443154341	0.0272671	0.0142049	up	2.57008	2.57008	1.36181	Unknown	6666666.414137.peg.5257
CUST_2447_PI443154341	0.00249375	0.00020532	down	2.69448	-2.69448	-1.43001	Unknown	6666666.414137.peg.2405
CUST_2345_PI443154341	0.00262484	0.000261975	up	3.96096	3.96096	1.98585	Unknown	6666666.414137.peg.2310
CUST_3160_PI443154341	0.00558245	0.00128621	up	2.06031	2.06031	1.04286	Unknown	#N/A
CUST_292_PI443154341	0.00254979	0.000215381	up	3.70311	3.70311	1.88874	Unknown	6666666.414137.peg.285
CUST_1317_PI443154341	0.00686462	0.0018896	up	2.55697	2.55697	1.35444	Unknown	6666666.414137.peg.1297
CUST_252_PI443154341	0.033195	0.0184277	up	3.2741	3.2741	1.7111	Unknown	6666666.414137.peg.245
CUST_666_PI443154341	0.0027798	0.000298309	up	2.10598	2.10598	1.07449	Unknown	6666666.414137.peg.655
CUST_2100_PI443154341	0.00322701	0.000420174	down	2.00501	-2.00501	-1.00361	Unknown	6666666.414137.peg.2067
CUST_2303_PI443154341	0.0196318	0.00915938	up	2.44757	2.44757	1.29135	Unknown	6666666.414137.peg.2268
CUST_4260_PI443154341	0.00624588	0.00158585	up	7.92385	7.92385	2.9862	Unknown	6666666.414137.peg.4180
CUST_578_PI443154341	0.000763472	1.12921e-06	up	16.3848	16.3848	4.03429	Unknown	#N/A
CUST_542_PI443154341	0.0030266	0.000360486	up	27.2164	27.2164	4.7664	Unknown	6666666.414137.peg.532
CUST_899_PI443154341	0.000773776	1.59918e-06	up	30.9126	30.9126	4.95012	Unknown	6666666.414137.peg.884
CUST_1993_PI443154341	0.00372681	0.000560399	down	2.13999	-2.13999	-1.09761	Unknown	6666666.414137.rna.21
CUST_5808_PI443154341	0.0024457	0.000184483	up	5.20733	5.20733	2.38054	Unknown	6666666.414137.peg.5719
CUST_5200_PI443154341	0.0172393	0.00761531	up	3.88899	3.88899	1.9594	Unknown	6666666.414137.peg.5112
CUST_4647_PI443154341	0.0132629	0.00530516	up	2.01687	2.01687	1.01212	Unknown	#N/A
CUST_2767_PI443154341	0.0380976	0.022032	up	2.24491	2.24491	1.16666	Unknown	6666666.414137.peg.2717
CUST_3260_PI443154341	0.0114143	0.00423745	up	2.90459	2.90459	1.53834	Unknown	#N/A
CUST_4980_PI443154341	0.00257147	0.000230768	down	2.07059	-2.07059	-1.05004	Unknown	6666666.414137.peg.4895
CUST_4963_PI443154341	0.00258773	0.000246721	up	2.40721	2.40721	1.26737	Unknown	#N/A
CUST_615_PI443154341	0.00173601	7.72188e-05	up	2.52	2.52	1.33343	Unknown	6666666.414137.peg.605
CUST_1871_PI443154341	0.00354465	0.000508542	up	16.2466	16.2466	4.02207	Unknown	6666666.414137.peg.1840
CUST_580_PI443154341	0.00106062	1.81273e-05	up	22.2155	22.2155	4.4735	Unknown	6666666.414137.peg.570
CUST_5026_PI443154341	0.00139078	3.90836e-05	up	4.36144	4.36144	2.1248	Unknown	6666666.414137.peg.4941
CUST_1792_PI443154341	0.00266049	0.000270138	down	2.81522	-2.81522	-1.49325	Unknown	6666666.414137.peg.1761
CUST_486_PI443154341	0.00351354	0.00049715	up	2.32297	2.32297	1.21597	Unknown	6666666.414137.peg.476
CUST_3472_PI443154341	0.00185877	9.53057e-05	up	4.89942	4.89942	2.29261	Unknown	6666666.414137.peg.3404
CUST_5527_PI443154341	0.00665746	0.00177569	up	2.01909	2.01909	1.01371	Unknown	6666666.414137.peg.5439
CUST_3235_PI443154341	0.0111449	0.00408799	up	2.78025	2.78025	1.47522	Unknown	#N/A
CUST_2257_PI443154341	0.00460844	0.000887607	down	2.00859	-2.00859	-1.00619	Unknown	6666666.414137.peg.2223
CUST_3710_PI443154341	0.00322701	0.000418844	up	3.69885	3.69885	1.88708	Unknown	6666666.414137.peg.3637
CUST_1512_PI443154341	0.00371887	0.00055615	down	2.13119	-2.13119	-1.09166	Unknown	#N/A
CUST_3928_PI443154341	0.0122842	0.00473403	up	3.26266	3.26266	1.70605	Unknown	6666666.414137.peg.3854
CUST_604_PI443154341	0.00845986	0.0026862	up	2.84315	2.84315	1.50749	Unknown	6666666.414137.peg.594
CUST_5712_PI443154341	0.00293797	0.000333036	down	2.37637	-2.37637	-1.24876	Unknown	6666666.414137.peg.5624
CUST_923_PI443154341	0.0286031	0.0151876	up	2.03226	2.03226	1.02309	Unknown	6666666.414137.peg.908
CUST_4036_PI443154341	0.00392988	0.000634205	down	2.02533	-2.02533	-1.01816	Unknown	6666666.414137.peg.3960
CUST_4262_PI443154341	0.0115586	0.00431473	up	7.39342	7.39342	2.88624	Unknown	6666666.414137.peg.4182
CUST_4816_PI443154341	0.00977385	0.00338591	up	3.6483	3.6483	1.86723	Unknown	#N/A
CUST_1111_PI443154341	0.0027891	0.000300143	up	2.1256	2.1256	1.08787	Unknown	#N/A
CUST_2335_PI443154341	0.0250776	0.0127799	up	2.04682	2.04682	1.03338	Unknown	6666666.414137.peg.2300
CUST_2604_PI443154341	0.00568396	0.00132641	down	2.9828	-2.9828	-1.57667	Unknown	6666666.414137.peg.2559
CUST_5241_PI443154341	0.00412109	0.00069381	down	2.0356	-2.0356	-1.02545	Unknown	6666666.414137.peg.5153
CUST_1917_PI443154341	0.00449491	0.000842104	up	2.01765	2.01765	1.01267	Unknown	6666666.414137.peg.1886
CUST_202_PI443154341	0.0126796	0.00499684	up	4.62837	4.62837	2.21051	Unknown	6666666.414137.peg.198
CUST_2187_PI443154341	0.0171853	0.00757452	up	2.74098	2.74098	1.45469	Unknown	#N/A
CUST_369_PI443154341	0.0181652	0.00821539	up	4.27277	4.27277	2.09517	Unknown	6666666.414137.peg.362
CUST_3424_PI443154341	0.00173601	7.72494e-05	down	2.33382	-2.33382	-1.2227	Unknown	6666666.414137.peg.3357
CUST_1095_PI443154341	0.00845986	0.0026888	down	2.27852	-2.27852	-1.18809	Unknown	6666666.414137.peg.1078
CUST_1868_PI443154341	0.00696888	0.001937	up	2.30842	2.30842	1.2069	Unknown	6666666.414137.peg.1837
CUST_2610_PI443154341	0.00159625	5.65969e-05	down	3.04707	-3.04707	-1.60743	Unknown	#N/A
CUST_1235_PI443154341	0.00407649	0.000676928	up	3.17778	3.17778	1.66802	Unknown	6666666.414137.peg.1216
CUST_5276_PI443154341	0.0283491	0.0149741	up	2.12332	2.12332	1.08632	Unknown	6666666.414137.peg.5188
CUST_5605_PI443154341	0.00177241	8.45388e-05	down	2.60977	-2.60977	-1.38392	Unknown	6666666.414137.peg.5517
CUST_4800_PI443154341	0.00515087	0.0011089	up	2.03937	2.03937	1.02812	Unknown	6666666.414137.peg.4715
CUST_2690_PI443154341	0.0030266	0.00035745	up	2.47733	2.47733	1.30879	Unknown	6666666.414137.peg.2643
CUST_3565_PI443154341	0.00274372	0.00029083	up	6.34212	6.34212	2.66497	Unknown	6666666.414137.peg.3493
CUST_1710_PI443154341	0.00198895	0.000111323	up	4.23373	4.23373	2.08193	Unknown	6666666.414137.peg.1680
CUST_4216_PI443154341	0.00352645	0.000501364	up	2.1518	2.1518	1.10554	Unknown	6666666.414137.peg.4136
CUST_2289_PI443154341	0.00249375	0.000205161	up	2.00167	2.00167	1.0012	Unknown	6666666.414137.peg.2255
CUST_4361_PI443154341	0.0021601	0.00013373	up	8.55526	8.55526	3.09681	Unknown	6666666.414137.peg.4281
CUST_5263_PI443154341	0.00476762	0.000951645	up	2.04734	2.04734	1.03375	Unknown	6666666.414137.peg.5175
DCP_22_9	0.0015435	5.07313e-05	down	3.90672	-3.90672	-1.96596	Unknown	#N/A
CUST_5899_PI443154341	0.0103566	0.00368311	up	2.37262	2.37262	1.24648	Unknown	6666666.414137.peg.5809
CUST_1722_PI443154341	0.000917137	1.11708e-05	up	4.62779	4.62779	2.21032	Unknown	6666666.414137.peg.1692
CUST_505_PI443154341	0.00427895	0.000767567	up	2.39555	2.39555	1.26036	Unknown	6666666.414137.peg.495
DCP_20_5	0.00458476	0.00088154	down	2.70089	-2.70089	-1.43343	Unknown	#N/A
CUST_5083_PI443154341	0.00942022	0.00320458	up	2.12145	2.12145	1.08505	Unknown	6666666.414137.peg.4997
CUST_5509_PI443154341	0.00680238	0.00185906	up	2.1145	2.1145	1.08031	Unknown	6666666.414137.peg.5421
CUST_693_PI443154341	0.00421746	0.000739528	up	2.3292	2.3292	1.21983	Unknown	#N/A
CUST_622_PI443154341	0.00146022	4.4007e-05	up	4.20988	4.20988	2.07378	Unknown	6666666.414137.peg.612
CUST_539_PI443154341	0.00563499	0.00130494	up	3.23477	3.23477	1.69366	Unknown	6666666.414137.peg.529
CUST_5036_PI443154341	0.00259602	0.000253399	up	2.21347	2.21347	1.14631	Unknown	6666666.414137.peg.4951
CUST_4159_PI443154341	0.00397564	0.000646817	up	5.00876	5.00876	2.32445	Unknown	6666666.414137.peg.4079
CUST_5549_PI443154341	0.0156221	0.00664163	up	2.61192	2.61192	1.38511	Unknown	6666666.414137.peg.5461
CUST_2004_PI443154341	0.00477236	0.000966694	up	4.51739	4.51739	2.17549	Unknown	6666666.414137.peg.1972
CUST_487_PI443154341	0.012057	0.0046009	up	2.04923	2.04923	1.03508	Unknown	6666666.414137.peg.477
CUST_12_PI443154341	0.00696888	0.00193777	up	2.7308	2.7308	1.44932	Unknown	6666666.414137.peg.11
CUST_677_PI443154341	0.00741205	0.00213224	up	2.64821	2.64821	1.40502	Unknown	6666666.414137.peg.666
CUST_3257_PI443154341	0.00611169	0.00151964	up	3.66581	3.66581	1.87413	Unknown	6666666.414137.peg.3199
CUST_5884_PI443154341	0.0135017	0.00544729	up	2.73004	2.73004	1.44892	Unknown	6666666.414137.peg.5794
CUST_2548_PI443154341	0.0224919	0.0110593	up	2.42076	2.42076	1.27546	Unknown	6666666.414137.peg.2504
CUST_5944_PI443154341	0.0196278	0.00915425	up	2.30923	2.30923	1.20741	Unknown	6666666.414137.peg.5854
CUST_5872_PI443154341	0.00259602	0.000252597	down	2.4889	-2.4889	-1.31551	Unknown	6666666.414137.peg.5783
CUST_200_PI443154341	0.0199417	0.00937277	up	3.29933	3.29933	1.72217	Unknown	6666666.414137.peg.196
DCP_22_0	0.00605213	0.00149787	down	8.97621	-8.97621	-3.16611	Unknown	#N/A
CUST_1427_PI443154341	0.00127758	3.21231e-05	down	3.86156	-3.86156	-1.94918	Unknown	#N/A
CUST_3624_PI443154341	0.00182427	8.99394e-05	up	4.88641	4.88641	2.28878	Unknown	#N/A
DCP_22_4	0.00245383	0.000193042	down	7.53587	-7.53587	-2.91377	Unknown	#N/A
CUST_3354_PI443154341	0.00322227	0.000414633	up	6.84154	6.84154	2.77432	Unknown	6666666.414137.peg.3290
CUST_1405_PI443154341	0.0013373	3.60422e-05	up	7.99791	7.99791	2.99962	Unknown	6666666.414137.peg.1384
CUST_2213_PI443154341	0.00501439	0.00106056	up	2.5517	2.5517	1.35146	Unknown	#N/A
DCP_20_3	0.0166038	0.00723093	down	2.14357	-2.14357	-1.10002	Unknown	#N/A
CUST_513_PI443154341	0.0056083	0.00129493	down	2.25769	-2.25769	-1.17485	Unknown	6666666.414137.peg.503
CUST_4001_PI443154341	0.00477537	0.000972088	up	2.01728	2.01728	1.01241	Unknown	6666666.414137.peg.3925
CUST_340_PI443154341	0.00254007	0.000213725	down	2.3975	-2.3975	-1.26153	Unknown	6666666.414137.peg.333
CUST_4237_PI443154341	0.00419715	0.000726137	up	3.80647	3.80647	1.92845	Unknown	6666666.414137.peg.4157
CUST_2629_PI443154341	0.0076349	0.00223788	up	2.31565	2.31565	1.21142	Unknown	6666666.414137.peg.2585
CUST_3540_PI443154341	0.0018802	9.75144e-05	down	2.25721	-2.25721	-1.17454	Unknown	6666666.414137.peg.3468
CUST_4278_PI443154341	0.00392988	0.000634024	down	2.25829	-2.25829	-1.17523	Unknown	6666666.414137.peg.4198
CUST_895_PI443154341	0.000917137	7.69119e-06	up	9.64928	9.64928	3.27042	Unknown	6666666.414137.peg.880
CUST_3825_PI443154341	0.00599271	0.00145952	down	2.26142	-2.26142	-1.17723	Unknown	6666666.414137.peg.3751
CUST_3468_PI443154341	0.00255085	0.000221758	up	6.18943	6.18943	2.62981	Unknown	6666666.414137.peg.3400
CUST_673_PI443154341	0.00166822	6.58613e-05	up	2.9921	2.9921	1.58116	Unknown	6666666.414137.peg.662
DCP_22_2	0.00477236	0.00096679	down	9.1645	-9.1645	-3.19606	Unknown	#N/A
CUST_900_PI443154341	0.00309715	0.000381226	up	4.02861	4.02861	2.01028	Unknown	6666666.414137.peg.885
CUST_4443_PI443154341	0.000883675	5.76398e-06	down	6.4682	-6.4682	-2.69336	Unknown	#N/A
CUST_5212_PI443154341	0.00300328	0.00035141	up	6.33915	6.33915	2.66429	Unknown	6666666.414137.peg.5124
CUST_830_PI443154341	0.00160377	5.86526e-05	down	2.50217	-2.50217	-1.32318	Unknown	6666666.414137.peg.817
CUST_4806_PI443154341	0.0283491	0.0149805	up	2.07557	2.07557	1.05351	Unknown	6666666.414137.peg.4721
CUST_4674_PI443154341	0.00703908	0.00197084	down	2.07726	-2.07726	-1.05468	Unknown	#N/A
CUST_3587_PI443154341	0.00241484	0.000174028	up	2.05688	2.05688	1.04046	Unknown	6666666.414137.peg.3515
CUST_2830_PI443154341	0.00258277	0.000243642	up	2.57682	2.57682	1.36559	Unknown	6666666.414137.peg.2779
CUST_5555_PI443154341	0.00318855	0.000404713	up	2.37378	2.37378	1.24719	Unknown	6666666.414137.peg.5467
CUST_448_PI443154341	0.0271477	0.014107	up	2.33072	2.33072	1.22077	Unknown	#N/A
CUST_5013_PI443154341	0.00242507	0.000179272	up	11.454	11.454	3.51778	Unknown	#N/A
CUST_5193_PI443154341	0.00293797	0.000336942	up	3.25024	3.25024	1.70055	Unknown	6666666.414137.peg.5105
CUST_4678_PI443154341	0.0117452	0.00443559	up	3.02125	3.02125	1.59514	Unknown	6666666.414137.peg.4595
CUST_6013_PI443154341	0.00253256	0.00021163	up	2.16974	2.16974	1.11752	Unknown	6666666.414137.peg.5922
CUST_588_PI443154341	0.00304001	0.000363203	up	3.07607	3.07607	1.62109	Unknown	#N/A
CUST_2804_PI443154341	0.00197695	0.000108838	up	9.61011	9.61011	3.26455	Unknown	6666666.414137.peg.2754
CUST_3715_PI443154341	0.00383477	0.000592388	up	3.1138	3.1138	1.63868	Unknown	6666666.414137.peg.3642
CUST_5625_PI443154341	0.0113447	0.00418923	up	2.50846	2.50846	1.3268	Unknown	6666666.414137.peg.5537
CUST_5398_PI443154341	0.00660429	0.00174952	up	3.37893	3.37893	1.75656	Unknown	6666666.414137.peg.5310
CUST_167_PI443154341	0.00177043	8.40844e-05	up	2.28575	2.28575	1.19266	Unknown	#N/A
CUST_5371_PI443154341	0.00909161	0.00301446	up	2.91504	2.91504	1.54352	Unknown	#N/A
DCP_22_6	0.0085864	0.00275162	down	7.78674	-7.78674	-2.96102	Unknown	#N/A
CUST_236_PI443154341	0.00603637	0.00148404	up	4.90734	4.90734	2.29494	Unknown	#N/A
CUST_2798_PI443154341	0.0146767	0.00613115	up	2.42433	2.42433	1.27758	Unknown	6666666.414137.peg.2748
CUST_5059_PI443154341	0.00259602	0.000253416	down	2.62954	-2.62954	-1.39481	Unknown	6666666.414137.peg.4974
CUST_2284_PI443154341	0.00305141	0.000367325	up	4.4126	4.4126	2.14163	Unknown	#N/A
CUST_68_PI443154341	0.00633754	0.00161849	down	2.67848	-2.67848	-1.42141	Unknown	6666666.414137.peg.67
CUST_928_PI443154341	0.0244857	0.0124018	up	2.09969	2.09969	1.07018	Unknown	6666666.414137.peg.913
CUST_1383_PI443154341	0.0221293	0.0108446	up	2.29772	2.29772	1.2002	Unknown	#N/A
CUST_5881_PI443154341	0.0359458	0.0204941	up	3.50107	3.50107	1.8078	Unknown	6666666.414137.peg.5791
CUST_5487_PI443154341	0.00231359	0.000152909	up	4.80953	4.80953	2.2659	Unknown	6666666.414137.peg.5399
CUST_1639_PI443154341	0.00241484	0.000175276	up	4.50155	4.50155	2.17042	Unknown	6666666.414137.peg.1609
CUST_3787_PI443154341	0.00218596	0.000138508	down	2.42673	-2.42673	-1.27902	Unknown	#N/A
CUST_5197_PI443154341	0.00868207	0.0027974	up	3.74478	3.74478	1.90488	Unknown	6666666.414137.peg.5109
CUST_262_PI443154341	0.00313407	0.000391952	up	2.08283	2.08283	1.05855	Unknown	6666666.414137.peg.255
CUST_2660_PI443154341	0.000917137	9.66199e-06	down	4.40732	-4.40732	-2.1399	Unknown	6666666.414137.peg.2615
CUST_2731_PI443154341	0.00257147	0.000235943	up	3.10684	3.10684	1.63545	Unknown	6666666.414137.peg.2683
CUST_3356_PI443154341	0.00156794	5.23077e-05	up	3.04303	3.04303	1.60551	Unknown	6666666.414137.peg.3292
CUST_3355_PI443154341	0.00166822	6.53497e-05	up	2.97873	2.97873	1.5747	Unknown	6666666.414137.peg.3291
CUST_383_PI443154341	0.0064557	0.00167625	up	2.14926	2.14926	1.10384	Unknown	6666666.414137.peg.376
DCP_20_0	0.00912613	0.00304673	down	2.40256	-2.40256	-1.26457	Unknown	#N/A
CUST_1150_PI443154341	0.00263767	0.000266151	up	4.35627	4.35627	2.12309	Unknown	6666666.414137.peg.1131
DCP_22_7	0.00383477	0.000592339	down	6.80184	-6.80184	-2.76593	Unknown	#N/A
CUST_989_PI443154341	0.00318999	0.000406618	up	2.80179	2.80179	1.48635	Unknown	6666666.414137.peg.974
CUST_294_PI443154341	0.00166822	6.62242e-05	up	4.10151	4.10151	2.03615	Unknown	6666666.414137.peg.287
CUST_2208_PI443154341	0.0057559	0.0013555	up	2.90522	2.90522	1.53865	Unknown	#N/A
CUST_2617_PI443154341	0.0024037	0.000170649	up	2.10766	2.10766	1.07564	Unknown	6666666.414137.peg.2572
CUST_1007_PI443154341	0.00171707	7.4778e-05	down	2.37426	-2.37426	-1.24748	Unknown	6666666.414137.peg.991
CUST_670_PI443154341	0.00669151	0.00180236	up	2.57087	2.57087	1.36226	Unknown	#N/A
CUST_3761_PI443154341	0.00875706	0.00284023	up	3.49874	3.49874	1.80684	Unknown	6666666.414137.peg.3687
CUST_3083_PI443154341	0.018917	0.00871083	up	2.03332	2.03332	1.02384	Unknown	6666666.414137.peg.3026
CUST_2166_PI443154341	0.00301562	0.000354186	down	2.4842	-2.4842	-1.31278	Unknown	6666666.414137.peg.2132
CUST_961_PI443154341	0.00322701	0.000422206	down	2.24062	-2.24062	-1.1639	Unknown	6666666.414137.peg.946
CUST_5378_PI443154341	0.0127801	0.00505113	up	3.4592	3.4592	1.79044	Unknown	#N/A
CUST_1212_PI443154341	0.00392433	0.000630584	up	2.26442	2.26442	1.17914	Unknown	6666666.414137.peg.1193
CUST_50_PI443154341	0.003678	0.000547244	up	2.52319	2.52319	1.33525	Unknown	6666666.414137.peg.49
CUST_5986_PI443154341	0.0174478	0.00778231	up	2.01446	2.01446	1.0104	Unknown	#N/A
CUST_1660_PI443154341	0.0022725	0.000149384	up	10.7071	10.7071	3.4205	Unknown	6666666.414137.peg.1630
CUST_1086_PI443154341	0.00257147	0.000233397	up	4.36562	4.36562	2.12619	Unknown	6666666.414137.peg.1069
CUST_5530_PI443154341	0.00412109	0.000691273	up	2.00895	2.00895	1.00644	Unknown	6666666.414137.peg.5442
CUST_2513_PI443154341	0.00811703	0.00247713	up	2.12193	2.12193	1.08538	Unknown	#N/A
CUST_5301_PI443154341	0.00614471	0.001533	up	6.69639	6.69639	2.74338	Unknown	6666666.414137.peg.5213
CUST_4020_PI443154341	0.00322701	0.000419957	up	8.72062	8.72062	3.12443	Unknown	6666666.414137.peg.3944
CUST_5652_PI443154341	0.00432955	0.000781951	down	3.65169	-3.65169	-1.86857	Unknown	#N/A
CUST_602_PI443154341	0.000917137	1.13041e-05	up	15.0279	15.0279	3.90957	Unknown	6666666.414137.peg.592
CUST_219_PI443154341	0.00320698	0.000410029	up	2.75397	2.75397	1.46151	Unknown	#N/A
CUST_2390_PI443154341	0.00166726	6.43888e-05	down	2.51678	-2.51678	-1.33158	Unknown	6666666.414137.peg.2353

## Sheet: Annotations
ProbeID	PrimaryAccession	RefSeqAccession	GenbankAccession	UniGeneID	EntrezGeneID	GeneSymbol	GeneName	EnsemblID	TIGRID	GO	Description	GenomicCoordinates	Cytoband
CUST_4134_PI443154341	6666666.414137.peg.4054
CUST_4287_PI443154341	6666666.414137.peg.4207
CUST_4145_PI443154341	6666666.414137.peg.4065
CUST_2236_PI443154341	6666666.414137.peg.2202
CUST_4192_PI443154341	6666666.414137.peg.4112
CUST_3917_PI443154341	6666666.414137.peg.3843
CUST_2325_PI443154341	6666666.414137.peg.2290
CUST_2281_PI443154341	6666666.414137.peg.2247
CUST_38_PI443154341	6666666.414137.peg.37
CUST_5101_PI443154341	6666666.414137.peg.5015
CUST_4324_PI443154341	6666666.414137.peg.4244
CUST_5612_PI443154341	6666666.414137.peg.5524
CUST_491_PI443154341	6666666.414137.peg.481
CUST_555_PI443154341	6666666.414137.peg.545
CUST_3585_PI443154341	6666666.414137.peg.3513
CUST_391_PI443154341	6666666.414137.peg.384
CUST_1555_PI443154341	6666666.414137.peg.1527
CUST_1789_PI443154341	6666666.414137.peg.1758
CUST_1777_PI443154341	6666666.414137.peg.1746
CUST_5614_PI443154341	6666666.414137.peg.5526
CUST_3544_PI443154341	6666666.414137.peg.3472
CUST_3910_PI443154341	6666666.414137.peg.3836
CUST_2502_PI443154341	6666666.414137.peg.2459
CUST_3276_PI443154341	6666666.414137.peg.3218
CUST_3358_PI443154341	6666666.414137.peg.3294
CUST_3801_PI443154341	6666666.414137.peg.3727
CUST_5569_PI443154341	6666666.414137.peg.5481
CUST_3289_PI443154341	6666666.414137.peg.3231
CUST_192_PI443154341	6666666.414137.peg.188
CUST_3827_PI443154341	6666666.414137.peg.3753
CUST_4309_PI443154341	6666666.414137.peg.4229
CUST_3086_PI443154341	6666666.414137.peg.3029
CUST_3236_PI443154341	6666666.414137.peg.3178
CUST_530_PI443154341	6666666.414137.peg.520
CUST_2935_PI443154341	6666666.414137.peg.2883
CUST_922_PI443154341	6666666.414137.peg.907
CUST_2440_PI443154341	6666666.414137.peg.2402
CUST_794_PI443154341	6666666.414137.peg.781
CUST_3195_PI443154341	6666666.414137.peg.3137
CUST_2567_PI443154341	6666666.414137.peg.2522
CUST_683_PI443154341	6666666.414137.peg.672
CUST_1700_PI443154341	6666666.414137.peg.1670
CUST_5384_PI443154341	6666666.414137.peg.5296
CUST_4976_PI443154341	6666666.414137.peg.4891
CUST_2773_PI443154341	6666666.414137.peg.2723
CUST_148_PI443154341	6666666.414137.peg.144
CUST_5166_PI443154341	6666666.414137.peg.5078
CUST_2302_PI443154341	6666666.414137.peg.2267
CUST_3656_PI443154341	6666666.414137.peg.3584
CUST_2223_PI443154341	6666666.414137.peg.2189
CUST_2020_PI443154341	6666666.414137.peg.1987
CUST_1494_PI443154341	6666666.414137.peg.1471
CUST_2791_PI443154341	6666666.414137.peg.2741
CUST_2975_PI443154341	6666666.414137.peg.2923
CUST_2216_PI443154341	6666666.414137.peg.2182
CUST_2797_PI443154341	6666666.414137.peg.2747
CUST_4799_PI443154341	6666666.414137.peg.4714
CUST_4816_PI443154341	6666666.414137.peg.4731
CUST_3458_PI443154341	6666666.414137.peg.3390
CUST_2902_PI443154341	6666666.414137.peg.2851
CUST_4703_PI443154341	6666666.414137.peg.4620
CUST_2631_PI443154341	6666666.414137.peg.2587
CUST_1111_PI443154341	6666666.414137.peg.1094
CUST_362_PI443154341	6666666.414137.peg.355
CUST_4633_PI443154341	6666666.414137.peg.4550
CUST_3770_PI443154341	6666666.414137.peg.3696
CUST_1415_PI443154341	6666666.414137.peg.1394
CUST_651_PI443154341	6666666.414137.peg.640
CUST_3542_PI443154341	6666666.414137.peg.3470
CUST_4720_PI443154341	6666666.414137.peg.4637
CUST_5369_PI443154341	6666666.414137.peg.5281
CUST_4676_PI443154341	6666666.414137.peg.4593
CUST_4061_PI443154341	6666666.414137.peg.3985
CUST_1863_PI443154341	6666666.414137.peg.1832
CUST_2190_PI443154341	6666666.414137.peg.2156
CUST_5056_PI443154341	6666666.414137.peg.4971
CUST_76_PI443154341	6666666.414137.peg.75
CUST_5544_PI443154341	6666666.414137.peg.5456
CUST_4622_PI443154341	6666666.414137.peg.4539
CUST_5778_PI443154341	6666666.414137.peg.5689
CUST_4529_PI443154341	6666666.414137.peg.4446
CUST_3813_PI443154341	6666666.414137.peg.3739
CUST_3118_PI443154341	6666666.414137.peg.3060
CUST_1059_PI443154341	6666666.414137.peg.1043
CUST_5560_PI443154341	6666666.414137.peg.5472
CUST_193_PI443154341	6666666.414137.peg.189
CUST_5214_PI443154341	6666666.414137.peg.5126
CUST_1170_PI443154341	6666666.414137.peg.1151
CUST_3756_PI443154341	6666666.414137.peg.3683
CUST_1720_PI443154341	6666666.414137.peg.1690
CUST_2495_PI443154341	6666666.414137.peg.2452
CUST_2592_PI443154341	6666666.414137.peg.2547
CUST_135_PI443154341	6666666.414137.peg.131
CUST_2680_PI443154341	6666666.414137.peg.2633
CUST_3886_PI443154341	6666666.414137.peg.3812
CUST_1038_PI443154341	6666666.414137.peg.1022
CUST_4510_PI443154341	6666666.414137.peg.4427
CUST_2516_PI443154341	6666666.414137.peg.2472
CUST_504_PI443154341	6666666.414137.peg.494
CUST_5395_PI443154341	6666666.414137.peg.5307
CUST_3755_PI443154341	6666666.414137.peg.3682
CUST_5353_PI443154341	6666666.414137.peg.5265
CUST_1422_PI443154341	6666666.414137.peg.1401
CUST_3247_PI443154341	6666666.414137.peg.3189
CUST_1678_PI443154341	6666666.414137.peg.1648
CUST_2530_PI443154341	6666666.414137.peg.2486
CUST_3709_PI443154341	6666666.414137.peg.3636
CUST_2638_PI443154341	6666666.414137.peg.2594
CUST_3787_PI443154341	6666666.414137.peg.3713
CUST_2547_PI443154341	6666666.414137.peg.2503
CUST_1899_PI443154341	6666666.414137.peg.1868
CUST_770_PI443154341	6666666.414137.peg.757
CUST_3122_PI443154341	6666666.414137.peg.3064
CUST_1972_PI443154341	6666666.414137.peg.1941
CUST_901_PI443154341	6666666.414137.peg.886
CUST_802_PI443154341	6666666.414137.peg.789
CUST_2901_PI443154341	6666666.414137.peg.2850
CUST_2628_PI443154341	6666666.414137.peg.2584
CUST_2312_PI443154341	6666666.414137.peg.2277
CUST_316_PI443154341	6666666.414137.peg.309
CUST_4747_PI443154341	6666666.414137.peg.4664
CUST_2912_PI443154341	6666666.414137.peg.2861
CUST_3655_PI443154341	6666666.414137.peg.3583
CUST_2376_PI443154341	6666666.414137.peg.2340
CUST_1353_PI443154341	6666666.414137.peg.1333
CUST_2999_PI443154341	6666666.414137.peg.2947
CUST_69_PI443154341	6666666.414137.peg.68
CUST_3221_PI443154341	6666666.414137.peg.3163
CUST_891_PI443154341	6666666.414137.peg.876
CUST_1642_PI443154341	6666666.414137.peg.1612
CUST_5929_PI443154341	6666666.414137.peg.5839
CUST_306_PI443154341	6666666.414137.peg.299
CUST_2359_PI443154341	6666666.414137.peg.2324
CUST_5161_PI443154341	6666666.414137.peg.5073
CUST_27_PI443154341	6666666.414137.peg.26
CUST_13_PI443154341	6666666.414137.peg.12
CUST_1315_PI443154341	6666666.414137.peg.1295
CUST_847_PI443154341	6666666.414137.peg.832
CUST_5042_PI443154341	6666666.414137.peg.4957
CUST_1070_PI443154341	6666666.414137.peg.1054
CUST_5662_PI443154341	6666666.414137.peg.5574
CUST_4810_PI443154341	6666666.414137.peg.4725
CUST_2765_PI443154341	6666666.414137.peg.2716
CUST_5720_PI443154341	6666666.414137.peg.5632
CUST_3877_PI443154341	6666666.414137.peg.3803
CUST_65_PI443154341	6666666.414137.peg.64
CUST_138_PI443154341	6666666.414137.peg.134
CUST_3786_PI443154341	6666666.414137.peg.3712
CUST_927_PI443154341	6666666.414137.peg.912
CUST_3783_PI443154341	6666666.414137.peg.3709
CUST_3105_PI443154341	6666666.414137.peg.3048
CUST_791_PI443154341	6666666.414137.peg.778
CUST_2540_PI443154341	6666666.414137.peg.2496
CUST_5986_PI443154341	6666666.414137.peg.5895
CUST_843_PI443154341	6666666.414137.peg.828
CUST_2982_PI443154341	6666666.414137.peg.2930
CUST_1406_PI443154341	6666666.414137.peg.1385
CUST_463_PI443154341	6666666.414137.peg.453
CUST_1249_PI443154341	6666666.414137.peg.1230
CUST_509_PI443154341	6666666.414137.peg.499
CUST_2748_PI443154341	6666666.414137.peg.2700
CUST_5471_PI443154341	6666666.414137.peg.5383
CUST_4206_PI443154341	6666666.414137.peg.4126
CUST_5107_PI443154341	6666666.414137.peg.5021
CUST_846_PI443154341	6666666.414137.peg.831
CUST_4647_PI443154341	6666666.414137.peg.4564
CUST_5029_PI443154341	6666666.414137.peg.4944
CUST_4065_PI443154341	6666666.414137.peg.3989
CUST_873_PI443154341	6666666.414137.peg.858
CUST_2609_PI443154341	6666666.414137.peg.2564
CUST_2591_PI443154341	6666666.414137.peg.2546
CUST_5378_PI443154341	6666666.414137.peg.5290
CUST_1981_PI443154341	6666666.414137.peg.1950
CUST_5941_PI443154341	6666666.414137.peg.5851
CUST_494_PI443154341	6666666.414137.peg.484
CUST_3047_PI443154341	6666666.414137.peg.2991
CUST_5459_PI443154341	6666666.414137.peg.5371
CUST_1858_PI443154341	6666666.414137.peg.1827
CUST_4079_PI443154341	6666666.414137.peg.4002
CUST_1504_PI443154341	6666666.414137.peg.1481
CUST_1814_PI443154341	6666666.414137.peg.1783
CUST_5191_PI443154341	6666666.414137.peg.5103
CUST_429_PI443154341	6666666.414137.peg.422
CUST_1180_PI443154341	6666666.414137.peg.1161
CUST_4273_PI443154341	6666666.414137.peg.4193
CUST_359_PI443154341	6666666.414137.peg.352
CUST_855_PI443154341	6666666.414137.peg.840
CUST_4038_PI443154341	6666666.414137.peg.3962
CUST_1102_PI443154341	6666666.414137.peg.1085
CUST_3205_PI443154341	6666666.414137.peg.3147
CUST_3260_PI443154341	6666666.414137.peg.3202
CUST_3082_PI443154341	6666666.414137.peg.3025
CUST_955_PI443154341	6666666.414137.peg.940
CUST_756_PI443154341	6666666.414137.peg.743
CUST_2238_PI443154341	6666666.414137.peg.2204
CUST_399_PI443154341	6666666.414137.peg.392
CUST_3416_PI443154341	6666666.414137.peg.3351
CUST_223_PI443154341	6666666.414137.peg.216
CUST_3258_PI443154341	6666666.414137.peg.3200
CUST_1931_PI443154341	6666666.414137.peg.1900
CUST_73_PI443154341	6666666.414137.peg.72
CUST_5954_PI443154341	6666666.414137.peg.5864
CUST_3924_PI443154341	6666666.414137.peg.3850
CUST_5916_PI443154341	6666666.414137.peg.5826
CUST_215_PI443154341	6666666.414137.peg.208
CUST_1709_PI443154341	6666666.414137.peg.1679
CUST_5127_PI443154341	6666666.414137.peg.5041
CUST_2077_PI443154341	6666666.414137.peg.2044
CUST_885_PI443154341	6666666.414137.peg.870
CUST_4188_PI443154341	6666666.414137.peg.4108
CUST_4304_PI443154341	6666666.414137.peg.4224
CUST_318_PI443154341	6666666.414137.peg.311
CUST_2795_PI443154341	6666666.414137.peg.2745
CUST_4225_PI443154341	6666666.414137.peg.4145
CUST_302_PI443154341	6666666.414137.peg.295
CUST_2840_PI443154341	6666666.414137.peg.2789
CUST_5854_PI443154341	6666666.414137.peg.5765
CUST_3844_PI443154341	6666666.414137.peg.3770
CUST_5848_PI443154341	6666666.414137.peg.5759
CUST_4274_PI443154341	6666666.414137.peg.4194
CUST_2481_PI443154341	6666666.414137.peg.2438
CUST_3836_PI443154341	6666666.414137.peg.3762
CUST_4408_PI443154341	6666666.414137.peg.4328
CUST_5637_PI443154341	6666666.414137.peg.5549
CUST_706_PI443154341	6666666.414137.peg.695
CUST_3143_PI443154341	6666666.414137.peg.3085
CUST_1912_PI443154341	6666666.414137.peg.1881
CUST_4936_PI443154341	6666666.414137.peg.4851
CUST_66_PI443154341	6666666.414137.peg.65
CUST_6021_PI443154341	6666666.414137.peg.5929
CUST_1701_PI443154341	6666666.414137.peg.1671
CUST_5452_PI443154341	6666666.414137.peg.5364
CUST_850_PI443154341	6666666.414137.peg.835
CUST_419_PI443154341	6666666.414137.peg.412
CUST_2259_PI443154341	6666666.414137.peg.2225
CUST_2809_PI443154341	6666666.414137.peg.2759
CUST_1962_PI443154341	6666666.414137.peg.1931
CUST_4150_PI443154341	6666666.414137.peg.4070
CUST_5693_PI443154341	6666666.414137.peg.5605
CUST_4032_PI443154341	6666666.414137.peg.3956
CUST_3146_PI443154341	6666666.414137.peg.3088
CUST_5223_PI443154341	6666666.414137.peg.5135
CUST_4111_PI443154341	6666666.414137.peg.4031
CUST_1888_PI443154341	6666666.414137.peg.1857
CUST_217_PI443154341	6666666.414137.peg.210
CUST_3947_PI443154341	6666666.414137.peg.3873
CUST_4014_PI443154341	6666666.414137.peg.3938
CUST_3254_PI443154341	6666666.414137.peg.3196
CUST_3532_PI443154341	6666666.414137.peg.3460
CUST_4253_PI443154341	6666666.414137.peg.4173
CUST_2763_PI443154341	6666666.414137.peg.2715
CUST_2176_PI443154341	6666666.414137.peg.2142
CUST_744_PI443154341	6666666.414137.peg.733
CUST_1632_PI443154341	6666666.414137.peg.1602
CUST_3683_PI443154341	6666666.414137.peg.3611
CUST_5269_PI443154341	6666666.414137.peg.5181
CUST_4107_PI443154341	6666666.414137.peg.4027
CUST_277_PI443154341	6666666.414137.peg.270
CUST_390_PI443154341	6666666.414137.peg.383
CUST_771_PI443154341	6666666.414137.peg.758
CUST_2432_PI443154341	6666666.414137.peg.2394
CUST_2114_PI443154341	6666666.414137.peg.2080
CUST_4673_PI443154341	6666666.414137.peg.4590
CUST_5073_PI443154341	6666666.414137.peg.4987
CUST_2034_PI443154341	6666666.414137.peg.2001
CUST_2073_PI443154341	6666666.414137.peg.2040
CUST_5358_PI443154341	6666666.414137.peg.5270
CUST_2198_PI443154341	6666666.414137.peg.2164
CUST_1640_PI443154341	6666666.414137.peg.1610
CUST_3790_PI443154341	6666666.414137.peg.3716
CUST_468_PI443154341	6666666.414137.peg.458
CUST_1048_PI443154341	6666666.414137.peg.1032
CUST_3743_PI443154341	6666666.414137.peg.3670
CUST_4883_PI443154341	6666666.414137.peg.4798
CUST_1742_PI443154341	6666666.414137.peg.1712
CUST_4839_PI443154341	6666666.414137.peg.4754
CUST_2777_PI443154341	6666666.414137.peg.2727
CUST_3502_PI443154341	6666666.414137.peg.3430
CUST_997_PI443154341	6666666.414137.peg.981
CUST_5607_PI443154341	6666666.414137.peg.5519
CUST_260_PI443154341	6666666.414137.peg.253
CUST_692_PI443154341	6666666.414137.peg.681
CUST_1264_PI443154341	6666666.414137.peg.1244
CUST_4577_PI443154341	6666666.414137.peg.4494
CUST_3949_PI443154341	6666666.414137.peg.3875
CUST_1001_PI443154341	6666666.414137.peg.985
CUST_1502_PI443154341	6666666.414137.peg.1479
CUST_4092_PI443154341	6666666.414137.peg.4012
CUST_4443_PI443154341	6666666.414137.peg.4362
CUST_2350_PI443154341	6666666.414137.peg.2315
CUST_4699_PI443154341	6666666.414137.peg.4616
CUST_1018_PI443154341	6666666.414137.peg.1002
CUST_5760_PI443154341	6666666.414137.peg.5671
CUST_3725_PI443154341	6666666.414137.peg.3652
CUST_297_PI443154341	6666666.414137.peg.290
CUST_3401_PI443154341	6666666.414137.peg.3336
CUST_5090_PI443154341	6666666.414137.peg.5004
CUST_5375_PI443154341	6666666.414137.peg.5287
CUST_3275_PI443154341	6666666.414137.peg.3217
CUST_4114_PI443154341	6666666.414137.peg.4034
CUST_5337_PI443154341	6666666.414137.peg.5249
CUST_2231_PI443154341	6666666.414137.peg.2197
CUST_1278_PI443154341	6666666.414137.peg.1258
CUST_2169_PI443154341	6666666.414137.peg.2135
CUST_3053_PI443154341	6666666.414137.peg.2997
CUST_3237_PI443154341	6666666.414137.peg.3179
CUST_1828_PI443154341	6666666.414137.peg.1797
CUST_2462_PI443154341	6666666.414137.peg.2419
CUST_2366_PI443154341	6666666.414137.peg.2331
CUST_3174_PI443154341	6666666.414137.peg.3116
CUST_3839_PI443154341	6666666.414137.peg.3765
CUST_400_PI443154341	6666666.414137.peg.393
CUST_5785_PI443154341	6666666.414137.peg.5696
CUST_670_PI443154341	6666666.414137.peg.659
CUST_5815_PI443154341	6666666.414137.peg.5726
CUST_205_PI443154341	6666666.414137.peg.201
CUST_4866_PI443154341	6666666.414137.peg.4781
CUST_1797_PI443154341	6666666.414137.peg.1766
CUST_2197_PI443154341	6666666.414137.peg.2163
CUST_2699_PI443154341	6666666.414137.peg.2652
CUST_2572_PI443154341	6666666.414137.peg.2527
CUST_2188_PI443154341	6666666.414137.peg.2154
CUST_5722_PI443154341	6666666.414137.peg.5634
CUST_3506_PI443154341	6666666.414137.peg.3434
CUST_3964_PI443154341	6666666.414137.peg.3889
CUST_2354_PI443154341	6666666.414137.peg.2319
CUST_5126_PI443154341	6666666.414137.peg.5040
CUST_2482_PI443154341	6666666.414137.peg.2439
CUST_2826_PI443154341	6666666.414137.peg.2775
CUST_2163_PI443154341	6666666.414137.peg.2129
CUST_3344_PI443154341	6666666.414137.peg.3281
CUST_4155_PI443154341	6666666.414137.peg.4075
CUST_1430_PI443154341	6666666.414137.peg.1409
CUST_1542_PI443154341	6666666.414137.peg.1514
CUST_5141_PI443154341	6666666.414137.peg.5054
CUST_5678_PI443154341	6666666.414137.peg.5590
CUST_998_PI443154341	6666666.414137.peg.982
CUST_3111_PI443154341	6666666.414137.peg.3053
CUST_122_PI443154341	6666666.414137.peg.119
CUST_2227_PI443154341	6666666.414137.peg.2193
CUST_3880_PI443154341	6666666.414137.peg.3806
CUST_2411_PI443154341	6666666.414137.peg.2373
CUST_5243_PI443154341	6666666.414137.peg.5155
CUST_1028_PI443154341	6666666.414137.peg.1012
CUST_3271_PI443154341	6666666.414137.peg.3213
CUST_1138_PI443154341	6666666.414137.rna.10
CUST_5251_PI443154341	6666666.414137.peg.5163
CUST_1509_PI443154341	6666666.414137.rna.15
CUST_1371_PI443154341	6666666.414137.peg.1351
CUST_3079_PI443154341	6666666.414137.peg.3023
CUST_3897_PI443154341	6666666.414137.peg.3823
CUST_1339_PI443154341	6666666.414137.peg.1319
CUST_822_PI443154341	6666666.414137.peg.809
CUST_5702_PI443154341	6666666.414137.peg.5614
CUST_2067_PI443154341	6666666.414137.peg.2034
CUST_1579_PI443154341	6666666.414137.peg.1551
CUST_1940_PI443154341	6666666.414137.peg.1909
CUST_4801_PI443154341	6666666.414137.peg.4716
CUST_5477_PI443154341	6666666.414137.peg.5389
CUST_444_PI443154341	6666666.414137.peg.434
CUST_1260_PI443154341	6666666.414137.peg.1240
CUST_4746_PI443154341	6666666.414137.peg.4663
CUST_2000_PI443154341	6666666.414137.peg.1968
CUST_650_PI443154341	6666666.414137.peg.639
CUST_3861_PI443154341	6666666.414137.peg.3787
CUST_2309_PI443154341	6666666.414137.peg.2274
CUST_5863_PI443154341	6666666.414137.peg.5774
CUST_3449_PI443154341	6666666.414137.peg.3382
CUST_2829_PI443154341	6666666.414137.peg.2778
CUST_1576_PI443154341	6666666.414137.peg.1548
CUST_916_PI443154341	6666666.414137.peg.901
CUST_3975_PI443154341	6666666.414137.peg.3899
CUST_3443_PI443154341	6666666.414137.peg.3376
CUST_2845_PI443154341	6666666.414137.peg.2794
CUST_49_PI443154341	6666666.414137.peg.48
CUST_4579_PI443154341	6666666.414137.peg.4496
CUST_3766_PI443154341	6666666.414137.peg.3692
CUST_1584_PI443154341	6666666.414137.peg.1556
CUST_3817_PI443154341	6666666.414137.peg.3743
CUST_2974_PI443154341	6666666.414137.peg.2922
CUST_2140_PI443154341	6666666.414137.peg.2106
CUST_3534_PI443154341	6666666.414137.peg.3462
CUST_3224_PI443154341	6666666.414137.peg.3166
CUST_5775_PI443154341	6666666.414137.peg.5686
CUST_1574_PI443154341	6666666.414137.peg.1546
CUST_1097_PI443154341	6666666.414137.peg.1080
CUST_1005_PI443154341	6666666.414137.peg.989
CUST_1259_PI443154341	6666666.414137.peg.1239
CUST_2939_PI443154341	6666666.414137.peg.2887
CUST_1199_PI443154341	6666666.414137.peg.1180
CUST_1376_PI443154341	6666666.414137.peg.1356
CUST_271_PI443154341	6666666.414137.peg.264
CUST_3362_PI443154341	6666666.414137.peg.3298
CUST_1656_PI443154341	6666666.414137.peg.1626
CUST_4924_PI443154341	6666666.414137.peg.4839
CUST_368_PI443154341	6666666.414137.peg.361
CUST_4224_PI443154341	6666666.414137.peg.4144
CUST_4327_PI443154341	6666666.414137.peg.4247
CUST_841_PI443154341	6666666.414137.peg.826
CUST_4363_PI443154341	6666666.414137.peg.4283
CUST_3129_PI443154341	6666666.414137.peg.3071
CUST_2653_PI443154341	6666666.414137.peg.2609
CUST_5599_PI443154341	6666666.414137.peg.5511
CUST_4566_PI443154341	6666666.414137.peg.4483
CUST_4621_PI443154341	6666666.414137.peg.4538
CUST_3992_PI443154341	6666666.414137.peg.3916
CUST_1950_PI443154341	6666666.414137.peg.1919
CUST_5446_PI443154341	6666666.414137.peg.5358
CUST_5448_PI443154341	6666666.414137.peg.5360
CUST_4576_PI443154341	6666666.414137.peg.4493
CUST_3225_PI443154341	6666666.414137.peg.3167
CUST_1196_PI443154341	6666666.414137.peg.1177
CUST_5013_PI443154341	6666666.414137.peg.4928
CUST_2834_PI443154341	6666666.414137.peg.2783
CUST_4575_PI443154341	6666666.414137.peg.4492
CUST_56_PI443154341	6666666.414137.peg.55
CUST_882_PI443154341	6666666.414137.peg.867
CUST_3744_PI443154341	6666666.414137.peg.3671
CUST_5468_PI443154341	6666666.414137.peg.5380
CUST_740_PI443154341	6666666.414137.peg.729
CUST_2187_PI443154341	6666666.414137.peg.2153
CUST_1938_PI443154341	6666666.414137.peg.1907
CUST_521_PI443154341	6666666.414137.peg.511
CUST_5414_PI443154341	6666666.414137.peg.5326
CUST_2147_PI443154341	6666666.414137.peg.2113
CUST_235_PI443154341	6666666.414137.peg.228
CUST_4728_PI443154341	6666666.414137.peg.4645
CUST_3560_PI443154341	6666666.414137.peg.3488
CUST_385_PI443154341	6666666.414137.peg.378
CUST_2492_PI443154341	6666666.414137.peg.2449
CUST_1870_PI443154341	6666666.414137.peg.1839
CUST_1356_PI443154341	6666666.414137.peg.1336
CUST_3291_PI443154341	6666666.414137.peg.3233
CUST_3350_PI443154341	6666666.414137.peg.3286
CUST_1922_PI443154341	6666666.414137.peg.1891
CUST_647_PI443154341	6666666.414137.peg.636
CUST_4004_PI443154341	6666666.414137.peg.3928
CUST_4220_PI443154341	6666666.414137.peg.4140
CUST_3046_PI443154341	6666666.414137.peg.2990
CUST_2831_PI443154341	6666666.414137.peg.2780
CUST_3923_PI443154341	6666666.414137.peg.3849
CUST_4899_PI443154341	6666666.414137.peg.4814
CUST_2569_PI443154341	6666666.414137.peg.2524
CUST_330_PI443154341	6666666.414137.peg.323
CUST_4960_PI443154341	6666666.414137.peg.4875
CUST_1774_PI443154341	6666666.414137.peg.1743
CUST_4543_PI443154341	6666666.414137.peg.4460
CUST_1586_PI443154341	6666666.414137.peg.1558
CUST_2605_PI443154341	6666666.414137.peg.2560
CUST_4362_PI443154341	6666666.414137.peg.4282
CUST_3799_PI443154341	6666666.414137.peg.3725
CUST_5280_PI443154341	6666666.414137.peg.5192
CUST_3549_PI443154341	6666666.414137.peg.3477
CUST_3512_PI443154341	6666666.414137.peg.3440
CUST_2860_PI443154341	6666666.414137.peg.2809
CUST_3165_PI443154341	6666666.414137.peg.3107
CUST_1955_PI443154341	6666666.414137.peg.1924
CUST_3331_PI443154341	6666666.414137.peg.3268
CUST_820_PI443154341	6666666.414137.peg.807
CUST_3846_PI443154341	6666666.414137.peg.3772
CUST_2233_PI443154341	6666666.414137.peg.2199
CUST_3340_PI443154341	6666666.414137.peg.3277
CUST_2215_PI443154341	6666666.414137.peg.2181
CUST_81_PI443154341	6666666.414137.peg.80
CUST_4627_PI443154341	6666666.414137.peg.4544
CUST_3765_PI443154341	6666666.414137.peg.3691
CUST_2234_PI443154341	6666666.414137.peg.2200
CUST_2832_PI443154341	6666666.414137.peg.2781
CUST_5958_PI443154341	6666666.414137.peg.5868
CUST_3852_PI443154341	6666666.414137.peg.3778
CUST_5688_PI443154341	6666666.414137.peg.5600
CUST_4171_PI443154341	6666666.414137.peg.4091
CUST_5322_PI443154341	6666666.414137.peg.5234
CUST_312_PI443154341	6666666.414137.peg.305
CUST_483_PI443154341	6666666.414137.peg.473
CUST_1374_PI443154341	6666666.414137.peg.1354
CUST_699_PI443154341	6666666.414137.peg.688
CUST_1592_PI443154341	6666666.414137.peg.1564
CUST_695_PI443154341	6666666.414137.peg.684
CUST_298_PI443154341	6666666.414137.peg.291
CUST_3698_PI443154341	6666666.414137.rna.46
CUST_578_PI443154341	6666666.414137.peg.568
CUST_1610_PI443154341	6666666.414137.peg.1582
CUST_5860_PI443154341	6666666.414137.peg.5771
CUST_261_PI443154341	6666666.414137.peg.254
CUST_3676_PI443154341	6666666.414137.peg.3604
CUST_2247_PI443154341	6666666.414137.peg.2213
CUST_3186_PI443154341	6666666.414137.peg.3128
CUST_1712_PI443154341	6666666.414137.peg.1682
CUST_1074_PI443154341	6666666.414137.peg.1058
CUST_2905_PI443154341	6666666.414137.peg.2854
CUST_469_PI443154341	6666666.414137.peg.459
CUST_2752_PI443154341	6666666.414137.peg.2704
CUST_3935_PI443154341	6666666.414137.peg.3861
CUST_4356_PI443154341	6666666.414137.peg.4276
CUST_5285_PI443154341	6666666.414137.peg.5197
CUST_4172_PI443154341	6666666.414137.peg.4092
CUST_3442_PI443154341	6666666.414137.peg.3375
CUST_1890_PI443154341	6666666.414137.peg.1859
CUST_395_PI443154341	6666666.414137.peg.388
CUST_4830_PI443154341	6666666.414137.peg.4745
CUST_2723_PI443154341	6666666.414137.peg.2675
CUST_2264_PI443154341	6666666.414137.peg.2230
CUST_5913_PI443154341	6666666.414137.peg.5823
CUST_5779_PI443154341	6666666.414137.peg.5690
CUST_4483_PI443154341	6666666.414137.peg.4402
CUST_16_PI443154341	6666666.414137.peg.15
CUST_5837_PI443154341	6666666.414137.peg.5748
CUST_1241_PI443154341	6666666.414137.peg.1222
CUST_3807_PI443154341	6666666.414137.peg.3733
CUST_3459_PI443154341	6666666.414137.peg.3391
CUST_3483_PI443154341	6666666.414137.peg.3411
CUST_177_PI443154341	6666666.414137.peg.173
CUST_5052_PI443154341	6666666.414137.peg.4967
CUST_2945_PI443154341	6666666.414137.peg.2893
CUST_4105_PI443154341	6666666.414137.peg.4025
CUST_2550_PI443154341	6666666.414137.peg.2506
CUST_2099_PI443154341	6666666.414137.peg.2066
CUST_1215_PI443154341	6666666.414137.peg.1196
CUST_739_PI443154341	6666666.414137.peg.728
CUST_3012_PI443154341	6666666.414137.peg.2957
CUST_3017_PI443154341	6666666.414137.peg.2962
CUST_110_PI443154341	6666666.414137.peg.107
CUST_4818_PI443154341	6666666.414137.peg.4733
CUST_1945_PI443154341	6666666.414137.peg.1914
CUST_3885_PI443154341	6666666.414137.peg.3811
CUST_876_PI443154341	6666666.414137.peg.861
CUST_212_PI443154341	6666666.414137.peg.207
CUST_4537_PI443154341	6666666.414137.peg.4454
CUST_5570_PI443154341	6666666.414137.peg.5482
CUST_4640_PI443154341	6666666.414137.peg.4557
CUST_968_PI443154341	6666666.414137.peg.953
CUST_3931_PI443154341	6666666.414137.peg.3857
CUST_2977_PI443154341	6666666.414137.peg.2925
CUST_5252_PI443154341	6666666.414137.peg.5164
CUST_256_PI443154341	6666666.414137.peg.249
CUST_1788_PI443154341	6666666.414137.peg.1757
CUST_4881_PI443154341	6666666.414137.peg.4796
CUST_3528_PI443154341	6666666.414137.peg.3456
CUST_806_PI443154341	6666666.414137.peg.793
CUST_4664_PI443154341	6666666.414137.peg.4581
CUST_1738_PI443154341	6666666.414137.peg.1708
CUST_661_PI443154341	6666666.414137.peg.650
CUST_5024_PI443154341	6666666.414137.peg.4939
CUST_2612_PI443154341	6666666.414137.peg.2567
CUST_4569_PI443154341	6666666.414137.peg.4486
CUST_5488_PI443154341	6666666.414137.peg.5400
CUST_874_PI443154341	6666666.414137.peg.859
CUST_2487_PI443154341	6666666.414137.peg.2444
CUST_388_PI443154341	6666666.414137.peg.381
CUST_3792_PI443154341	6666666.414137.peg.3718
CUST_309_PI443154341	6666666.414137.peg.302
CUST_3403_PI443154341	6666666.414137.peg.3338
CUST_5791_PI443154341	6666666.414137.peg.5702
CUST_726_PI443154341	6666666.414137.peg.715
CUST_1445_PI443154341	6666666.414137.rna.11
CUST_5290_PI443154341	6666666.414137.peg.5202
CUST_1451_PI443154341	6666666.414137.peg.1428
CUST_5267_PI443154341	6666666.414137.peg.5179
CUST_482_PI443154341	6666666.414137.peg.472
CUST_1043_PI443154341	6666666.414137.peg.1027
CUST_2844_PI443154341	6666666.414137.peg.2793
CUST_137_PI443154341	6666666.414137.peg.133
CUST_787_PI443154341	6666666.414137.peg.774
CUST_2936_PI443154341	6666666.414137.peg.2884
CUST_5336_PI443154341	6666666.414137.peg.5248
CUST_5869_PI443154341	6666666.414137.peg.5780
CUST_5170_PI443154341	6666666.414137.peg.5082
CUST_3089_PI443154341	6666666.414137.peg.3032
CUST_23_PI443154341	6666666.414137.peg.22
CUST_4387_PI443154341	6666666.414137.peg.4307
CUST_1326_PI443154341	6666666.414137.peg.1306
CUST_3796_PI443154341	6666666.414137.peg.3722
CUST_465_PI443154341	6666666.414137.peg.455
CUST_3288_PI443154341	6666666.414137.peg.3230
CUST_3747_PI443154341	6666666.414137.peg.3674
CUST_3711_PI443154341	6666666.414137.peg.3638
CUST_5502_PI443154341	6666666.414137.peg.5414
CUST_2348_PI443154341	6666666.414137.peg.2313
CUST_3621_PI443154341	6666666.414137.peg.3549
CUST_5324_PI443154341	6666666.414137.peg.5236
CUST_1441_PI443154341	6666666.414137.peg.1420
CUST_4649_PI443154341	6666666.414137.peg.4566
CUST_4775_PI443154341	6666666.414137.peg.4690
CUST_3612_PI443154341	6666666.414137.peg.3540
CUST_3342_PI443154341	6666666.414137.peg.3279
CUST_336_PI443154341	6666666.414137.peg.329
CUST_3469_PI443154341	6666666.414137.peg.3401
CUST_2571_PI443154341	6666666.414137.peg.2526
CUST_5391_PI443154341	6666666.414137.peg.5303
CUST_4024_PI443154341	6666666.414137.peg.3948
CUST_1223_PI443154341	6666666.414137.peg.1204
CUST_2577_PI443154341	6666666.414137.peg.2532
CUST_1655_PI443154341	6666666.414137.peg.1625
CUST_942_PI443154341	6666666.414137.peg.927
CUST_1304_PI443154341	6666666.414137.peg.1284
CUST_3579_PI443154341	6666666.414137.peg.3507
CUST_2532_PI443154341	6666666.414137.peg.2488
CUST_619_PI443154341	6666666.414137.peg.609
CUST_4280_PI443154341	6666666.414137.peg.4200
CUST_4319_PI443154341	6666666.414137.peg.4239
CUST_4204_PI443154341	6666666.414137.peg.4124
CUST_1959_PI443154341	6666666.414137.peg.1928
CUST_2208_PI443154341	6666666.414137.peg.2174
CUST_5480_PI443154341	6666666.414137.peg.5392
CUST_660_PI443154341	6666666.414137.peg.649
CUST_2251_PI443154341	6666666.414137.peg.2217
CUST_2757_PI443154341	6666666.414137.peg.2709
CUST_60_PI443154341	6666666.414137.peg.59
CUST_5939_PI443154341	6666666.414137.peg.5849
CUST_3051_PI443154341	6666666.414137.peg.2995
CUST_1039_PI443154341	6666666.414137.peg.1023
CUST_3235_PI443154341	6666666.414137.peg.3177
CUST_4_PI443154341	6666666.414137.peg.3
CUST_2645_PI443154341	6666666.414137.peg.2601
CUST_2389_PI443154341	6666666.414137.peg.2352
CUST_2276_PI443154341	6666666.414137.peg.2242
CUST_1864_PI443154341	6666666.414137.peg.1833
CUST_2861_PI443154341	6666666.414137.peg.2810
CUST_5507_PI443154341	6666666.414137.peg.5419
CUST_4734_PI443154341	6666666.414137.peg.4651
CUST_600_PI443154341	6666666.414137.peg.590
CUST_3823_PI443154341	6666666.414137.peg.3749
CUST_957_PI443154341	6666666.414137.peg.942
CUST_2156_PI443154341	6666666.414137.peg.2122
CUST_167_PI443154341	6666666.414137.peg.163
CUST_1403_PI443154341	6666666.414137.peg.1382
CUST_2106_PI443154341	6666666.414137.peg.2072
CUST_314_PI443154341	6666666.414137.peg.307
CUST_1058_PI443154341	6666666.414137.peg.1042
CUST_1325_PI443154341	6666666.414137.peg.1305
CUST_2145_PI443154341	6666666.414137.peg.2111
CUST_396_PI443154341	6666666.414137.peg.389
CUST_3595_PI443154341	6666666.414137.peg.3523
CUST_2358_PI443154341	6666666.414137.peg.2323
CUST_149_PI443154341	6666666.414137.peg.145
CUST_5354_PI443154341	6666666.414137.peg.5266
CUST_711_PI443154341	6666666.414137.peg.700
CUST_4234_PI443154341	6666666.414137.peg.4154
CUST_607_PI443154341	6666666.414137.peg.597
CUST_5075_PI443154341	6666666.414137.peg.4989
CUST_4521_PI443154341	6666666.414137.peg.4438
CUST_4915_PI443154341	6666666.414137.peg.4830
CUST_3899_PI443154341	6666666.414137.peg.3825
CUST_872_PI443154341	6666666.414137.peg.857
CUST_5940_PI443154341	6666666.414137.peg.5850
CUST_4029_PI443154341	6666666.414137.peg.3953
CUST_5260_PI443154341	6666666.414137.peg.5172
CUST_3305_PI443154341	6666666.414137.peg.3247
CUST_536_PI443154341	6666666.414137.peg.526
CUST_4670_PI443154341	6666666.414137.peg.4587
CUST_112_PI443154341	6666666.414137.peg.109
CUST_1225_PI443154341	6666666.414137.peg.1206
CUST_1240_PI443154341	6666666.414137.peg.1221
CUST_5305_PI443154341	6666666.414137.peg.5217
CUST_4798_PI443154341	6666666.414137.peg.4713
CUST_2433_PI443154341	6666666.414137.peg.2395
CUST_3866_PI443154341	6666666.414137.peg.3792
CUST_4756_PI443154341	6666666.414137.repeat.40
CUST_3995_PI443154341	6666666.414137.peg.3919
CUST_775_PI443154341	6666666.414137.peg.762
CUST_4927_PI443154341	6666666.414137.peg.4842
CUST_2712_PI443154341	6666666.414137.peg.2665
CUST_1608_PI443154341	6666666.414137.peg.1580
CUST_1719_PI443154341	6666666.414137.peg.1689
CUST_4669_PI443154341	6666666.414137.peg.4586
CUST_3398_PI443154341	6666666.414137.peg.3333
CUST_4981_PI443154341	6666666.414137.peg.4896
CUST_4808_PI443154341	6666666.414137.peg.4723
CUST_5698_PI443154341	6666666.414137.peg.5610
CUST_3802_PI443154341	6666666.414137.peg.3728
CUST_1216_PI443154341	6666666.414137.peg.1197
CUST_416_PI443154341	6666666.414137.peg.409
CUST_553_PI443154341	6666666.414137.peg.543
CUST_1697_PI443154341	6666666.414137.peg.1667
CUST_91_PI443154341	6666666.414137.peg.89
CUST_4000_PI443154341	6666666.414137.peg.3924
CUST_1840_PI443154341	6666666.414137.peg.1809
CUST_1575_PI443154341	6666666.414137.peg.1547
CUST_1334_PI443154341	6666666.414137.peg.1314
CUST_4917_PI443154341	6666666.414137.peg.4832
CUST_3349_PI443154341	6666666.414137.peg.3285
CUST_526_PI443154341	6666666.414137.peg.516
CUST_375_PI443154341	6666666.414137.peg.368
CUST_5946_PI443154341	6666666.414137.peg.5856
CUST_5663_PI443154341	6666666.414137.peg.5575
CUST_5150_PI443154341	6666666.414137.repeat.43
CUST_4469_PI443154341	6666666.414137.peg.4388
CUST_3831_PI443154341	6666666.414137.peg.3757
CUST_1439_PI443154341	6666666.414137.peg.1418
CUST_2263_PI443154341	6666666.414137.peg.2229
CUST_5311_PI443154341	6666666.414137.peg.5223
CUST_5254_PI443154341	6666666.414137.peg.5166
CUST_5088_PI443154341	6666666.414137.peg.5002
CUST_3568_PI443154341	6666666.414137.peg.3496
CUST_1833_PI443154341	6666666.414137.peg.1802
CUST_3220_PI443154341	6666666.414137.peg.3162
CUST_632_PI443154341	6666666.414137.rna.6
CUST_3957_PI443154341	6666666.414137.peg.3883
CUST_1204_PI443154341	6666666.414137.peg.1185
CUST_5087_PI443154341	6666666.414137.peg.5001
CUST_4059_PI443154341	6666666.414137.peg.3983
CUST_2611_PI443154341	6666666.414137.peg.2566
CUST_82_PI443154341	6666666.414137.peg.81
CUST_3891_PI443154341	6666666.414137.peg.3817
CUST_3269_PI443154341	6666666.414137.peg.3211
CUST_3968_PI443154341	6666666.414137.peg.3893
CUST_1262_PI443154341	6666666.414137.peg.1242
CUST_3080_PI443154341	6666666.414137.peg.3024
CUST_4138_PI443154341	6666666.414137.peg.4058
CUST_662_PI443154341	6666666.414137.peg.651
CUST_5003_PI443154341	6666666.414137.peg.4918
CUST_2412_PI443154341	6666666.414137.peg.2374
CUST_3313_PI443154341	6666666.414137.peg.3251
CUST_5923_PI443154341	6666666.414137.peg.5833
CUST_5576_PI443154341	6666666.414137.peg.5488
CUST_5222_PI443154341	6666666.414137.peg.5134
CUST_5057_PI443154341	6666666.414137.peg.4972
CUST_5389_PI443154341	6666666.414137.peg.5301
CUST_2691_PI443154341	6666666.414137.peg.2644
CUST_2973_PI443154341	6666666.414137.peg.2921
CUST_1185_PI443154341	6666666.414137.peg.1166
CUST_4516_PI443154341	6666666.414137.peg.4433
CUST_4313_PI443154341	6666666.414137.peg.4233
CUST_5788_PI443154341	6666666.414137.peg.5699
CUST_733_PI443154341	6666666.414137.peg.722
CUST_3624_PI443154341	6666666.414137.peg.3552
CUST_2544_PI443154341	6666666.414137.peg.2500
CUST_5535_PI443154341	6666666.414137.peg.5447
CUST_1895_PI443154341	6666666.414137.peg.1864
CUST_4190_PI443154341	6666666.414137.peg.4110
CUST_608_PI443154341	6666666.414137.peg.598
CUST_2854_PI443154341	6666666.414137.peg.2803
CUST_4732_PI443154341	6666666.414137.peg.4649
CUST_3668_PI443154341	6666666.414137.peg.3596
CUST_2874_PI443154341	6666666.414137.peg.2823
CUST_2665_PI443154341	6666666.414137.peg.2620
CUST_5224_PI443154341	6666666.414137.peg.5136
CUST_2997_PI443154341	6666666.414137.peg.2945
CUST_4894_PI443154341	6666666.414137.peg.4809
CUST_5827_PI443154341	6666666.414137.peg.5738
CUST_4410_PI443154341	6666666.414137.peg.4330
CUST_3320_PI443154341	6666666.414137.peg.3257
CUST_2930_PI443154341	6666666.414137.peg.2878
CUST_1969_PI443154341	6666666.414137.peg.1938
CUST_151_PI443154341	6666666.414137.peg.147
CUST_2226_PI443154341	6666666.414137.peg.2192
CUST_1154_PI443154341	6666666.414137.peg.1135
CUST_5299_PI443154341	6666666.414137.peg.5211
CUST_5461_PI443154341	6666666.414137.peg.5373
CUST_2559_PI443154341	6666666.414137.peg.2515
CUST_4504_PI443154341	6666666.414137.rna.56
CUST_4494_PI443154341	6666666.414137.peg.4412
CUST_4119_PI443154341	6666666.414137.peg.4039
CUST_1162_PI443154341	6666666.414137.peg.1143
CUST_4860_PI443154341	6666666.414137.peg.4775
CUST_5639_PI443154341	6666666.414137.peg.5551
CUST_3821_PI443154341	6666666.414137.peg.3747
CUST_3644_PI443154341	6666666.414137.peg.3572
CUST_1968_PI443154341	6666666.414137.peg.1937
CUST_671_PI443154341	6666666.414137.peg.660
CUST_1302_PI443154341	6666666.414137.peg.1282
CUST_3016_PI443154341	6666666.414137.peg.2961
CUST_5138_PI443154341	6666666.414137.peg.5052
CUST_3117_PI443154341	6666666.414137.peg.3059
CUST_596_PI443154341	6666666.414137.peg.586
CUST_514_PI443154341	6666666.414137.peg.504
CUST_5761_PI443154341	6666666.414137.peg.5672
CUST_1323_PI443154341	6666666.414137.peg.1303
CUST_2210_PI443154341	6666666.414137.peg.2176
CUST_3057_PI443154341	6666666.414137.peg.3001
CUST_3306_PI443154341	6666666.414137.repeat.26
CUST_1613_PI443154341	6666666.414137.peg.1585
CUST_145_PI443154341	6666666.414137.peg.141
CUST_3901_PI443154341	6666666.414137.peg.3827
CUST_289_PI443154341	6666666.414137.peg.282
CUST_823_PI443154341	6666666.414137.peg.810
CUST_5784_PI443154341	6666666.414137.peg.5695
CUST_4910_PI443154341	6666666.414137.peg.4825
CUST_4131_PI443154341	6666666.414137.peg.4051
CUST_4935_PI443154341	6666666.414137.peg.4850
CUST_4763_PI443154341	6666666.414137.peg.4678
CUST_219_PI443154341	6666666.414137.peg.212
CUST_1682_PI443154341	6666666.414137.peg.1652
CUST_4754_PI443154341	6666666.414137.peg.4671
CUST_3735_PI443154341	6666666.414137.peg.3662
CUST_2986_PI443154341	6666666.414137.peg.2934
CUST_5529_PI443154341	6666666.414137.peg.5441
CUST_1169_PI443154341	6666666.414137.peg.1150
CUST_1176_PI443154341	6666666.414137.peg.1157
CUST_1920_PI443154341	6666666.414137.peg.1889
CUST_2750_PI443154341	6666666.414137.peg.2702
CUST_1556_PI443154341	6666666.414137.peg.1528
CUST_1541_PI443154341	6666666.414137.peg.1513
CUST_5935_PI443154341	6666666.414137.peg.5845
CUST_5652_PI443154341	6666666.414137.peg.5564
CUST_4979_PI443154341	6666666.414137.peg.4894
CUST_915_PI443154341	6666666.414137.peg.900
CUST_3908_PI443154341	6666666.414137.peg.3834
CUST_4087_PI443154341	6666666.414137.rna.48
CUST_4729_PI443154341	6666666.414137.peg.4646
CUST_3508_PI443154341	6666666.414137.peg.3436
CUST_3896_PI443154341	6666666.414137.peg.3822
CUST_5368_PI443154341	6666666.414137.peg.5280
CUST_838_PI443154341	6666666.414137.peg.823
CUST_3273_PI443154341	6666666.414137.peg.3215
CUST_544_PI443154341	6666666.414137.peg.534
CUST_1849_PI443154341	6666666.414137.peg.1818
CUST_1928_PI443154341	6666666.414137.peg.1897
CUST_2471_PI443154341	6666666.414137.peg.2428
CUST_1996_PI443154341	6666666.414137.peg.1964
CUST_2679_PI443154341	6666666.414137.peg.2632
CUST_1407_PI443154341	6666666.414137.peg.1386
CUST_4113_PI443154341	6666666.414137.peg.4033
CUST_2477_PI443154341	6666666.414137.peg.2434
CUST_1372_PI443154341	6666666.414137.peg.1352
CUST_5441_PI443154341	6666666.414137.peg.5353
CUST_4533_PI443154341	6666666.414137.peg.4450
CUST_1230_PI443154341	6666666.414137.peg.1211
CUST_2687_PI443154341	6666666.414137.peg.2640
CUST_2720_PI443154341	6666666.414137.peg.2672
CUST_1482_PI443154341	6666666.414137.peg.1459
CUST_4080_PI443154341	6666666.414137.peg.4003
CUST_3941_PI443154341	6666666.414137.peg.3867
CUST_2050_PI443154341	6666666.414137.peg.2017
CUST_4963_PI443154341	6666666.414137.peg.4878
CUST_4788_PI443154341	6666666.414137.peg.4703
CUST_1390_PI443154341	6666666.414137.peg.1369
CUST_1525_PI443154341	6666666.414137.peg.1497
CUST_3185_PI443154341	6666666.414137.peg.3127
CUST_195_PI443154341	6666666.414137.peg.191
CUST_5894_PI443154341	6666666.414137.peg.5804
CUST_2778_PI443154341	6666666.414137.peg.2728
CUST_4200_PI443154341	6666666.414137.peg.4120
CUST_3155_PI443154341	6666666.414137.peg.3097
CUST_3162_PI443154341	6666666.414137.peg.3104
CUST_3286_PI443154341	6666666.414137.peg.3228
CUST_3887_PI443154341	6666666.414137.peg.3813
CUST_3937_PI443154341	6666666.414137.peg.3863
CUST_2199_PI443154341	6666666.414137.peg.2165
CUST_5733_PI443154341	6666666.414137.peg.5645
CUST_5866_PI443154341	6666666.414137.peg.5777
CUST_2910_PI443154341	6666666.414137.peg.2859
CUST_1179_PI443154341	6666666.414137.peg.1160
CUST_1844_PI443154341	6666666.414137.peg.1813
CUST_430_PI443154341	6666666.414137.crispr_array.1
CUST_3300_PI443154341	6666666.414137.peg.3242
CUST_1633_PI443154341	6666666.414137.peg.1603
CUST_4348_PI443154341	6666666.414137.peg.4268
CUST_5282_PI443154341	6666666.414137.peg.5194
CUST_1228_PI443154341	6666666.414137.peg.1209
CUST_1019_PI443154341	6666666.414137.peg.1003
CUST_3538_PI443154341	6666666.414137.peg.3466
CUST_1573_PI443154341	6666666.414137.peg.1545
CUST_1563_PI443154341	6666666.414137.peg.1535
CUST_3453_PI443154341	6666666.414137.peg.3386
CUST_5552_PI443154341	6666666.414137.peg.5464
CUST_676_PI443154341	6666666.414137.peg.665
CUST_1873_PI443154341	6666666.414137.peg.1842
CUST_227_PI443154341	6666666.414137.peg.220
CUST_2313_PI443154341	6666666.414137.peg.2278
CUST_5897_PI443154341	6666666.414137.peg.5807
CUST_4582_PI443154341	6666666.414137.peg.4499
CUST_3481_PI443154341	6666666.414137.peg.3409
CUST_1668_PI443154341	6666666.414137.peg.1638
CUST_1587_PI443154341	6666666.414137.peg.1559
CUST_4018_PI443154341	6666666.414137.peg.3942
CUST_527_PI443154341	6666666.414137.peg.517
CUST_2464_PI443154341	6666666.414137.peg.2421
CUST_5970_PI443154341	6666666.414137.peg.5879
CUST_1946_PI443154341	6666666.414137.peg.1915
CUST_3479_PI443154341	6666666.414137.repeat.34
CUST_4948_PI443154341	6666666.414137.peg.4863
CUST_4824_PI443154341	6666666.414137.peg.4739
CUST_623_PI443154341	6666666.414137.peg.613
CUST_4722_PI443154341	6666666.414137.peg.4639
CUST_89_PI443154341	6666666.414137.peg.87
CUST_5427_PI443154341	6666666.414137.peg.5339
CUST_1366_PI443154341	6666666.414137.peg.1346
CUST_1695_PI443154341	6666666.414137.peg.1665
CUST_637_PI443154341	6666666.414137.peg.626
CUST_4243_PI443154341	6666666.414137.peg.4163
CUST_5428_PI443154341	6666666.414137.peg.5340
CUST_1419_PI443154341	6666666.414137.peg.1398
CUST_1748_PI443154341	6666666.414137.peg.1718
CUST_4684_PI443154341	6666666.414137.peg.4601
CUST_4812_PI443154341	6666666.414137.peg.4727
CUST_470_PI443154341	6666666.414137.peg.460
CUST_4869_PI443154341	6666666.414137.peg.4784
CUST_4897_PI443154341	6666666.414137.peg.4812
CUST_4574_PI443154341	6666666.414137.peg.4491
CUST_4042_PI443154341	6666666.414137.peg.3966
CUST_426_PI443154341	6666666.414137.peg.419
CUST_1983_PI443154341	6666666.414137.peg.1952
CUST_4115_PI443154341	6666666.414137.peg.4035
CUST_3499_PI443154341	6666666.414137.peg.3427
CUST_2027_PI443154341	6666666.414137.peg.1994
CUST_5231_PI443154341	6666666.414137.peg.5143
CUST_1757_PI443154341	6666666.414137.peg.1727
CUST_4962_PI443154341	6666666.414137.peg.4877
CUST_301_PI443154341	6666666.414137.peg.294
CUST_3776_PI443154341	6666666.414137.peg.3702
CUST_2929_PI443154341	6666666.414137.peg.2877
CUST_5846_PI443154341	6666666.414137.peg.5757
CUST_826_PI443154341	6666666.414137.peg.813
CUST_2090_PI443154341	6666666.414137.peg.2057
CUST_3383_PI443154341	6666666.414137.peg.3319
CUST_4431_PI443154341	6666666.414137.peg.4351
CUST_541_PI443154341	6666666.414137.peg.531
CUST_694_PI443154341	6666666.414137.peg.683
CUST_2849_PI443154341	6666666.414137.peg.2798
CUST_1467_PI443154341	6666666.414137.peg.1444
CUST_3760_PI443154341	6666666.414137.peg.3686
CUST_5068_PI443154341	6666666.414137.peg.4982
CUST_357_PI443154341	6666666.414137.peg.350
CUST_2585_PI443154341	6666666.414137.peg.2540
CUST_5371_PI443154341	6666666.414137.peg.5283
CUST_5119_PI443154341	6666666.414137.peg.5033
CUST_3341_PI443154341	6666666.414137.peg.3278
CUST_5157_PI443154341	6666666.414137.peg.5069
CUST_4034_PI443154341	6666666.414137.peg.3958
CUST_5700_PI443154341	6666666.414137.peg.5612
CUST_2407_PI443154341	6666666.414137.peg.2369
CUST_1867_PI443154341	6666666.414137.peg.1836
CUST_1047_PI443154341	6666666.414137.peg.1031
CUST_4744_PI443154341	6666666.414137.peg.4661
CUST_4334_PI443154341	6666666.414137.peg.4254
CUST_2042_PI443154341	6666666.414137.peg.2009
CUST_4251_PI443154341	6666666.414137.peg.4171
CUST_5511_PI443154341	6666666.414137.peg.5423
CUST_2284_PI443154341	6666666.414137.peg.2250
CUST_4522_PI443154341	6666666.414137.peg.4439
CUST_5847_PI443154341	6666666.414137.peg.5758
CUST_4293_PI443154341	6666666.414137.peg.4213
CUST_1762_PI443154341	6666666.414137.peg.1732
CUST_1894_PI443154341	6666666.414137.peg.1863
CUST_1602_PI443154341	6666666.414137.peg.1574
CUST_3018_PI443154341	6666666.414137.peg.2963
CUST_2108_PI443154341	6666666.414137.peg.2074
CUST_793_PI443154341	6666666.414137.peg.780
CUST_987_PI443154341	6666666.414137.peg.972
CUST_2711_PI443154341	6666666.414137.peg.2664
CUST_2794_PI443154341	6666666.414137.peg.2744
CUST_4297_PI443154341	6666666.414137.peg.4217
CUST_1932_PI443154341	6666666.414137.peg.1901
CUST_5038_PI443154341	6666666.414137.peg.4953
CUST_2141_PI443154341	6666666.414137.peg.2107
CUST_3543_PI443154341	6666666.414137.peg.3471
CUST_3160_PI443154341	6666666.414137.peg.3102
CUST_2297_PI443154341	6666666.414137.peg.2263
CUST_844_PI443154341	6666666.414137.peg.829
CUST_4674_PI443154341	6666666.414137.peg.4591
CUST_5474_PI443154341	6666666.414137.peg.5386
CUST_4294_PI443154341	6666666.414137.peg.4214
CUST_398_PI443154341	6666666.414137.peg.391
CUST_5795_PI443154341	6666666.414137.peg.5706
CUST_707_PI443154341	6666666.414137.peg.696
CUST_3478_PI443154341	6666666.414137.peg.3408
CUST_5410_PI443154341	6666666.414137.peg.5322
CUST_2016_PI443154341	6666666.414137.peg.1983
CUST_265_PI443154341	6666666.414137.peg.258
CUST_5016_PI443154341	6666666.414137.peg.4931
CUST_402_PI443154341	6666666.414137.peg.395
CUST_1878_PI443154341	6666666.414137.peg.1847
CUST_2439_PI443154341	6666666.414137.peg.2401
CUST_4467_PI443154341	6666666.414137.peg.4386
CUST_572_PI443154341	6666666.414137.peg.562
CUST_2693_PI443154341	6666666.414137.peg.2646
CUST_3364_PI443154341	6666666.414137.peg.3300
CUST_4548_PI443154341	6666666.414137.peg.4465
CUST_5865_PI443154341	6666666.414137.peg.5776
CUST_1313_PI443154341	6666666.414137.peg.1293
CUST_100_PI443154341	6666666.414137.peg.98
CUST_5096_PI443154341	6666666.414137.peg.5010
CUST_3314_PI443154341	6666666.414137.peg.3252
CUST_1838_PI443154341	6666666.414137.peg.1807
CUST_3855_PI443154341	6666666.414137.peg.3781
CUST_2404_PI443154341	6666666.414137.peg.2366
CUST_4069_PI443154341	6666666.414137.peg.3993
CUST_540_PI443154341	6666666.414137.peg.530
CUST_3515_PI443154341	6666666.414137.peg.3443
CUST_42_PI443154341	6666666.414137.peg.41
CUST_3666_PI443154341	6666666.414137.peg.3594
CUST_1308_PI443154341	6666666.414137.peg.1288
CUST_4638_PI443154341	6666666.414137.peg.4555
CUST_6010_PI443154341	6666666.414137.peg.5919
CUST_1123_PI443154341	6666666.414137.peg.1106
CUST_4997_PI443154341	6666666.414137.peg.4912
CUST_693_PI443154341	6666666.414137.peg.682
CUST_821_PI443154341	6666666.414137.peg.808
CUST_4466_PI443154341	6666666.414137.peg.4385
CUST_1813_PI443154341	6666666.414137.peg.1782
CUST_4791_PI443154341	6666666.414137.peg.4706
CUST_1133_PI443154341	6666666.414137.peg.1116
CUST_887_PI443154341	6666666.414137.peg.872
CUST_4207_PI443154341	6666666.414137.peg.4127
CUST_1577_PI443154341	6666666.414137.peg.1549
CUST_2029_PI443154341	6666666.414137.peg.1996
CUST_5310_PI443154341	6666666.414137.peg.5222
CUST_5959_PI443154341	6666666.414137.peg.5869
CUST_5085_PI443154341	6666666.414137.peg.4999
CUST_2893_PI443154341	6666666.414137.peg.2842
CUST_2646_PI443154341	6666666.414137.peg.2602
CUST_811_PI443154341	6666666.414137.peg.798
CUST_3946_PI443154341	6666666.414137.peg.3872
CUST_755_PI443154341	6666666.414137.peg.742
CUST_3485_PI443154341	6666666.414137.peg.3413
CUST_3255_PI443154341	6666666.414137.peg.3197
CUST_384_PI443154341	6666666.414137.peg.377
CUST_765_PI443154341	6666666.414137.peg.752
CUST_3869_PI443154341	6666666.414137.peg.3795
CUST_2510_PI443154341	6666666.414137.peg.2466
CUST_2213_PI443154341	6666666.414137.peg.2179
CUST_3120_PI443154341	6666666.414137.peg.3062
CUST_767_PI443154341	6666666.414137.peg.754
CUST_4570_PI443154341	6666666.414137.peg.4487
CUST_533_PI443154341	6666666.414137.peg.523
CUST_4541_PI443154341	6666666.414137.peg.4458
CUST_2610_PI443154341	6666666.414137.peg.2565
CUST_5600_PI443154341	6666666.414137.peg.5512
CUST_2708_PI443154341	6666666.414137.peg.2661
CUST_339_PI443154341	6666666.414137.peg.332
CUST_3797_PI443154341	6666666.414137.peg.3723
CUST_4371_PI443154341	6666666.414137.peg.4291
CUST_2882_PI443154341	6666666.414137.peg.2831
CUST_2473_PI443154341	6666666.414137.peg.2430
CUST_3423_PI443154341	6666666.414137.repeat.30
CUST_5312_PI443154341	6666666.414137.peg.5224
CUST_3428_PI443154341	6666666.414137.peg.3361
CUST_5739_PI443154341	6666666.414137.peg.5651
CUST_1398_PI443154341	6666666.414137.peg.1377
CUST_4043_PI443154341	6666666.414137.peg.3967
CUST_1772_PI443154341	6666666.414137.peg.1741
CUST_4947_PI443154341	6666666.414137.peg.4862
CUST_2909_PI443154341	6666666.414137.peg.2858
CUST_5092_PI443154341	6666666.414137.peg.5006
CUST_1630_PI443154341	6666666.414137.peg.1600
CUST_4008_PI443154341	6666666.414137.peg.3932
CUST_3906_PI443154341	6666666.414137.peg.3832
CUST_3736_PI443154341	6666666.414137.peg.3663
CUST_1222_PI443154341	6666666.414137.peg.1203
CUST_1754_PI443154341	6666666.414137.peg.1724
CUST_2314_PI443154341	6666666.414137.peg.2279
CUST_2940_PI443154341	6666666.414137.peg.2888
CUST_199_PI443154341	6666666.414137.peg.195
CUST_4375_PI443154341	6666666.414137.peg.4295
CUST_196_PI443154341	6666666.414137.peg.192
CUST_5208_PI443154341	6666666.414137.peg.5120
CUST_4727_PI443154341	6666666.414137.peg.4644
CUST_4675_PI443154341	6666666.414137.peg.4592
CUST_4023_PI443154341	6666666.414137.peg.3947
CUST_6014_PI443154341	6666666.414137.peg.5923
CUST_37_PI443154341	6666666.414137.peg.36
CUST_3075_PI443154341	6666666.414137.peg.3019
CUST_4969_PI443154341	6666666.414137.peg.4884
CUST_126_PI443154341	6666666.414137.peg.122
CUST_3514_PI443154341	6666666.414137.peg.3442
CUST_5344_PI443154341	6666666.414137.peg.5256
CUST_3243_PI443154341	6666666.414137.peg.3185
CUST_2075_PI443154341	6666666.414137.peg.2042
CUST_1310_PI443154341	6666666.414137.peg.1290
CUST_2013_PI443154341	6666666.414137.peg.1980
CUST_3385_PI443154341	6666666.414137.repeat.29
CUST_5850_PI443154341	6666666.414137.peg.5761
CUST_460_PI443154341	6666666.414137.peg.450
CUST_4695_PI443154341	6666666.414137.peg.4612
CUST_4503_PI443154341	6666666.414137.peg.4421
CUST_3024_PI443154341	6666666.414137.peg.2968
CUST_5139_PI443154341	6666666.414137.repeat.42
CUST_4957_PI443154341	6666666.414137.peg.4872
CUST_15_PI443154341	6666666.414137.peg.14
CUST_1358_PI443154341	6666666.414137.peg.1338
CUST_1298_PI443154341	6666666.414137.peg.1278
CUST_3003_PI443154341	6666666.414137.rna.34
CUST_3402_PI443154341	6666666.414137.peg.3337
CUST_5767_PI443154341	6666666.414137.peg.5678
CUST_2595_PI443154341	6666666.414137.peg.2550
CUST_5295_PI443154341	6666666.414137.peg.5207
CUST_4308_PI443154341	6666666.414137.peg.4228
CUST_1168_PI443154341	6666666.414137.peg.1149
CUST_896_PI443154341	6666666.414137.peg.881
CUST_4197_PI443154341	6666666.414137.peg.4117
CUST_1211_PI443154341	6666666.414137.peg.1192
CUST_1060_PI443154341	6666666.414137.peg.1044
CUST_2561_PI443154341	6666666.414137.repeat.22
CUST_5991_PI443154341	6666666.414137.peg.5900
CUST_563_PI443154341	6666666.414137.peg.553
CUST_4415_PI443154341	6666666.414137.peg.4335
CUST_3001_PI443154341	6666666.414137.peg.2949
CUST_773_PI443154341	6666666.414137.peg.760
CUST_3239_PI443154341	6666666.414137.peg.3181
CUST_4298_PI443154341	6666666.414137.peg.4218
CUST_1551_PI443154341	6666666.414137.peg.1523
CUST_5898_PI443154341	6666666.414137.peg.5808
CUST_4652_PI443154341	6666666.414137.peg.4569
CUST_5938_PI443154341	6666666.414137.peg.5848
CUST_3108_PI443154341	6666666.414137.peg.3050
CUST_1523_PI443154341	6666666.414137.peg.1495
CUST_1763_PI443154341	6666666.414137.peg.1733
CUST_3170_PI443154341	6666666.414137.peg.3112
CUST_1364_PI443154341	6666666.414137.peg.1344
CUST_4317_PI443154341	6666666.414137.peg.4237
CUST_1348_PI443154341	6666666.414137.peg.1328
CUST_4630_PI443154341	6666666.414137.peg.4547
CUST_3130_PI443154341	6666666.414137.peg.3072
CUST_3204_PI443154341	6666666.414137.peg.3146
CUST_718_PI443154341	6666666.414137.peg.707
CUST_4659_PI443154341	6666666.414137.peg.4576
CUST_3603_PI443154341	6666666.414137.peg.3531
CUST_5578_PI443154341	6666666.414137.peg.5490
CUST_588_PI443154341	6666666.414137.peg.578
CUST_3569_PI443154341	6666666.414137.peg.3497
CUST_1316_PI443154341	6666666.414137.peg.1296
CUST_978_PI443154341	6666666.414137.peg.963
CUST_1904_PI443154341	6666666.414137.peg.1873
CUST_5117_PI443154341	6666666.414137.peg.5031
CUST_3324_PI443154341	6666666.414137.peg.3261
CUST_1412_PI443154341	6666666.414137.peg.1391
CUST_2026_PI443154341	6666666.414137.peg.1993
CUST_2160_PI443154341	6666666.414137.peg.2126
CUST_5467_PI443154341	6666666.414137.peg.5379
CUST_570_PI443154341	6666666.414137.peg.560
CUST_990_PI443154341	6666666.414137.peg.975
CUST_1320_PI443154341	6666666.414137.peg.1300
CUST_4487_PI443154341	6666666.414137.peg.4405
CUST_5076_PI443154341	6666666.414137.peg.4990
CUST_2887_PI443154341	6666666.414137.peg.2836
CUST_3322_PI443154341	6666666.414137.peg.3259
CUST_5664_PI443154341	6666666.414137.peg.5576
CUST_4436_PI443154341	6666666.414137.peg.4356
CUST_4071_PI443154341	6666666.414137.peg.3995
CUST_735_PI443154341	6666666.414137.peg.724
CUST_5464_PI443154341	6666666.414137.peg.5376
CUST_3381_PI443154341	6666666.414137.peg.3317
CUST_3566_PI443154341	6666666.414137.peg.3494
CUST_946_PI443154341	6666666.414137.peg.931
CUST_5604_PI443154341	6666666.414137.peg.5516
CUST_5670_PI443154341	6666666.414137.peg.5582
CUST_919_PI443154341	6666666.414137.peg.904
CUST_3685_PI443154341	6666666.414137.peg.3613
CUST_2529_PI443154341	6666666.414137.peg.2485
CUST_5745_PI443154341	6666666.414137.peg.5657
CUST_1741_PI443154341	6666666.414137.peg.1711
CUST_4851_PI443154341	6666666.414137.peg.4766
CUST_2513_PI443154341	6666666.414137.peg.2469
CUST_1512_PI443154341	6666666.414137.peg.1484
CUST_1794_PI443154341	6666666.414137.peg.1763
CUST_5563_PI443154341	6666666.414137.peg.5475
CUST_5672_PI443154341	6666666.414137.peg.5584
CUST_1292_PI443154341	6666666.414137.peg.1272
CUST_2434_PI443154341	6666666.414137.peg.2396
CUST_2761_PI443154341	6666666.414137.peg.2713
CUST_603_PI443154341	6666666.414137.peg.593
CUST_1457_PI443154341	6666666.414137.peg.1434
CUST_3511_PI443154341	6666666.414137.peg.3439
CUST_960_PI443154341	6666666.414137.peg.945
CUST_5350_PI443154341	6666666.414137.peg.5262
CUST_5303_PI443154341	6666666.414137.peg.5215
CUST_1620_PI443154341	6666666.414137.peg.1592
CUST_768_PI443154341	6666666.414137.peg.755
CUST_1427_PI443154341	6666666.414137.peg.1406
CUST_1803_PI443154341	6666666.414137.peg.1772
CUST_4187_PI443154341	6666666.414137.peg.4107
CUST_799_PI443154341	6666666.414137.peg.786
CUST_3474_PI443154341	6666666.414137.peg.3406
CUST_717_PI443154341	6666666.414137.peg.706
CUST_657_PI443154341	6666666.414137.peg.646
CUST_3926_PI443154341	6666666.414137.peg.3852
CUST_4057_PI443154341	6666666.414137.peg.3981
CUST_2825_PI443154341	6666666.414137.peg.2774
CUST_438_PI443154341	6666666.414137.peg.428
CUST_80_PI443154341	6666666.414137.peg.79
CUST_2950_PI443154341	6666666.414137.peg.2898
CUST_3242_PI443154341	6666666.414137.peg.3184
CUST_2180_PI443154341	6666666.414137.peg.2146
CUST_257_PI443154341	6666666.414137.peg.250
CUST_4749_PI443154341	6666666.414137.peg.4666
CUST_2533_PI443154341	6666666.414137.peg.2489
CUST_2951_PI443154341	6666666.414137.peg.2899
CUST_4838_PI443154341	6666666.414137.peg.4753
CUST_1600_PI443154341	6666666.414137.peg.1572
CUST_3986_PI443154341	6666666.414137.peg.3910
CUST_3127_PI443154341	6666666.414137.peg.3069
CUST_801_PI443154341	6666666.414137.peg.788
CUST_1663_PI443154341	6666666.414137.peg.1633
CUST_1255_PI443154341	6666666.414137.peg.1235
CUST_2587_PI443154341	6666666.414137.peg.2542
CUST_5640_PI443154341	6666666.414137.peg.5552
CUST_1045_PI443154341	6666666.414137.peg.1029
CUST_3689_PI443154341	6666666.414137.peg.3617
CUST_2718_PI443154341	6666666.414137.peg.2670
CUST_2915_PI443154341	6666666.414137.peg.2864
CUST_2841_PI443154341	6666666.414137.peg.2790
CUST_1349_PI443154341	6666666.414137.peg.1329
CUST_4740_PI443154341	6666666.414137.peg.4657
CUST_4451_PI443154341	6666666.414137.peg.4370
CUST_5228_PI443154341	6666666.414137.peg.5140
CUST_5112_PI443154341	6666666.414137.peg.5026
CUST_2102_PI443154341	6666666.414137.peg.2069
CUST_1927_PI443154341	6666666.414137.peg.1896
CUST_4845_PI443154341	6666666.414137.peg.4760
CUST_307_PI443154341	6666666.414137.peg.300
CUST_5103_PI443154341	6666666.414137.peg.5017
CUST_1986_PI443154341	6666666.414137.peg.1955
CUST_5244_PI443154341	6666666.414137.peg.5156
CUST_3701_PI443154341	6666666.414137.peg.3628
CUST_4975_PI443154341	6666666.414137.peg.4890
CUST_4846_PI443154341	6666666.414137.peg.4761
CUST_3199_PI443154341	6666666.414137.peg.3141
CUST_2049_PI443154341	6666666.414137.peg.2016
CUST_1834_PI443154341	6666666.414137.peg.1803
CUST_5218_PI443154341	6666666.414137.peg.5130
CUST_3437_PI443154341	6666666.414137.peg.3370
CUST_1022_PI443154341	6666666.414137.peg.1006
CUST_534_PI443154341	6666666.414137.peg.524
CUST_1856_PI443154341	6666666.414137.peg.1825
CUST_947_PI443154341	6666666.414137.peg.932
CUST_4182_PI443154341	6666666.414137.peg.4102
CUST_5262_PI443154341	6666666.414137.peg.5174
CUST_2776_PI443154341	6666666.414137.peg.2726
CUST_3005_PI443154341	6666666.414137.rna.36
CUST_159_PI443154341	6666666.414137.peg.155
CUST_1171_PI443154341	6666666.414137.peg.1152
CUST_5027_PI443154341	6666666.414137.peg.4942
CUST_130_PI443154341	6666666.414137.peg.126
CUST_4819_PI443154341	6666666.414137.peg.4734
CUST_2866_PI443154341	6666666.414137.peg.2815
CUST_743_PI443154341	6666666.414137.peg.732
CUST_4679_PI443154341	6666666.414137.peg.4596
CUST_4620_PI443154341	6666666.414137.peg.4537
CUST_4723_PI443154341	6666666.414137.peg.4640
CUST_5573_PI443154341	6666666.414137.peg.5485
CUST_5037_PI443154341	6666666.414137.peg.4952
CUST_3727_PI443154341	6666666.414137.peg.3654
CUST_4526_PI443154341	6666666.414137.peg.4443
CUST_3951_PI443154341	6666666.414137.peg.3877
CUST_2460_PI443154341	6666666.414137.peg.2417
CUST_2498_PI443154341	6666666.414137.peg.2455
CUST_228_PI443154341	6666666.414137.peg.221
CUST_3456_PI443154341	6666666.414137.peg.3388
CUST_510_PI443154341	6666666.414137.peg.500
CUST_5780_PI443154341	6666666.414137.peg.5691
CUST_146_PI443154341	6666666.414137.peg.142
CUST_3965_PI443154341	6666666.414137.peg.3890
CUST_3287_PI443154341	6666666.414137.peg.3229
CUST_1178_PI443154341	6666666.414137.peg.1159
CUST_2666_PI443154341	6666666.414137.rna.30
CUST_633_PI443154341	6666666.414137.peg.622
CUST_322_PI443154341	6666666.414137.peg.315
CUST_4697_PI443154341	6666666.414137.peg.4614
CUST_3943_PI443154341	6666666.414137.peg.3869
CUST_5321_PI443154341	6666666.414137.peg.5233
CUST_4039_PI443154341	6666666.414137.peg.3963
CUST_1766_PI443154341	6666666.414137.peg.1736
CUST_3158_PI443154341	6666666.414137.peg.3100
CUST_3752_PI443154341	6666666.414137.peg.3679
CUST_4028_PI443154341	6666666.414137.peg.3952
CUST_2458_PI443154341	6666666.414137.peg.2416
CUST_5177_PI443154341	6666666.414137.peg.5089
CUST_1721_PI443154341	6666666.414137.peg.1691
CUST_5445_PI443154341	6666666.414137.peg.5357
CUST_2150_PI443154341	6666666.414137.peg.2116
CUST_564_PI443154341	6666666.414137.peg.554
CUST_2455_PI443154341	6666666.414137.peg.2413
CUST_2925_PI443154341	6666666.414137.peg.2873
CUST_3093_PI443154341	6666666.414137.peg.3036
CUST_5818_PI443154341	6666666.414137.peg.5729
CUST_5998_PI443154341	6666666.414137.peg.5907
CUST_4663_PI443154341	6666666.414137.peg.4580
CUST_5113_PI443154341	6666666.414137.peg.5027
CUST_2347_PI443154341	6666666.414137.peg.2312
CUST_156_PI443154341	6666666.414137.peg.152
CUST_2448_PI443154341	6666666.414137.peg.2406
CUST_3044_PI443154341	6666666.414137.peg.2988
CUST_5382_PI443154341	6666666.414137.peg.5294
CUST_4221_PI443154341	6666666.414137.peg.4141
CUST_778_PI443154341	6666666.414137.peg.765
CUST_4795_PI443154341	6666666.414137.peg.4710
CUST_4320_PI443154341	6666666.414137.peg.4240
CUST_1680_PI443154341	6666666.414137.peg.1650
CUST_1823_PI443154341	6666666.414137.peg.1792
CUST_2032_PI443154341	6666666.414137.peg.1999
CUST_1896_PI443154341	6666666.414137.peg.1865
CUST_226_PI443154341	6666666.414137.peg.219
CUST_2846_PI443154341	6666666.414137.peg.2795
CUST_5915_PI443154341	6666666.414137.peg.5825
CUST_1703_PI443154341	6666666.414137.peg.1673
CUST_1362_PI443154341	6666666.414137.peg.1342
CUST_1044_PI443154341	6666666.414137.peg.1028
CUST_1375_PI443154341	6666666.414137.peg.1355
CUST_410_PI443154341	6666666.414137.peg.403
CUST_1301_PI443154341	6666666.414137.peg.1281
CUST_682_PI443154341	6666666.414137.peg.671
CUST_2941_PI443154341	6666666.414137.peg.2889
CUST_1237_PI443154341	6666666.414137.peg.1218
CUST_3202_PI443154341	6666666.414137.peg.3144
CUST_3405_PI443154341	6666666.414137.peg.3340
CUST_4264_PI443154341	6666666.414137.peg.4184
CUST_5320_PI443154341	6666666.414137.peg.5232
CUST_4048_PI443154341	6666666.414137.peg.3972
CUST_1568_PI443154341	6666666.414137.peg.1540
CUST_1252_PI443154341	6666666.414137.peg.1233
CUST_2023_PI443154341	6666666.414137.peg.1990
CUST_2746_PI443154341	6666666.414137.peg.2698
CUST_442_PI443154341	6666666.414137.peg.432
CUST_4219_PI443154341	6666666.414137.peg.4139
CUST_6002_PI443154341	6666666.414137.peg.5911
CUST_87_PI443154341	6666666.414137.peg.86
CUST_1273_PI443154341	6666666.414137.peg.1253
CUST_2472_PI443154341	6666666.414137.peg.2429
CUST_2088_PI443154341	6666666.414137.peg.2055
CUST_3762_PI443154341	6666666.414137.peg.3688
CUST_1926_PI443154341	6666666.414137.peg.1895
CUST_3853_PI443154341	6666666.414137.peg.3779
CUST_5189_PI443154341	6666666.414137.peg.5101
CUST_3820_PI443154341	6666666.414137.peg.3746
CUST_2306_PI443154341	6666666.414137.peg.2271
CUST_4193_PI443154341	6666666.414137.peg.4113
CUST_3439_PI443154341	6666666.414137.peg.3372
CUST_1383_PI443154341	6666666.414137.repeat.11
CUST_2853_PI443154341	6666666.414137.peg.2802
CUST_2618_PI443154341	6666666.414137.peg.2573
CUST_448_PI443154341	6666666.414137.peg.438
CUST_1543_PI443154341	6666666.414137.peg.1515
CUST_21_PI443154341	6666666.414137.peg.20
CUST_4312_PI443154341	6666666.414137.peg.4232
CUST_1461_PI443154341	6666666.414137.peg.1438
CUST_4314_PI443154341	6666666.414137.peg.4234
CUST_2590_PI443154341	6666666.414137.peg.2545
CUST_3902_PI443154341	6666666.414137.peg.3828
CUST_3138_PI443154341	6666666.414137.peg.3080
CUST_972_PI443154341	6666666.414137.peg.957
CUST_1662_PI443154341	6666666.414137.peg.1632
CUST_2632_PI443154341	6666666.414137.peg.2588
CUST_236_PI443154341	6666666.414137.peg.229
CUST_1347_PI443154341	6666666.414137.peg.1327
CUST_4139_PI443154341	6666666.414137.peg.4059
CUST_5478_PI443154341	6666666.414137.peg.5390
CUST_1595_PI443154341	6666666.414137.peg.1567
CUST_1414_PI443154341	6666666.414137.peg.1393
CUST_851_PI443154341	6666666.414137.peg.836
CUST_5953_PI443154341	6666666.414137.peg.5863
CUST_2273_PI443154341	6666666.414137.peg.2239
CUST_5885_PI443154341	6666666.414137.peg.5795
CUST_3854_PI443154341	6666666.414137.peg.3780
CUST_5276_PI443154341	6666666.414137.peg.5188
CUST_3391_PI443154341	6666666.414137.peg.3326
CUST_4135_PI443154341	6666666.414137.peg.4055
CUST_4891_PI443154341	6666666.414137.peg.4806
CUST_2867_PI443154341	6666666.414137.peg.2816
CUST_4013_PI443154341	6666666.414137.peg.3937
CUST_4628_PI443154341	6666666.414137.peg.4545
CUST_2036_PI443154341	6666666.414137.peg.2003
CUST_5481_PI443154341	6666666.414137.peg.5393
CUST_4904_PI443154341	6666666.414137.peg.4819
CUST_3268_PI443154341	6666666.414137.peg.3210
CUST_3878_PI443154341	6666666.414137.peg.3804
CUST_3822_PI443154341	6666666.414137.peg.3748
CUST_4100_PI443154341	6666666.414137.peg.4020
CUST_3110_PI443154341	6666666.414137.peg.3052
CUST_353_PI443154341	6666666.414137.peg.346
CUST_1475_PI443154341	6666666.414137.peg.1452
CUST_1654_PI443154341	6666666.414137.peg.1624
CUST_1852_PI443154341	6666666.414137.peg.1821
CUST_4392_PI443154341	6666666.414137.peg.4312
CUST_5526_PI443154341	6666666.414137.peg.5438
CUST_3282_PI443154341	6666666.414137.peg.3224
CUST_3577_PI443154341	6666666.414137.peg.3505
CUST_4228_PI443154341	6666666.414137.peg.4148
CUST_1637_PI443154341	6666666.414137.peg.1607
CUST_1184_PI443154341	6666666.414137.peg.1165
CUST_2212_PI443154341	6666666.414137.peg.2178
CUST_576_PI443154341	6666666.414137.peg.566
CUST_3889_PI443154341	6666666.414137.peg.3815
CUST_3681_PI443154341	6666666.414137.peg.3609
CUST_1151_PI443154341	6666666.414137.peg.1132
CUST_5308_PI443154341	6666666.414137.peg.5220
CUST_315_PI443154341	6666666.414137.peg.308
CUST_6001_PI443154341	6666666.414137.peg.5910
CUST_19_PI443154341	6666666.414137.peg.18
CUST_4473_PI443154341	6666666.414137.peg.4392
CUST_4721_PI443154341	6666666.414137.peg.4638
CUST_4237_PI443154341	6666666.414137.peg.4157
CUST_831_PI443154341	6666666.414137.repeat.6
CUST_4761_PI443154341	6666666.414137.peg.4676
CUST_319_PI443154341	6666666.414137.peg.312
CUST_3832_PI443154341	6666666.414137.peg.3758
CUST_499_PI443154341	6666666.414137.peg.489
CUST_3529_PI443154341	6666666.414137.peg.3457
CUST_1839_PI443154341	6666666.414137.peg.1808
CUST_5768_PI443154341	6666666.414137.peg.5679
CUST_3317_PI443154341	6666666.414137.peg.3255
CUST_4390_PI443154341	6666666.414137.peg.4310
CUST_4782_PI443154341	6666666.414137.peg.4697
CUST_5811_PI443154341	6666666.414137.peg.5722
CUST_1156_PI443154341	6666666.414137.peg.1137
CUST_1539_PI443154341	6666666.414137.peg.1511
CUST_2045_PI443154341	6666666.414137.peg.2012
CUST_4879_PI443154341	6666666.414137.peg.4794
CUST_3700_PI443154341	6666666.414137.peg.3627
CUST_907_PI443154341	6666666.414137.peg.892
CUST_3630_PI443154341	6666666.414137.peg.3558
CUST_1702_PI443154341	6666666.414137.peg.1672
CUST_4606_PI443154341	6666666.414137.peg.4523
CUST_378_PI443154341	6666666.414137.peg.371
CUST_5518_PI443154341	6666666.414137.peg.5430
CUST_2493_PI443154341	6666666.414137.peg.2450
CUST_1409_PI443154341	6666666.414137.peg.1388
CUST_3077_PI443154341	6666666.414137.peg.3021
CUST_5403_PI443154341	6666666.414137.peg.5315
CUST_4938_PI443154341	6666666.414137.peg.4853
CUST_4101_PI443154341	6666666.414137.peg.4021
CUST_5541_PI443154341	6666666.414137.peg.5453
CUST_78_PI443154341	6666666.414137.peg.77
CUST_2565_PI443154341	6666666.414137.peg.2520
CUST_457_PI443154341	6666666.414137.peg.447
CUST_462_PI443154341	6666666.414137.peg.452
CUST_4235_PI443154341	6666666.414137.peg.4155
CUST_1309_PI443154341	6666666.414137.peg.1289
CUST_1283_PI443154341	6666666.414137.peg.1263
CUST_781_PI443154341	6666666.414137.peg.768
CUST_4476_PI443154341	6666666.414137.peg.4395
CUST_2401_PI443154341	6666666.414137.peg.2363
CUST_4983_PI443154341	6666666.414137.peg.4898
CUST_5904_PI443154341	6666666.414137.peg.5814
CUST_3734_PI443154341	6666666.414137.peg.3661
CUST_920_PI443154341	6666666.414137.peg.905
CUST_2154_PI443154341	6666666.414137.peg.2120
CUST_3962_PI443154341	6666666.414137.peg.3887
CUST_1658_PI443154341	6666666.414137.peg.1628
CUST_4959_PI443154341	6666666.414137.peg.4874
CUST_3693_PI443154341	6666666.414137.peg.3621
CUST_14_PI443154341	6666666.414137.peg.13
CUST_2112_PI443154341	6666666.414137.peg.2078
CUST_4183_PI443154341	6666666.414137.peg.4103
CUST_3945_PI443154341	6666666.414137.peg.3871
CUST_4637_PI443154341	6666666.414137.peg.4554
CUST_1837_PI443154341	6666666.414137.peg.1806
CUST_1157_PI443154341	6666666.414137.peg.1138
CUST_5735_PI443154341	6666666.414137.peg.5647
CUST_664_PI443154341	6666666.414137.peg.653
CUST_2402_PI443154341	6666666.414137.peg.2364
CUST_3788_PI443154341	6666666.414137.peg.3714
CUST_1491_PI443154341	6666666.414137.peg.1468
CUST_153_PI443154341	6666666.414137.peg.149
CUST_3201_PI443154341	6666666.414137.peg.3143
CUST_5629_PI443154341	6666666.414137.peg.5541
CUST_3973_PI443154341	6666666.414137.peg.3897
CUST_2868_PI443154341	6666666.414137.peg.2817
CUST_575_PI443154341	6666666.414137.peg.565
CUST_4683_PI443154341	6666666.414137.peg.4600
CUST_1530_PI443154341	6666666.414137.peg.1502
CUST_1013_PI443154341	6666666.414137.peg.997
CUST_4977_PI443154341	6666666.414137.peg.4892
CUST_2859_PI443154341	6666666.414137.peg.2808
CUST_3690_PI443154341	6666666.414137.peg.3618
CUST_5852_PI443154341	6666666.414137.peg.5763
CUST_3251_PI443154341	6666666.414137.peg.3193
CUST_1002_PI443154341	6666666.414137.peg.986
CUST_1440_PI443154341	6666666.414137.peg.1419
CUST_3188_PI443154341	6666666.414137.peg.3130
CUST_433_PI443154341	6666666.414137.repeat.4
CUST_5070_PI443154341	6666666.414137.peg.4984
CUST_2017_PI443154341	6666666.414137.peg.1984
CUST_5333_PI443154341	6666666.414137.peg.5245
CUST_2555_PI443154341	6666666.414137.peg.2511
CUST_2444_PI443154341	6666666.414137.peg.2404
CUST_883_PI443154341	6666666.414137.peg.868
CUST_4385_PI443154341	6666666.414137.peg.4305
CUST_1057_PI443154341	6666666.414137.peg.1041
CUST_1796_PI443154341	6666666.414137.peg.1765
CUST_3679_PI443154341	6666666.414137.peg.3607
CUST_4825_PI443154341	6666666.414137.peg.4740
CUST_4054_PI443154341	6666666.414137.peg.3978
CUST_2554_PI443154341	6666666.414137.peg.2510
CUST_1076_PI443154341	6666666.414137.peg.1059
CUST_5616_PI443154341	6666666.414137.peg.5528
CUST_4174_PI443154341	6666666.414137.peg.4094
CUST_5949_PI443154341	6666666.414137.peg.5859
CUST_71_PI443154341	6666666.414137.peg.70
CUST_2144_PI443154341	6666666.414137.peg.2110
CUST_3281_PI443154341	6666666.414137.peg.3223
CUST_3190_PI443154341	6666666.414137.peg.3132
CUST_4129_PI443154341	6666666.414137.peg.4049
CUST_5302_PI443154341	6666666.414137.peg.5214
CUST_266_PI443154341	6666666.414137.peg.259
CUST_1046_PI443154341	6666666.414137.peg.1030
CUST_1493_PI443154341	6666666.414137.peg.1470
CUST_977_PI443154341	6666666.414137.peg.962
CUST_1699_PI443154341	6666666.414137.peg.1669
CUST_1731_PI443154341	6666666.414137.peg.1701
CUST_1166_PI443154341	6666666.414137.peg.1147
CUST_2443_PI443154341	6666666.414137.rna.27
CUST_5145_PI443154341	6666666.414137.peg.5058
CUST_905_PI443154341	6666666.414137.peg.890
CUST_1619_PI443154341	6666666.414137.peg.1591
CUST_109_PI443154341	6666666.414137.peg.106
CUST_1514_PI443154341	6666666.414137.peg.1486
CUST_4552_PI443154341	6666666.414137.peg.4469
CUST_2091_PI443154341	6666666.414137.peg.2058
CUST_3252_PI443154341	6666666.414137.peg.3194
CUST_5812_PI443154341	6666666.414137.peg.5723
CUST_1460_PI443154341	6666666.414137.peg.1437
CUST_279_PI443154341	6666666.414137.peg.272
CUST_5524_PI443154341	6666666.414137.peg.5436
CUST_372_PI443154341	6666666.414137.peg.365
CUST_1037_PI443154341	6666666.414137.peg.1021
CUST_1080_PI443154341	6666666.414137.peg.1063
CUST_2981_PI443154341	6666666.414137.peg.2929
CUST_1234_PI443154341	6666666.414137.peg.1215
CUST_3030_PI443154341	6666666.414137.peg.2974
CUST_5947_PI443154341	6666666.414137.peg.5857
CUST_5165_PI443154341	6666666.414137.peg.5077
CUST_383_PI443154341	6666666.414137.peg.376
CUST_5366_PI443154341	6666666.414137.peg.5278
CUST_5995_PI443154341	6666666.414137.peg.5904
CUST_2812_PI443154341	6666666.414137.peg.2762
CUST_4692_PI443154341	6666666.414137.peg.4609
CUST_4136_PI443154341	6666666.414137.peg.4056
CUST_5789_PI443154341	6666666.414137.peg.5700
CUST_5525_PI443154341	6666666.414137.peg.5437
CUST_3473_PI443154341	6666666.414137.peg.3405
CUST_72_PI443154341	6666666.414137.peg.71
CUST_1219_PI443154341	6666666.414137.peg.1200
CUST_3460_PI443154341	6666666.414137.peg.3392
CUST_3440_PI443154341	6666666.414137.peg.3373
CUST_2384_PI443154341	6666666.414137.peg.2348
CUST_2674_PI443154341	6666666.414137.peg.2627
CUST_4940_PI443154341	6666666.414137.peg.4855
CUST_4508_PI443154341	6666666.414137.peg.4425
CUST_3872_PI443154341	6666666.414137.peg.3798
CUST_4223_PI443154341	6666666.414137.peg.4143
CUST_3557_PI443154341	6666666.414137.peg.3485
CUST_5249_PI443154341	6666666.414137.peg.5161
CUST_2747_PI443154341	6666666.414137.peg.2699
CUST_2654_PI443154341	6666666.414137.peg.2610
CUST_2155_PI443154341	6666666.414137.peg.2121
CUST_2884_PI443154341	6666666.414137.peg.2833
CUST_233_PI443154341	6666666.414137.peg.226
CUST_2754_PI443154341	6666666.414137.peg.2706
CUST_5721_PI443154341	6666666.414137.peg.5633
CUST_3759_PI443154341	6666666.414137.repeat.36
CUST_2995_PI443154341	6666666.414137.peg.2943
CUST_2686_PI443154341	6666666.414137.peg.2639
CUST_2378_PI443154341	6666666.414137.peg.2342
CUST_3967_PI443154341	6666666.414137.peg.3892
CUST_5360_PI443154341	6666666.414137.peg.5272
CUST_2862_PI443154341	6666666.414137.peg.2811
CUST_5723_PI443154341	6666666.414137.peg.5635
CUST_4444_PI443154341	6666666.414137.peg.4363
CUST_1243_PI443154341	6666666.414137.peg.1224
CUST_4716_PI443154341	6666666.414137.peg.4633
CUST_2298_PI443154341	6666666.414137.peg.2264
CUST_350_PI443154341	6666666.414137.peg.343
CUST_1330_PI443154341	6666666.414137.peg.1310
CUST_4607_PI443154341	6666666.414137.peg.4524
CUST_3850_PI443154341	6666666.414137.peg.3776
CUST_1456_PI443154341	6666666.414137.peg.1433
CUST_5238_PI443154341	6666666.414137.peg.5150
CUST_4281_PI443154341	6666666.414137.peg.4201
CUST_5881_PI443154341	6666666.414137.peg.5791
CUST_1417_PI443154341	6666666.414137.peg.1396
CUST_5807_PI443154341	6666666.414137.peg.5718
CUST_1618_PI443154341	6666666.414137.peg.1590
CUST_4209_PI443154341	6666666.414137.peg.4129
CUST_355_PI443154341	6666666.414137.peg.348
CUST_2427_PI443154341	6666666.414137.peg.2389
CUST_3728_PI443154341	6666666.414137.peg.3655
CUST_4434_PI443154341	6666666.414137.peg.4354
CUST_3294_PI443154341	6666666.414137.peg.3236
CUST_1836_PI443154341	6666666.414137.peg.1805
CUST_5974_PI443154341	6666666.414137.peg.5883
CUST_5201_PI443154341	6666666.414137.peg.5113
CUST_2798_PI443154341	6666666.414137.peg.2748
CUST_3059_PI443154341	6666666.414137.peg.3003
CUST_4855_PI443154341	6666666.414137.peg.4770
CUST_5716_PI443154341	6666666.414137.peg.5628
CUST_5540_PI443154341	6666666.414137.peg.5452
CUST_4465_PI443154341	6666666.414137.peg.4384
CUST_4461_PI443154341	6666666.414137.peg.4380
CUST_4859_PI443154341	6666666.414137.peg.4774
CUST_3605_PI443154341	6666666.414137.peg.3533
CUST_994_PI443154341	6666666.414137.peg.979
CUST_3147_PI443154341	6666666.414137.peg.3089
CUST_3434_PI443154341	6666666.414137.peg.3367
CUST_4310_PI443154341	6666666.414137.peg.4230
CUST_967_PI443154341	6666666.414137.peg.952
CUST_565_PI443154341	6666666.414137.peg.555
CUST_4786_PI443154341	6666666.414137.peg.4701
CUST_2514_PI443154341	6666666.414137.peg.2470
CUST_5479_PI443154341	6666666.414137.peg.5391
CUST_5568_PI443154341	6666666.414137.peg.5480
CUST_886_PI443154341	6666666.414137.peg.871
CUST_4003_PI443154341	6666666.414137.peg.3927
CUST_5213_PI443154341	6666666.414137.peg.5125
CUST_179_PI443154341	6666666.414137.peg.175
CUST_1937_PI443154341	6666666.414137.peg.1906
CUST_3037_PI443154341	6666666.414137.peg.2981
CUST_5286_PI443154341	6666666.414137.peg.5198
CUST_1213_PI443154341	6666666.414137.peg.1194
CUST_3912_PI443154341	6666666.414137.peg.3838
CUST_2842_PI443154341	6666666.414137.peg.2791
CUST_3715_PI443154341	6666666.414137.peg.3642
CUST_3164_PI443154341	6666666.414137.peg.3106
CUST_4189_PI443154341	6666666.414137.peg.4109
CUST_2153_PI443154341	6666666.414137.peg.2119
CUST_324_PI443154341	6666666.414137.peg.317
CUST_3410_PI443154341	6666666.414137.peg.3345
CUST_1321_PI443154341	6666666.414137.peg.1301
CUST_3804_PI443154341	6666666.414137.peg.3730
CUST_5034_PI443154341	6666666.414137.peg.4949
CUST_3657_PI443154341	6666666.414137.peg.3585
CUST_3932_PI443154341	6666666.414137.peg.3858
CUST_2960_PI443154341	6666666.414137.peg.2908
CUST_1416_PI443154341	6666666.414137.peg.1395
CUST_3208_PI443154341	6666666.414137.peg.3150
CUST_3623_PI443154341	6666666.414137.peg.3551
CUST_2878_PI443154341	6666666.414137.peg.2827
CUST_2820_PI443154341	6666666.414137.peg.2769
CUST_1322_PI443154341	6666666.414137.peg.1302
CUST_1396_PI443154341	6666666.414137.peg.1375
CUST_1289_PI443154341	6666666.414137.peg.1269
CUST_2081_PI443154341	6666666.414137.peg.2048
CUST_4861_PI443154341	6666666.414137.peg.4776
CUST_3751_PI443154341	6666666.414137.peg.3678
CUST_5323_PI443154341	6666666.414137.peg.5235
CUST_2811_PI443154341	6666666.414137.peg.2761
CUST_5453_PI443154341	6666666.414137.peg.5365
CUST_849_PI443154341	6666666.414137.peg.834
CUST_2970_PI443154341	6666666.414137.peg.2918
CUST_1496_PI443154341	6666666.414137.peg.1473
CUST_1692_PI443154341	6666666.414137.peg.1662
CUST_4777_PI443154341	6666666.414137.peg.4692
CUST_1707_PI443154341	6666666.414137.peg.1677
CUST_5386_PI443154341	6666666.414137.peg.5298
CUST_4345_PI443154341	6666666.414137.peg.4265
CUST_1560_PI443154341	6666666.414137.peg.1532
CUST_1644_PI443154341	6666666.414137.peg.1614
CUST_800_PI443154341	6666666.414137.peg.787
CUST_2253_PI443154341	6666666.414137.peg.2219
CUST_3085_PI443154341	6666666.414137.peg.3028
CUST_1559_PI443154341	6666666.414137.peg.1531
CUST_1649_PI443154341	6666666.414137.peg.1619
CUST_4774_PI443154341	6666666.414137.peg.4689
CUST_5965_PI443154341	6666666.414137.peg.5874
CUST_2833_PI443154341	6666666.414137.peg.2782
CUST_2490_PI443154341	6666666.414137.peg.2447
CUST_4700_PI443154341	6666666.414137.peg.4617
CUST_4785_PI443154341	6666666.414137.peg.4700
CUST_4994_PI443154341	6666666.414137.peg.4909
CUST_4180_PI443154341	6666666.414137.peg.4100
CUST_1288_PI443154341	6666666.414137.peg.1268
CUST_3429_PI443154341	6666666.414137.peg.3362
CUST_5661_PI443154341	6666666.414137.peg.5573
CUST_3555_PI443154341	6666666.414137.peg.3483
CUST_4112_PI443154341	6666666.414137.peg.4032
CUST_5718_PI443154341	6666666.414137.peg.5630
CUST_3394_PI443154341	6666666.414137.peg.3329
CUST_5981_PI443154341	6666666.414137.peg.5890
CUST_2817_PI443154341	6666666.414137.rna.32
CUST_584_PI443154341	6666666.414137.peg.574
CUST_2578_PI443154341	6666666.414137.peg.2533
CUST_3397_PI443154341	6666666.414137.peg.3332
CUST_4514_PI443154341	6666666.414137.peg.4431
CUST_6003_PI443154341	6666666.414137.peg.5912
CUST_5955_PI443154341	6666666.414137.peg.5865
CUST_2507_PI443154341	6666666.414137.peg.2464
CUST_5091_PI443154341	6666666.414137.peg.5005
CUST_2221_PI443154341	6666666.414137.peg.2187
CUST_1725_PI443154341	6666666.414137.peg.1695
CUST_4726_PI443154341	6666666.414137.peg.4643
CUST_4037_PI443154341	6666666.414137.peg.3961
CUST_3031_PI443154341	6666666.414137.peg.2975
CUST_5196_PI443154341	6666666.414137.peg.5108
CUST_194_PI443154341	6666666.414137.peg.190
CUST_5522_PI443154341	6666666.414137.peg.5434
CUST_3798_PI443154341	6666666.414137.peg.3724
CUST_3177_PI443154341	6666666.414137.peg.3119
CUST_1100_PI443154341	6666666.414137.peg.1083
CUST_4886_PI443154341	6666666.414137.peg.4801
CUST_4040_PI443154341	6666666.414137.peg.3964
CUST_1506_PI443154341	6666666.414137.peg.1483
CUST_2483_PI443154341	6666666.414137.peg.2440
CUST_5416_PI443154341	6666666.414137.peg.5328
CUST_1143_PI443154341	6666666.414137.peg.1124
CUST_2606_PI443154341	6666666.414137.peg.2561
CUST_3343_PI443154341	6666666.414137.peg.3280
CUST_3390_PI443154341	6666666.414137.peg.3325
CUST_3467_PI443154341	6666666.414137.peg.3399
CUST_2465_PI443154341	6666666.414137.peg.2422
CUST_4623_PI443154341	6666666.414137.peg.4540
CUST_1503_PI443154341	6666666.414137.peg.1480
CUST_591_PI443154341	6666666.414137.peg.581
CUST_351_PI443154341	6666666.414137.peg.344
CUST_3868_PI443154341	6666666.414137.peg.3794
CUST_496_PI443154341	6666666.414137.peg.486
CUST_4072_PI443154341	6666666.414137.peg.3996
CUST_3115_PI443154341	6666666.414137.peg.3057
CUST_97_PI443154341	6666666.414137.peg.95
CUST_4501_PI443154341	6666666.414137.peg.4419
CUST_3781_PI443154341	6666666.414137.peg.3707
CUST_2329_PI443154341	6666666.414137.peg.2294
CUST_343_PI443154341	6666666.414137.peg.336
CUST_2438_PI443154341	6666666.414137.peg.2400
CUST_3482_PI443154341	6666666.414137.peg.3410
CUST_5619_PI443154341	6666666.414137.peg.5531
CUST_511_PI443154341	6666666.414137.peg.501
CUST_18_PI443154341	6666666.414137.peg.17
CUST_1808_PI443154341	6666666.414137.peg.1777
CUST_3246_PI443154341	6666666.414137.peg.3188
CUST_2068_PI443154341	6666666.414137.peg.2035
CUST_4044_PI443154341	6666666.414137.peg.3968
CUST_5331_PI443154341	6666666.414137.peg.5243
CUST_1359_PI443154341	6666666.414137.peg.1339
CUST_737_PI443154341	6666666.414137.peg.726
CUST_5406_PI443154341	6666666.414137.peg.5318
CUST_2304_PI443154341	6666666.414137.peg.2269
CUST_5839_PI443154341	6666666.414137.peg.5750
CUST_4517_PI443154341	6666666.414137.peg.4434
CUST_545_PI443154341	6666666.414137.peg.535
CUST_1258_PI443154341	6666666.414137.peg.1238
CUST_1227_PI443154341	6666666.414137.peg.1208
CUST_5615_PI443154341	6666666.414137.peg.5527
CUST_1085_PI443154341	6666666.414137.peg.1068
CUST_5440_PI443154341	6666666.414137.peg.5352
CUST_2317_PI443154341	6666666.414137.peg.2282
CUST_586_PI443154341	6666666.414137.peg.576
CUST_4764_PI443154341	6666666.414137.peg.4679
CUST_2703_PI443154341	6666666.414137.peg.2656
CUST_50_PI443154341	6666666.414137.peg.49
CUST_4707_PI443154341	6666666.414137.peg.4624
CUST_2673_PI443154341	6666666.414137.peg.2626
CUST_1805_PI443154341	6666666.414137.peg.1774
CUST_2094_PI443154341	6666666.414137.peg.2061
CUST_1677_PI443154341	6666666.414137.peg.1647
CUST_4506_PI443154341	6666666.414137.peg.4423
CUST_1495_PI443154341	6666666.414137.peg.1472
CUST_1535_PI443154341	6666666.414137.peg.1507
CUST_1429_PI443154341	6666666.414137.peg.1408
CUST_4222_PI443154341	6666666.414137.peg.4142
CUST_3665_PI443154341	6666666.414137.peg.3593
CUST_5554_PI443154341	6666666.414137.peg.5466
CUST_3659_PI443154341	6666666.414137.peg.3587
CUST_2643_PI443154341	6666666.414137.peg.2599
CUST_5545_PI443154341	6666666.414137.peg.5457
CUST_3359_PI443154341	6666666.414137.peg.3295
CUST_5686_PI443154341	6666666.414137.peg.5598
CUST_5520_PI443154341	6666666.414137.peg.5432
CUST_3328_PI443154341	6666666.414137.peg.3265
CUST_2380_PI443154341	6666666.414137.peg.2344
CUST_3936_PI443154341	6666666.414137.peg.3862
CUST_2822_PI443154341	6666666.414137.peg.2771
CUST_2636_PI443154341	6666666.414137.peg.2592
CUST_198_PI443154341	6666666.414137.peg.194
CUST_5517_PI443154341	6666666.414137.peg.5429
CUST_3493_PI443154341	6666666.414137.peg.3421
CUST_5952_PI443154341	6666666.414137.peg.5862
CUST_4884_PI443154341	6666666.414137.peg.4799
CUST_6000_PI443154341	6666666.414137.peg.5909
CUST_2299_PI443154341	6666666.414137.repeat.17
CUST_2719_PI443154341	6666666.414137.peg.2671
CUST_449_PI443154341	6666666.414137.peg.439
CUST_5064_PI443154341	6666666.414137.peg.4978
CUST_2430_PI443154341	6666666.414137.peg.2392
CUST_5538_PI443154341	6666666.414137.peg.5450
CUST_2562_PI443154341	6666666.414137.peg.2517
CUST_5355_PI443154341	6666666.414137.peg.5267
CUST_1671_PI443154341	6666666.414137.peg.1641
CUST_5746_PI443154341	6666666.414137.peg.5658
CUST_2523_PI443154341	6666666.414137.peg.2479
CUST_3422_PI443154341	6666666.414137.peg.3356
CUST_4245_PI443154341	6666666.414137.peg.4165
CUST_3856_PI443154341	6666666.414137.peg.3782
CUST_5283_PI443154341	6666666.414137.peg.5195
CUST_1312_PI443154341	6666666.414137.peg.1292
CUST_5889_PI443154341	6666666.414137.peg.5799
CUST_4737_PI443154341	6666666.414137.peg.4654
CUST_928_PI443154341	6666666.414137.peg.913
CUST_938_PI443154341	6666666.414137.peg.923
CUST_606_PI443154341	6666666.414137.peg.596
CUST_1646_PI443154341	6666666.414137.peg.1616
CUST_367_PI443154341	6666666.414137.peg.360
CUST_1554_PI443154341	6666666.414137.peg.1526
CUST_1572_PI443154341	6666666.414137.peg.1544
CUST_5653_PI443154341	6666666.414137.peg.5565
CUST_2629_PI443154341	6666666.414137.peg.2585
CUST_5195_PI443154341	6666666.414137.peg.5107
CUST_108_PI443154341	6666666.414137.peg.105
CUST_2704_PI443154341	6666666.414137.peg.2657
CUST_5532_PI443154341	6666666.414137.peg.5444
CUST_2581_PI443154341	6666666.414137.peg.2536
CUST_2207_PI443154341	6666666.414137.peg.2173
CUST_4050_PI443154341	6666666.414137.peg.3974
CUST_5203_PI443154341	6666666.414137.peg.5115
CUST_3040_PI443154341	6666666.414137.peg.2984
CUST_5712_PI443154341	6666666.414137.peg.5624
CUST_3642_PI443154341	6666666.414137.peg.3570
CUST_4165_PI443154341	6666666.414137.peg.4085
CUST_2494_PI443154341	6666666.414137.peg.2451
CUST_4205_PI443154341	6666666.414137.peg.4125
CUST_5503_PI443154341	6666666.414137.peg.5415
CUST_1295_PI443154341	6666666.414137.peg.1275
CUST_5878_PI443154341	6666666.414137.rna.58
CUST_4811_PI443154341	6666666.414137.peg.4726
CUST_3345_PI443154341	6666666.414137.rna.44
CUST_3707_PI443154341	6666666.414137.peg.3634
CUST_5963_PI443154341	6666666.414137.peg.5872
CUST_172_PI443154341	6666666.414137.peg.168
CUST_4176_PI443154341	6666666.414137.peg.4096
CUST_562_PI443154341	6666666.414137.peg.552
CUST_617_PI443154341	6666666.414137.peg.607
CUST_1727_PI443154341	6666666.414137.peg.1697
CUST_3632_PI443154341	6666666.414137.peg.3560
CUST_2452_PI443154341	6666666.414137.peg.2410
CUST_763_PI443154341	6666666.414137.peg.750
CUST_431_PI443154341	6666666.414137.peg.423
CUST_3348_PI443154341	6666666.414137.peg.3284
CUST_1202_PI443154341	6666666.414137.peg.1183
CUST_2300_PI443154341	6666666.414137.peg.2265
CUST_3004_PI443154341	6666666.414137.rna.35
CUST_3692_PI443154341	6666666.414137.peg.3620
CUST_5596_PI443154341	6666666.414137.peg.5508
CUST_3647_PI443154341	6666666.414137.peg.3575
CUST_2143_PI443154341	6666666.414137.peg.2109
CUST_3607_PI443154341	6666666.414137.peg.3535
CUST_618_PI443154341	6666666.414137.peg.608
CUST_3562_PI443154341	6666666.414137.peg.3490
CUST_3387_PI443154341	6666666.414137.peg.3322
CUST_934_PI443154341	6666666.414137.peg.919
CUST_4771_PI443154341	6666666.414137.peg.4686
CUST_4249_PI443154341	6666666.414137.peg.4169
CUST_4509_PI443154341	6666666.414137.peg.4426
CUST_1977_PI443154341	6666666.414137.peg.1946
CUST_1675_PI443154341	6666666.414137.peg.1645
CUST_616_PI443154341	6666666.414137.peg.606
CUST_3849_PI443154341	6666666.414137.peg.3775
CUST_216_PI443154341	6666666.414137.peg.209
CUST_3014_PI443154341	6666666.414137.peg.2959
CUST_1373_PI443154341	6666666.414137.peg.1353
CUST_4823_PI443154341	6666666.414137.peg.4738
CUST_760_PI443154341	6666666.414137.peg.747
CUST_427_PI443154341	6666666.414137.peg.420
CUST_3815_PI443154341	6666666.414137.peg.3741
CUST_5805_PI443154341	6666666.414137.peg.5716
CUST_3843_PI443154341	6666666.414137.peg.3769
CUST_3674_PI443154341	6666666.414137.peg.3602
CUST_1614_PI443154341	6666666.414137.peg.1586
CUST_5153_PI443154341	6666666.414137.peg.5065
CUST_2248_PI443154341	6666666.414137.peg.2214
CUST_3980_PI443154341	6666666.414137.peg.3904
CUST_171_PI443154341	6666666.414137.peg.167
CUST_3809_PI443154341	6666666.414137.peg.3735
CUST_147_PI443154341	6666666.414137.peg.143
CUST_2410_PI443154341	6666666.414137.peg.2372
CUST_3372_PI443154341	6666666.414137.peg.3308
CUST_646_PI443154341	6666666.414137.peg.635
CUST_4946_PI443154341	6666666.414137.peg.4861
CUST_1534_PI443154341	6666666.414137.peg.1506
CUST_3915_PI443154341	6666666.414137.peg.3841
CUST_546_PI443154341	6666666.414137.peg.536
CUST_2310_PI443154341	6666666.414137.peg.2275
CUST_4099_PI443154341	6666666.414137.peg.4019
CUST_5990_PI443154341	6666666.414137.peg.5899
CUST_908_PI443154341	6666666.414137.peg.893
CUST_3500_PI443154341	6666666.414137.peg.3428
CUST_797_PI443154341	6666666.414137.peg.784
CUST_559_PI443154341	6666666.414137.peg.549
CUST_2157_PI443154341	6666666.414137.peg.2123
CUST_669_PI443154341	6666666.414137.peg.658
CUST_1335_PI443154341	6666666.414137.peg.1315
CUST_3969_PI443154341	6666666.414137.peg.3894
CUST_2725_PI443154341	6666666.414137.peg.2677
CUST_3424_PI443154341	6666666.414137.peg.3357
CUST_529_PI443154341	6666666.414137.peg.519
CUST_6024_PI443154341	6666666.414137.peg.5932
CUST_757_PI443154341	6666666.414137.peg.744
CUST_1561_PI443154341	6666666.414137.peg.1533
CUST_3189_PI443154341	6666666.414137.peg.3131
CUST_1842_PI443154341	6666666.414137.peg.1811
CUST_680_PI443154341	6666666.414137.peg.669
CUST_3376_PI443154341	6666666.414137.peg.3312
CUST_868_PI443154341	6666666.414137.peg.853
CUST_203_PI443154341	6666666.414137.peg.199
CUST_5909_PI443154341	6666666.414137.peg.5819
CUST_4686_PI443154341	6666666.414137.peg.4603
CUST_4680_PI443154341	6666666.414137.peg.4597
CUST_1885_PI443154341	6666666.414137.peg.1854
CUST_1515_PI443154341	6666666.414137.peg.1487
CUST_6015_PI443154341	6666666.414137.peg.5924
CUST_5877_PI443154341	6666666.414137.peg.5788
CUST_24_PI443154341	6666666.414137.peg.23
CUST_1068_PI443154341	6666666.414137.peg.1052
CUST_2726_PI443154341	6666666.414137.peg.2678
CUST_2880_PI443154341	6666666.414137.peg.2829
CUST_3078_PI443154341	6666666.414137.peg.3022
CUST_1474_PI443154341	6666666.414137.peg.1451
CUST_133_PI443154341	6666666.414137.peg.129
CUST_3940_PI443154341	6666666.414137.peg.3866
CUST_4154_PI443154341	6666666.414137.peg.4074
CUST_1340_PI443154341	6666666.414137.peg.1320
CUST_2998_PI443154341	6666666.414137.peg.2946
CUST_2426_PI443154341	6666666.414137.peg.2388
CUST_234_PI443154341	6666666.414137.peg.227
CUST_447_PI443154341	6666666.414137.peg.437
CUST_44_PI443154341	6666666.414137.peg.43
CUST_5766_PI443154341	6666666.414137.peg.5677
CUST_3304_PI443154341	6666666.414137.peg.3246
CUST_5328_PI443154341	6666666.414137.peg.5240
CUST_2598_PI443154341	6666666.414137.peg.2553
CUST_3386_PI443154341	6666666.414137.peg.3321
CUST_3462_PI443154341	6666666.414137.peg.3394
CUST_1266_PI443154341	6666666.414137.peg.1246
CUST_3009_PI443154341	6666666.414137.peg.2954
CUST_1004_PI443154341	6666666.414137.peg.988
CUST_687_PI443154341	6666666.414137.peg.676
CUST_2012_PI443154341	6666666.414137.peg.1979
CUST_1214_PI443154341	6666666.414137.peg.1195
CUST_1127_PI443154341	6666666.414137.peg.1110
CUST_94_PI443154341	6666666.414137.peg.92
CUST_2132_PI443154341	6666666.414137.peg.2098
CUST_1026_PI443154341	6666666.414137.peg.1010
CUST_340_PI443154341	6666666.414137.peg.333
CUST_1238_PI443154341	6666666.414137.peg.1219
CUST_2835_PI443154341	6666666.414137.peg.2784
CUST_3184_PI443154341	6666666.414137.peg.3126
CUST_3863_PI443154341	6666666.414137.peg.3789
CUST_2186_PI443154341	6666666.414137.peg.2152
CUST_4631_PI443154341	6666666.414137.peg.4548
CUST_3366_PI443154341	6666666.414137.peg.3302
CUST_1657_PI443154341	6666666.414137.peg.1627
CUST_5836_PI443154341	6666666.414137.peg.5747
CUST_1421_PI443154341	6666666.414137.peg.1400
CUST_1810_PI443154341	6666666.414137.peg.1779
CUST_481_PI443154341	6666666.414137.peg.471
CUST_5393_PI443154341	6666666.414137.peg.5305
CUST_5555_PI443154341	6666666.414137.peg.5467
CUST_1147_PI443154341	6666666.414137.peg.1128
CUST_595_PI443154341	6666666.414137.peg.585
CUST_5240_PI443154341	6666666.414137.peg.5152
CUST_3461_PI443154341	6666666.414137.peg.3393
CUST_3724_PI443154341	6666666.414137.peg.3651
CUST_363_PI443154341	6666666.414137.peg.356
CUST_5496_PI443154341	6666666.414137.peg.5408
CUST_1098_PI443154341	6666666.414137.peg.1081
CUST_5373_PI443154341	6666666.414137.peg.5285
CUST_2546_PI443154341	6666666.414137.peg.2502
CUST_4666_PI443154341	6666666.414137.peg.4583
CUST_2604_PI443154341	6666666.414137.peg.2559
CUST_3833_PI443154341	6666666.414137.peg.3759
CUST_4555_PI443154341	6666666.414137.peg.4472
CUST_3240_PI443154341	6666666.414137.peg.3182
CUST_5014_PI443154341	6666666.414137.peg.4929
CUST_1929_PI443154341	6666666.414137.peg.1898
CUST_1096_PI443154341	6666666.414137.peg.1079
CUST_4420_PI443154341	6666666.414137.peg.4340
CUST_1174_PI443154341	6666666.414137.peg.1155
CUST_4644_PI443154341	6666666.414137.peg.4561
CUST_5144_PI443154341	6666666.414137.peg.5057
CUST_5415_PI443154341	6666666.414137.peg.5327
CUST_1109_PI443154341	6666666.414137.peg.1092
CUST_5330_PI443154341	6666666.414137.peg.5242
CUST_5762_PI443154341	6666666.414137.peg.5673
CUST_2138_PI443154341	6666666.414137.peg.2104
CUST_5717_PI443154341	6666666.414137.peg.5629
CUST_4181_PI443154341	6666666.414137.peg.4101
CUST_3911_PI443154341	6666666.414137.peg.3837
CUST_871_PI443154341	6666666.414137.peg.856
CUST_2946_PI443154341	6666666.414137.peg.2894
CUST_5160_PI443154341	6666666.414137.peg.5072
CUST_1011_PI443154341	6666666.414137.peg.995
CUST_6023_PI443154341	6666666.414137.peg.5931
CUST_3360_PI443154341	6666666.414137.peg.3296
CUST_2979_PI443154341	6666666.414137.peg.2927
CUST_2301_PI443154341	6666666.414137.peg.2266
CUST_3266_PI443154341	6666666.414137.peg.3208
CUST_317_PI443154341	6666666.414137.peg.310
CUST_2926_PI443154341	6666666.414137.peg.2874
CUST_1_PI443154341	6666666.414137.repeat.1
CUST_1755_PI443154341	6666666.414137.peg.1725
CUST_4821_PI443154341	6666666.414137.peg.4736
CUST_4491_PI443154341	6666666.414137.peg.4409
CUST_774_PI443154341	6666666.414137.peg.761
CUST_5593_PI443154341	6666666.414137.peg.5505
CUST_3636_PI443154341	6666666.414137.peg.3564
CUST_5567_PI443154341	6666666.414137.peg.5479
CUST_3904_PI443154341	6666666.414137.peg.3830
CUST_4714_PI443154341	6666666.414137.peg.4631
CUST_3380_PI443154341	6666666.414137.peg.3316
CUST_1552_PI443154341	6666666.414137.peg.1524
CUST_3606_PI443154341	6666666.414137.peg.3534
CUST_4619_PI443154341	6666666.414137.peg.4536
CUST_4599_PI443154341	6666666.414137.peg.4516
CUST_1293_PI443154341	6666666.414137.peg.1273
CUST_5329_PI443154341	6666666.414137.peg.5241
CUST_4488_PI443154341	6666666.414137.peg.4406
CUST_4404_PI443154341	6666666.414137.peg.4324
CUST_4329_PI443154341	6666666.414137.peg.4249
CUST_4284_PI443154341	6666666.414137.peg.4204
CUST_581_PI443154341	6666666.414137.peg.571
[truncated: 4,026 more rows]
